# Supplementary material for: Controlling the stereochemistry in 2-oxo-aldehyde-derived Ugi adducts through the cinchona alkaloid-promoted electrophilic fluorination
Source: publisher site journal article supplement (doi:10.3762/bjoc.16.163), 2020-08-11

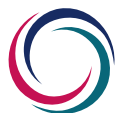

## Supporting Information

for

### **Controlling the stereochemistry in 2-oxo-aldehyde-derived Ugi adducts through the cinchona alkaloid-promoted electrophilic fluorination**

Yuqing Wang, Gaigai Wang, Anatoly A. Peshkov, Ruwei Yao, Muhammad Hasan, Manzoor Zaman, Chao Liu, Stepan Kashtanov, Olga P. Pereshivko and Vsevolod A. Peshkov

*Beilstein J. Org. Chem.* **2020**, *16*, 1963–1973. doi:10.3762/bjoc.16.163

### **Experimental procedures, characterization data and copies of spectra**

## Table of contents

|                                                                                                    |         |
|----------------------------------------------------------------------------------------------------|---------|
| X-ray crystallographic analysis                                                                    | S2      |
| Synthesis and characterization                                                                     | S10     |
| General information                                                                                | S10     |
| General procedure for the synthesis of Ugi adducts <b>8</b>                                        | S11     |
| General procedure for cinchona alkaloid-promoted electrophilic fluorination of Ugi adduct <b>8</b> | S15     |
| Copies of $^1\text{H}$ , $^{13}\text{C}$ and $^{19}\text{F}$ NMR spectra                           | S27–S69 |

## X-ray crystallographic analysis

### General details

Single crystals were obtained from the sample of product **12e** with the ee value of 74%. Slow evaporation from ethyl acetate/*n*-hexane 1:20 yielded two types of crystals. A part of the substance was crystallized in a racemic form (rac-**12e**) while the rest was crystallized in an enantiopure form ((*S*)-**12e**).

HPLC traces of the original sample

ee = 74 (slower enantiomer), chiral promotor is DHQ-Bn

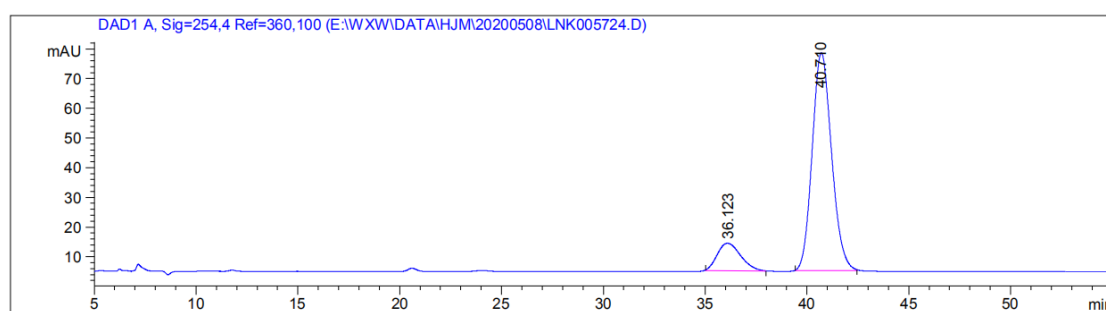

| Peak # | RetTime [min] | Type | Width [min] | Area [mAU*s] | Height [mAU] | Area %  |
|--------|---------------|------|-------------|--------------|--------------|---------|
| 1      | 36.123        | BB   | 0.9524      | 736.17999    | 9.19173      | 13.1752 |
| 2      | 40.710        | BB   | 1.0203      | 4851.42139   | 73.28774     | 86.8248 |

HPLC traces of (*S*)-**12e** (slower enantiomer)

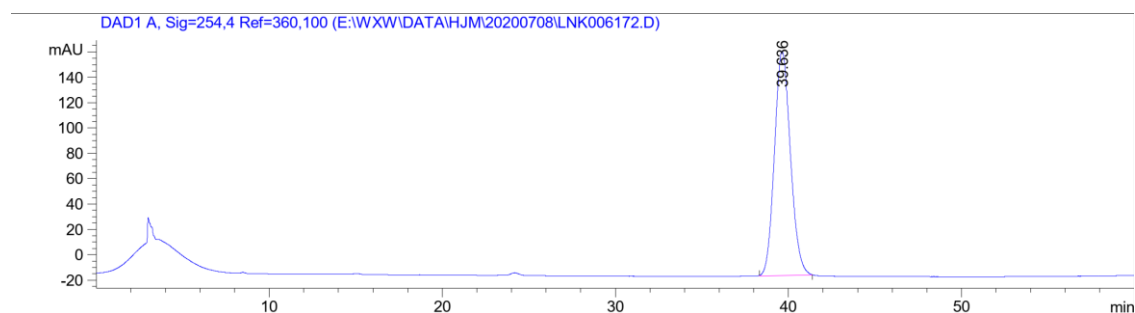

The images were interpreted and integrated with the program Diamond v.4.0 (Crystal Impact) [1]. Using

1. Diamond - Crystal and Molecular Structure Visualization Crystal Impact - Dr. H. Putz & Dr. K. Brandenburg GbR, Kreuzherrenstr. 102, 53227 Bonn, Germany <http://www.crystalimpact.com/diamond>.

Olex2 [2], the structures were solved with the ShelXS [3] structure solution program using direct methods, and refined by full-matrix least-squares on  $F^2$  with the ShelXL [4] refinement package.

#### Crystal data for rac-12e.

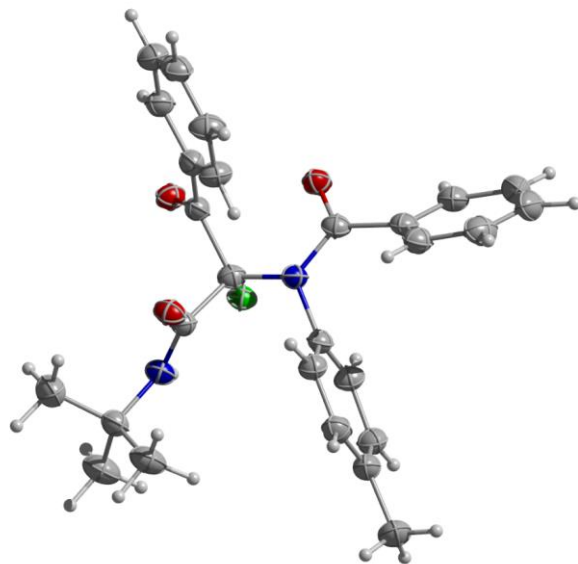

Molecular structure of rac-12e, showing thermal displacement ellipsoids at the 50% probability level

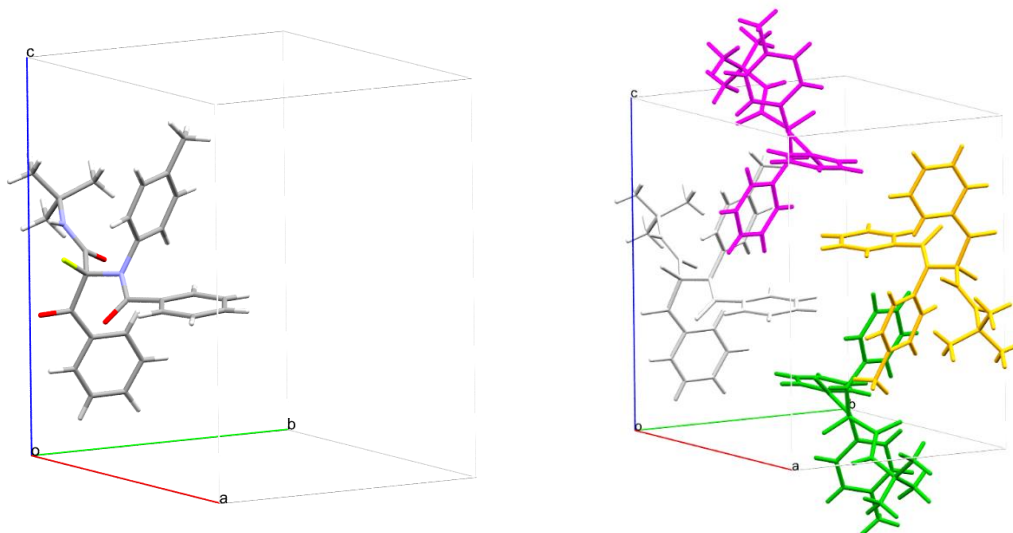

Composition of the unit cell of rac-12e. Asymmetric unit (left). Packing within the unit cell (right; colors: asymmetric unit (grey), molecules created by symmetry operations (green, yellow and magenta))

- 
2. Dolomanov, O. V.; Bourhis, L. J.; Gildea, R. J.; Howard, J. A. K.; Puschmann, H. *J. Appl. Cryst.* **2009**, *42*, 339–341.
  3. Sheldrick, G. M. *Acta Cryst. A* **2008**, *64*, 112–122.
  4. Sheldrick, G. M. *Acta Cryst. C* **2015**, *71*, 3–8.

**Crystal data for rac-12e.** C<sub>27</sub>H<sub>27</sub>FN<sub>2</sub>O<sub>3</sub> (*M* = 446.50 g/mol): monoclinic, space group P2<sub>1</sub>/n (no. 14), *a* = 13.199(2) Å, *b* = 11.712(2) Å, *c* = 15.424(3) Å, *V* = 2383.5(7) Å<sup>3</sup>, *Z* = 4, *T* = 120.0 K,  $\mu(\text{CuK}\alpha)$  = 0.705 mm<sup>-1</sup>, *D*<sub>calc</sub> = 1.244 g/cm<sup>3</sup>, 31661 reflections measured (9.482 ≤ 2 $\Theta$  ≤ 137.564), 4366 unique (*R*<sub>int</sub> = 0.1095, *R*<sub>sigma</sub> = 0.0530) which were used in all calculations. The final *R*<sub>i</sub> was 0.0637 (*I* > 2 $\sigma$ (*I*)) and *wR*<sub>2</sub> was 0.1783 (all data).

### Structural features:

- chirality: (*S*/*R*) both enantiomers are present in the unit cell

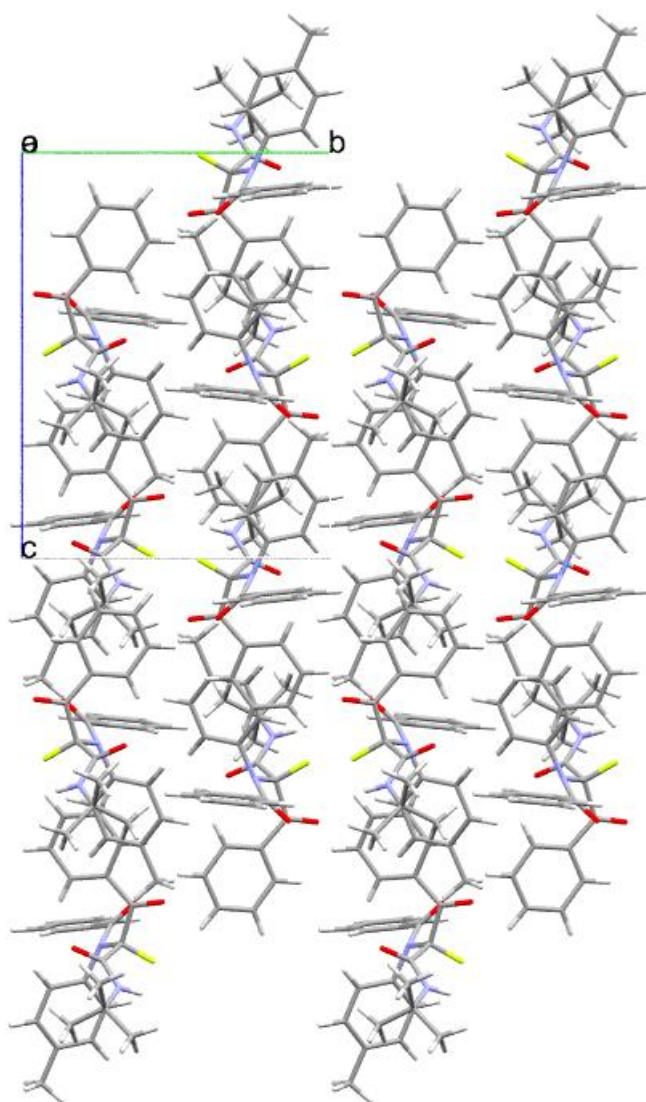

Packing diagram of the crystal structure of rac-12e, viewed down the crystallographic *a*-axis.

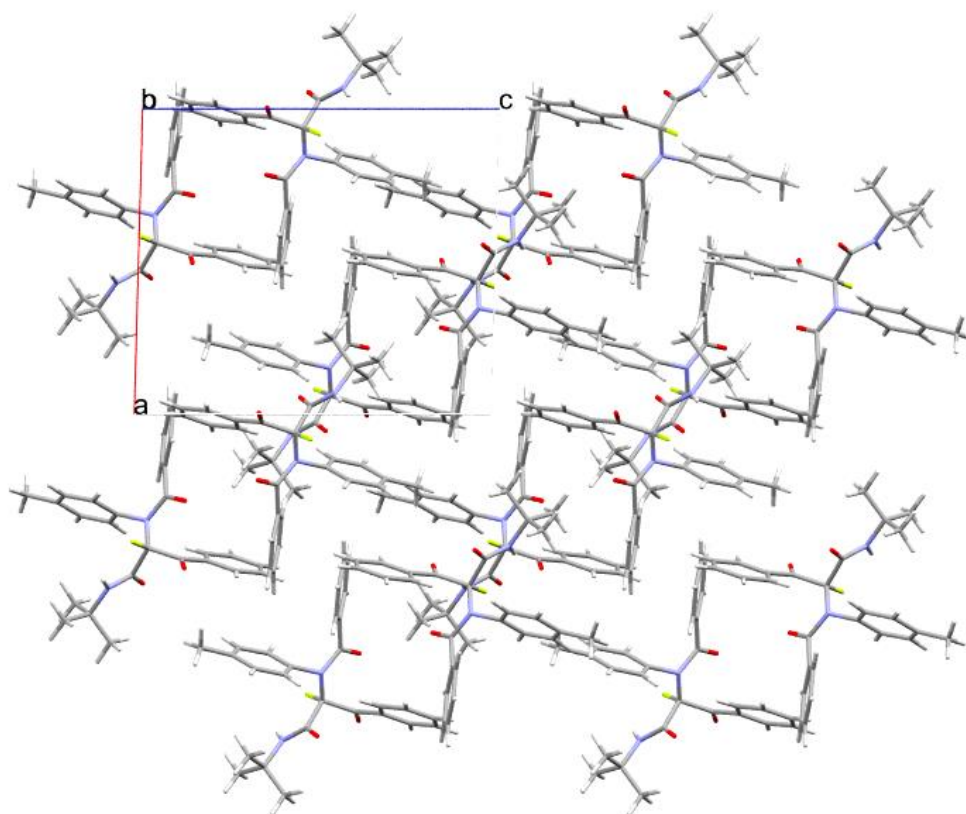

Packing diagram of the crystal structure of rac-**12e**, viewed down the crystallographic *b*-axis.

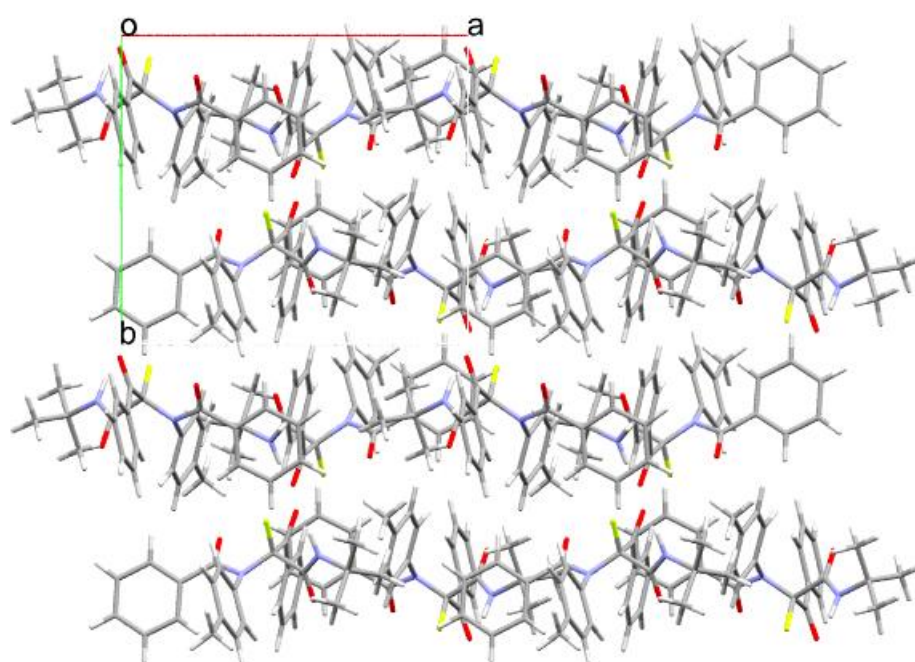

Packing diagram of the crystal structure of rac-**12e**, viewed down the crystallographic *c*-axis.

**Crystal data for (*S*)-12e.**

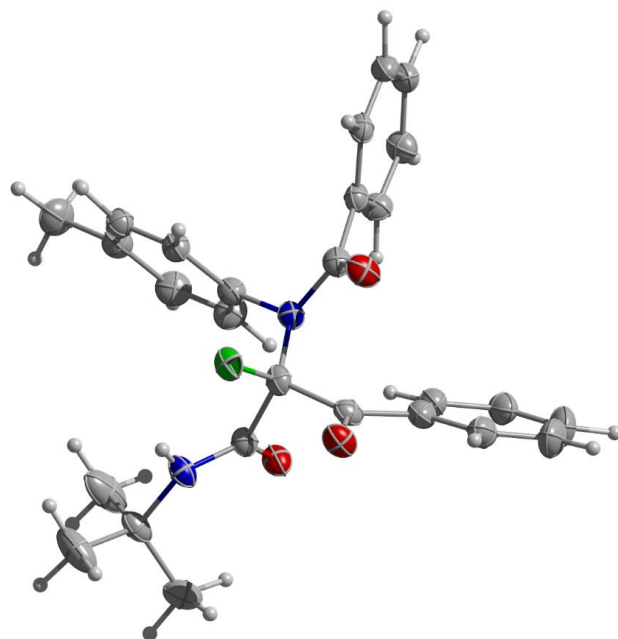

Molecular structure of (*S*)-12e, showing thermal displacement ellipsoids at the 50% probability level

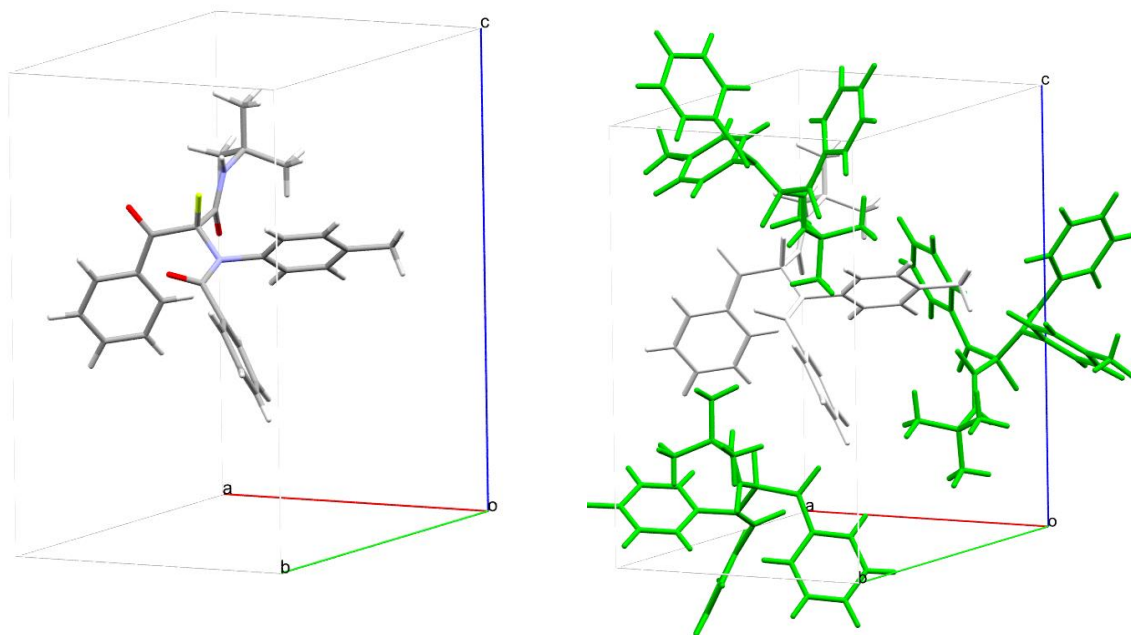

Composition of the unit cell of (*S*)-12e. Asymmetric unit (left). Packing within the unit cell (right; colors: asymmetric unit (grey), molecules created by symmetry operations (green))

**Crystal data for (*S*)-12e.**  $C_{27}H_{27}FN_2O_3$  ( $M = 44.65$  g/mol): orthorhombic, space group  $P2_12_12_1$  (no. 19),  $a = 10.0069(3)$  Å,  $b = 14.7854(5)$  Å,  $c = 16.3253(5)$  Å,  $V = 2415.43(13)$  Å<sup>3</sup>,  $Z = 40$ ,  $T = 120.0$  K,  $\mu(\text{CuK}\alpha) = 0.696$  mm<sup>-1</sup>,  $D_{\text{calc}} = 1.228$  g/cm<sup>3</sup>, 97609 reflections measured ( $8.068 \leq 2\theta \leq 136.662$ ), 4430 unique ( $R_{\text{int}} = 0.0666$ ,  $R_{\text{sigma}} = 0.0181$ ) which were used in all calculations. The final  $R_1$  was 0.0334 ( $I > 2\sigma(I)$ ) and  $wR_2$  was 0.0883 (all data).

### Structural features:

- chirality: C000 (*S*)

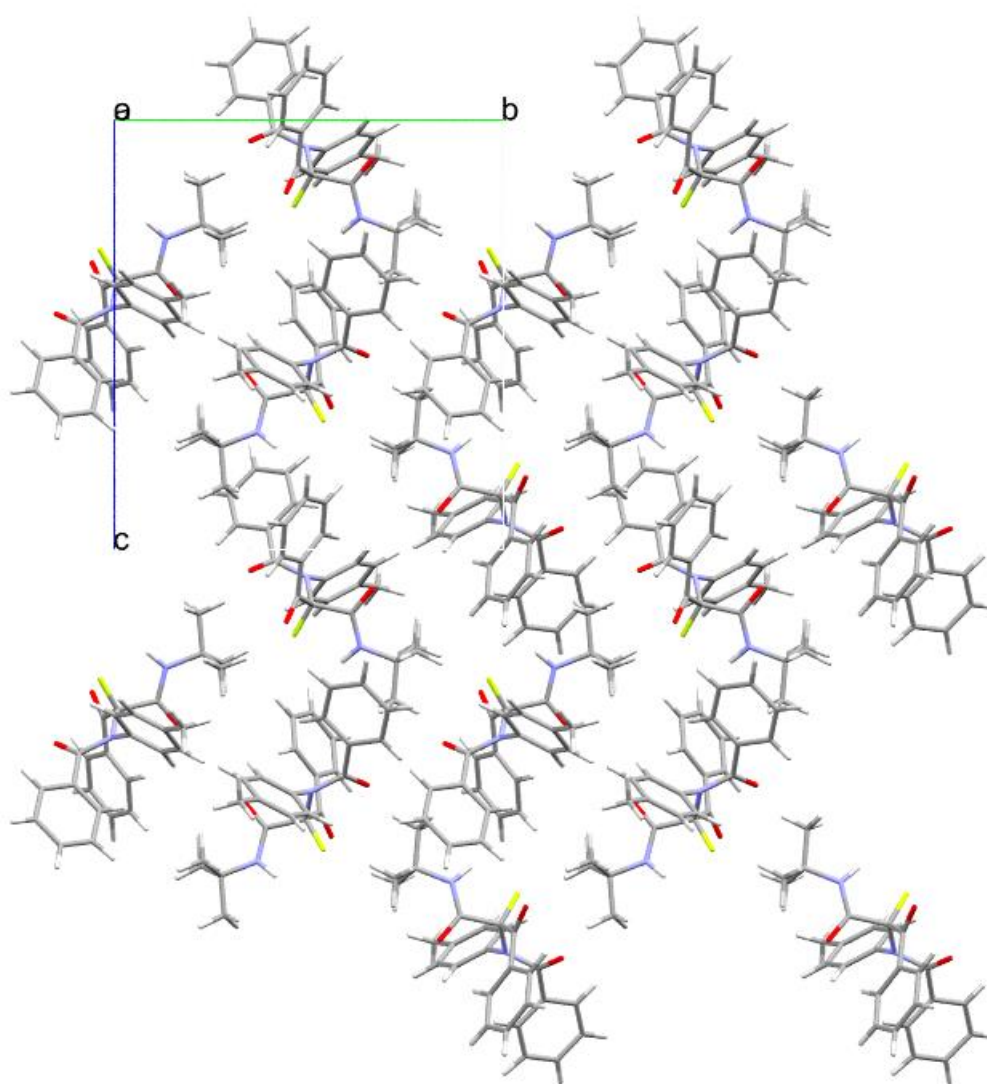

Packing diagram of the crystal structure of (*S*)-12e, viewed down the crystallographic *a*-axis.

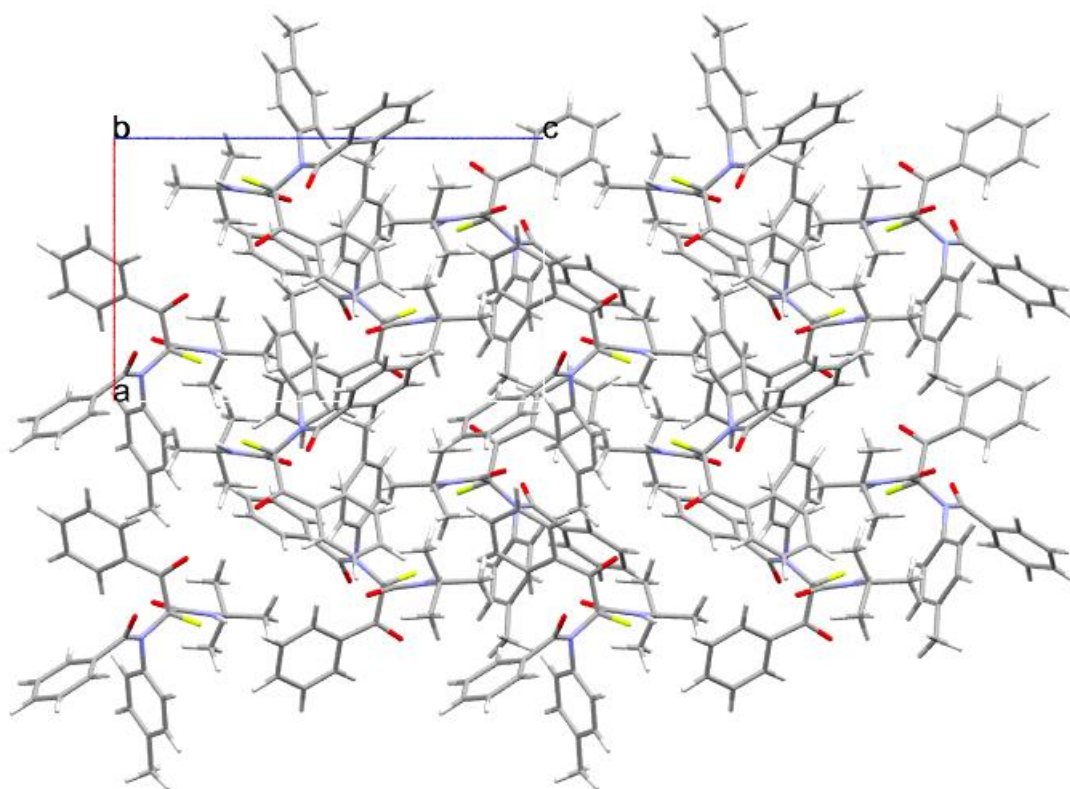

Packing diagram of the crystal structure of (*S*)-**12e**, viewed down the crystallographic *b*-axis.

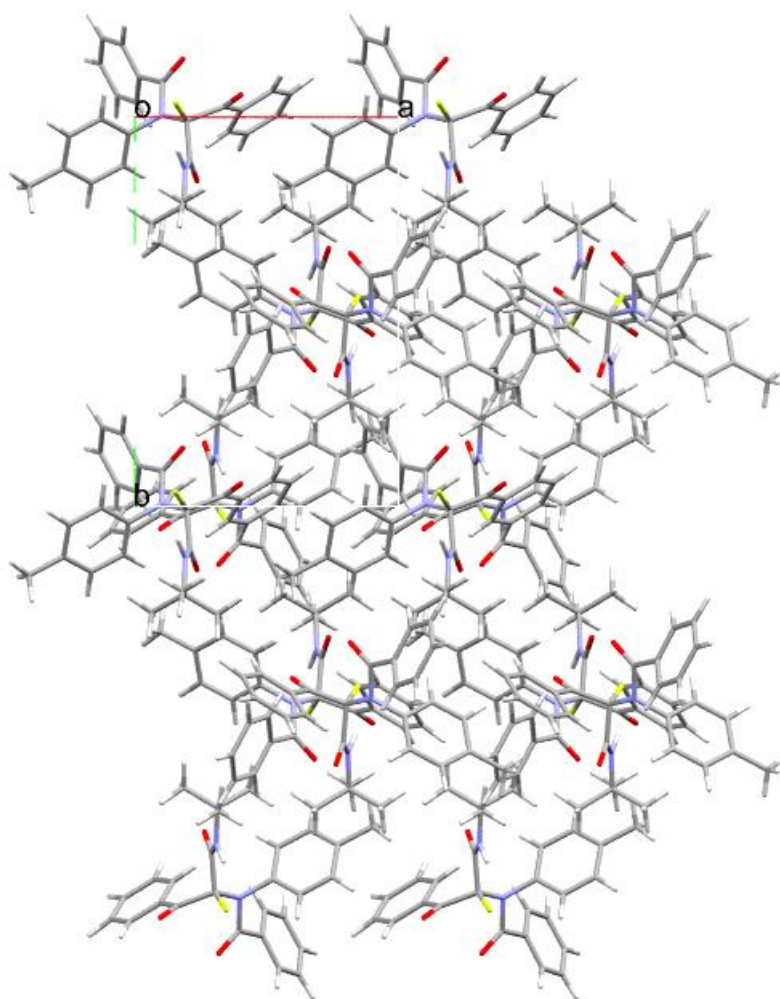

Packing diagram of the crystal structure of (*S*)-**12e**, viewed down the crystallographic *c*-axis.

## Synthesis and characterization

### General information

Unless otherwise specified, starting materials, reagents, and solvents were purchased from commercial sources and used as received. Q-Bn [5,6], Q-Ac [7], Q-Bz [7], DHQ-Bn [8], QD-Me [9], QD-Ac [7], QD-Bn [5,10,11] were synthesized following previously described protocols. Melting points were measured using INESA WRR apparatus. NMR spectra were recorded using 400 MHz Bruker Avance instruments. The  $^1\text{H}$  and  $^{13}\text{C}$  chemical shifts are reported relative to TMS using the residual  $\text{CDCl}_3$  or  $[\text{D}_6]\text{DMSO}$  signal as internal reference.  $^{19}\text{F}$  NMR spectra were referenced externally to  $\text{CF}_3\text{COOH}$  (−76.5 ppm) in a sealed capillary. HRMS were performed on a Bruker microTOF-Q III. High performance liquid chromatography (HPLC) was performed on an Agilent 1200 Series chromatograph using Daicel Chiralpak AD-H column (0.46 cm × 25 cm).

### Synthesis of dihydroquinidine benzyl ether (DHQD-Bn)

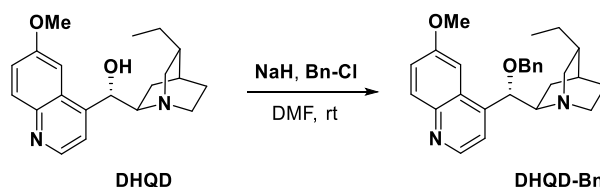

Adapted from the reported syntheses of similar cinchona alkaloid benzyl ethers [5,6,8,10,11], DHQD (2.0 g, 6.2 mmol) was dissolved in dry DMF (20 mL) followed by addition of NaH (0.68 g, 60% dispersion in mineral oil, 17 mmol). The resulting mixture was stirred at room temperature under inert atmosphere for 2 h. Then, benzyl chloride (0.75 mL, 0.83 g, 6.5 mmol) was added dropwise over the course of 10 minutes. The resulting mixture was stirred at room temperature under inert atmosphere for 17 h. Upon completion of this time, brine (50 mL) was added carefully and the resulting mixture was extracted with EtOAc (40 mL). The organic phase was washed with water (3 × 100 mL), dried over  $\text{Na}_2\text{SO}_4$ , and concentrated under reduced pressure. Column chromatography with ethyl acetate/methanol 99:1 provided DHQD-Bn as light yellow oil.  $[\alpha]_{\text{D}}^{25} = +117.6$  (c 0.86,  $\text{CHCl}_3$ );  $^1\text{H}$  NMR (400 MHz,  $\text{CDCl}_3$ )  $\delta$  8.75 (d,  $J = 4.5$  Hz, 1H), 8.05 (d,  $J = 9.2$  Hz, 1H), 7.48 (bd,  $J = 4.4$  Hz, 1H), 7.41 – 7.27 (m, 7H), 5.26 (bs, 1H), 4.48 (d,  $J = 11.4$  Hz, 1H), 4.38 (d,  $J = 11.4$  Hz, 1H), 3.90 (s, 3H), 3.10 – 2.93 (m, 2H), 2.92 – 2.64 (m, 3H), 2.08 – 1.97 (m, 1H), 1.70 – 1.63 (m, 1H), 1.52 – 1.33 (m, 5H), 1.28 – 1.15

5. He, P.; Liu, X.; Shi, J.; Lin, L.; Feng, X. *Org. Lett.* **2011**, *13*, 936–939.
6. Maddox, S. M.; Dawson, G. A.; Rochester, N. C.; Ayonon, A. B.; Moore, C. E.; Rheingold, A. L.; Gustafson, J. L. *ACS Catal.* **2018**, *8*, 5443–5447.
7. Hutzler, J. M.; Walker, G. S.; Wienkers, L. C. *Chem. Res. Toxicol.* **2003**, *16*, 450–459.
8. Kohler, M. C.; Yost, J. M.; Garnsey, M. R.; Coltart, D. M. *Org. Lett.* **2010**, *12*, 3376–3379.
9. Papageorgiou, C. D.; de Dios, M. A. C.; Ley, S. V.; Gaunt, M. J. *Angew. Chem. Int. Ed.* **2004**, *43*, 4641–4644.
10. Medina, S.; Harper, M.; Balmond, E.; Miranda, S.; Crisenza, G. E. M.; Coe, D.; McGarrigle, E.; Galan, M. C. *Org. Lett.* **2016**, *18*, 4222–4225.
11. Li, H. M.; Wang, Y.; Tang, L.; Deng, L. *J. Am. Chem. Soc.* **2004**, *126*, 9906–9907.

(m, 1H), 0.84 (t,  $J = 7.1$  Hz, 3H);  $^{13}\text{C}$  NMR (100 MHz,  $\text{CDCl}_3$ )  $\delta$  157.9, 147.6, 144.9, 144.7, 138.0, 131.8, 128.4, 128.0, 127.8, 127.6, 121.9, 119.0 (bs), 101.3, 80.8 (bs), 71.4, 60.1, 55.7, 51.1, 50.3, 37.5, 27.4, 26.5, 25.3, 21.8 (bs), 12.0; HRMS (ESI,  $[\text{M}+\text{H}]^+$ ) for  $\text{C}_{27}\text{H}_{33}\text{N}_2\text{O}_2^+$  calcd. 417.2537, found 417.2556.

### General procedure for the synthesis of Ugi adducts **8**

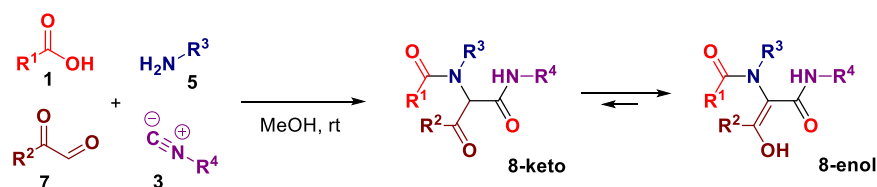

Analogous as described in [12,13], arylglyoxal monohydrate ( $7 \cdot \text{H}_2\text{O}$ , 1 mmol) was dissolved in methanol (5 mL), followed by addition of carboxylic acid (**1**, 1 mmol), amine (**5**, 1 mmol), and isocyanide (**3**, 1 mmol). The resulting mixture was stirred at room temperature for 24 hours. Upon completion of the reaction time, the mixture was diluted with ethyl acetate and concentrated with silica. Column chromatography with petroleum ether/ethyl acetate 19:1  $\rightarrow$  9:1 as eluent followed by triturating with hexane delivered pure Ugi adducts **8a–h**, while Ugi adduct **8i** was not triturated after the chromatography.

### *N*-Benzyl-*N*-(1-(*tert*-butylamino)-1,3-dioxo-3-phenylpropan-2-yl)benzamide (**8a**)

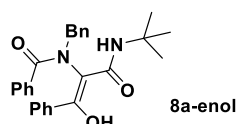

Yield: 62%; the analytical data was consistent with what is described in [12].

### *N*-Benzyl-*N*-(1-(*tert*-butylamino)-1,3-dioxo-3-phenylpropan-2-yl)-4-nitrobenzamide (**8b**)

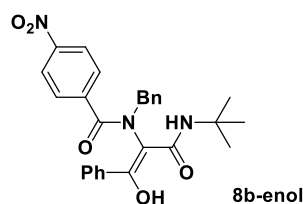

Yield: 79%; pale yellow solid; mp 156–158 °C; in  $\text{CDCl}_3$  observed as an enol form;  $^1\text{H}$  NMR (400 MHz,  $\text{CDCl}_3$ ):  $\delta$  15.34 (s, 1H), 8.03 (d,  $J = 8.9$  Hz, 2H), 7.53 – 7.43 (m, 7H), 7.43 – 7.37 (m, 3H), 7.21 (d,  $J =$

12. Wei, H.; Wang, G.; Wang, Y.; Li, B.; Huang, J.; Kashtanov, S.; Van Hecke, K.; Pereshivko, O. P.; Peshkov, V. A. *Chem. Asian J.* **2017**, *12*, 825–829.

13. Hasan, M.; Zaman, M.; Peshkov, A. A.; Amire, N.; Les, A.; Nechaev, A. A.; Wang, Y.; Kashtanov, S.; Van der Eycken, E. V.; Pereshivko, O. P.; Peshkov, V. A. *Eur. J. Org. Chem.* **2020**, 3378–3389.

8.9 Hz, 2H), 5.87 (d,  $J = 13.9$  Hz, 1H), 5.24 (bs, 1H), 3.82 (d,  $J = 13.9$  Hz, 1H), 0.95 (s, 9H);  $^{13}\text{C}$  NMR (100 MHz,  $\text{CDCl}_3$ )  $\delta$  170.61, 170.55, 169.3, 148.5, 142.0, 137.7, 133.5, 131.1, 129.7, 129.5, 128.90, 128.87, 127.8, 127.6, 123.0, 110.3, 55.9, 51.7, 28.1; HRMS (ESI,  $[\text{M}+\text{H}]^+$ ) for  $\text{C}_{27}\text{H}_{28}\text{N}_3\text{O}_5^+$  calcd. 474.2024, found 474.2033.

***N*-Benzyl-*N*-(1-(*tert*-butylamino)-3-(4-cyanophenyl)-1,3-dioxopropan-2-yl)benzamide (8c)**

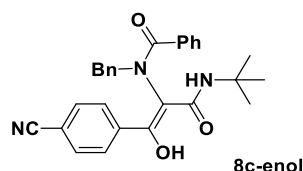

Yield: 72%; yellow solid; mp 163 – 165 °C; in  $\text{CDCl}_3$  observed as an enol form;  $^1\text{H}$  NMR (400 MHz,  $\text{CDCl}_3$ ):  $\delta$  15.36 (s, 1H), 7.66 (d,  $J = 8.4$  Hz, 2H), 7.53 (d,  $J = 8.4$  Hz, 2H), 7.50 – 7.43 (m, 2H), 7.41 – 7.31 (m, 4H), 7.25 – 7.15 (m, 4H), 5.78 (d,  $J = 13.8$  Hz, 1H), 5.32 (bs, 1H), 3.74 (d,  $J = 13.8$  Hz, 1H), 0.93 (s, 9H);  $^{13}\text{C}$  NMR (100 MHz,  $\text{CDCl}_3$ )  $\delta$  171.7, 170.3, 166.1, 138.1, 137.6, 135.1, 132.3, 130.8, 129.5, 129.4, 128.7, 128.2, 128.0, 127.2, 118.2, 114.0, 112.2, 55.5, 51.7, 27.9; HRMS (ESI,  $[\text{M}+\text{Na}]^+$ ) for  $\text{C}_{28}\text{H}_{27}\text{N}_3\text{O}_3\text{Na}^+$  calcd. 476.1945, found 476.1948.

***N*-(1-(*tert*-Butylamino)-1,3-dioxo-3-phenylpropan-2-yl)-*N*-phenylbenzamide (8d)**

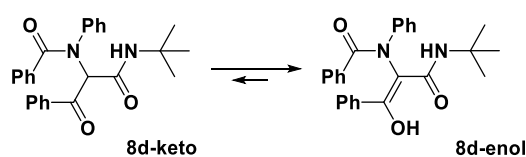

Yield: 67%; the analytical data was consistent with what is described in [13].

***N*-(1-(*tert*-Butylamino)-1,3-dioxo-3-phenylpropan-2-yl)-*N*-(*p*-tolyl)benzamide (8e)**

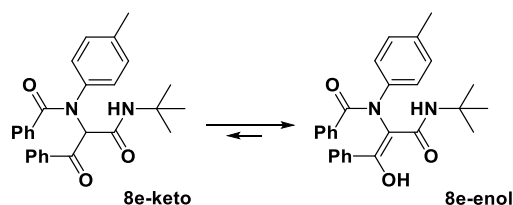

Yield: 56%; white solid; mp 154 – 156 °C; in  $\text{CDCl}_3$  observed as a 14:11 mixture of enol and keto forms;  $^1\text{H}$  NMR (400 MHz,  $\text{CDCl}_3$ )  $\delta$  14.98 (s, 0.56H, enol), 7.92 – 7.84 (m, 0.88H, keto), 7.58 – 7.50 (m, 0.44H, keto), 7.46 – 7.07 (m, 9.68H, enol + keto), 6.99 – 6.86 (m, 3.44H, enol + keto), 6.21 (s, 0.44H, keto), 5.81 (bs, 0.56H, enol), 2.34 (s, 1.68H, enol), 2.22 (s, 1.32H, keto), 1.29 (s, 5.04H, enol), 1.25 (s, 3.96H, keto);  $^{13}\text{C}$  NMR (100 MHz,  $\text{CDCl}_3$ )  $\delta$  195.8, 171.2, 171.1, 170.3, 170.2, 165.0, 139.3 (bs), 139.1, 137.4, 136.7, 136.2, 136.0, 135.0, 133.7, 133.2, 130.6, 130.4, 130.1, 129.9, 129.6, 128.7, 128.6, 128.39,

128.35, 128.1, 127.77, 127.75, 127.5, 127.2 (bs), 123.6, 109.0, 69.5, 52.0, 51.7, 28.8, 28.5, 21.1, 21.0; HRMS (ESI,  $[M+Na]^+$ ) for  $C_{27}H_{28}N_2O_3Na^+$  calcd. 451.1992, found 451.2007.

***N*-(1-(*tert*-Butylamino)-1,3-dioxo-3-phenylpropan-2-yl)-*N*-(4-fluorophenyl)benzamide (8f)**

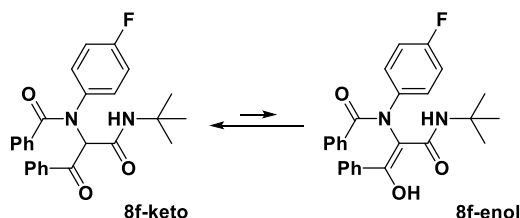

Yield: 48%; pale yellow solid, mp 128 – 130°C; in  $CDCl_3$  observed as a 2:3 mixture of enol and keto forms;  $^1H$  NMR (400 MHz,  $CDCl_3$ )  $\delta$  14.99 (s, 0.4H, enol), 7.92 – 7.84 (m, 1.2H, keto), 7.61 – 7.51 (m, 0.6H, keto), 7.49 – 7.19 (m, 6.2H, enol + keto), 7.18 – 7.01 (m, 4H, enol + keto), 6.99 – 6.93 (m, 0.8H, enol), 6.86 – 6.68 (m, 1.8H, keto), 6.40 – 6.31 (m, 0.6H, keto), 5.74 (bs, 0.4H, enol), 1.31 (s, 3.6H, enol), 1.24 (s, 5.4H, keto);  $^{13}C$  NMR (100 MHz,  $CDCl_3$ )  $\delta$  195.9, 171.2, 171.1, 170.6, 170.2, 164.7, 161.5 (d,  $J = 248.4$  Hz), 160.3 (d,  $J = 247.0$  Hz), 138.1 (m), 137.5 (d,  $J = 3.2$  Hz), 136.5, 135.8, 134.8, 133.6, 133.5, 130.74 (d,  $J = 7.0$  Hz), 130.71 (d,  $J = 8.6$  Hz), 130.1, 128.7, 128.6, 128.5, 128.2, 128.0, 127.9, 127.5, 127.3 (bs), 125.5, 125.4, 116.3 (d,  $J = 22.7$  Hz), 115.79 (d,  $J = 22.7$  Hz), 108.9, 68.7, 52.2, 52.0, 28.9, 28.5; HRMS (ESI,  $[M+Na]^+$ ) for  $C_{26}H_{25}FN_2O_3Na^+$  calcd. 455.1741, found 455.1762.

***N*-(1-(*tert*-Butylamino)-1,3-dioxo-3-phenylpropan-2-yl)-*N*-(4-chlorophenyl)benzamide (8g)**

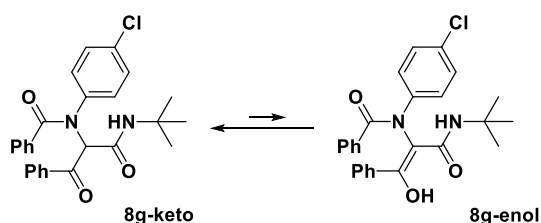

Yield: 39%; white solid; mp 131 – 133 °C; in  $CDCl_3$  observed as a 3:7 mixture of enol and keto forms;  $^1H$  NMR (400 MHz,  $CDCl_3$ )  $\delta$  15.01 (s, 0.3H, enol), 7.87 – 7.81 (m, 1.4H, keto), 7.60 – 7.53 (m, 0.7H, keto), 7.47 – 7.21 (m, 6.5H, enol + keto), 7.19 – 7.12 (m, 2H, enol + keto), 7.09 (d,  $J = 8.8$  Hz, 1.4H, keto), 6.99 (d,  $J = 8.8$  Hz, 1.4H, keto), 6.97 – 6.93 (m, 0.6H, enol), 6.79 (bs, 0.7H, keto), 6.29 (s, 0.7H, keto), 5.71 (bs, 0.3H, enol), 1.31 (s, 2.7H, enol), 1.27 (s, 6.3H, keto);  $^{13}C$  NMR (100 MHz,  $CDCl_3$ )  $\delta$  195.9, 171.2, 171.0, 170.8, 170.1, 164.6, 140.6, 140.2, 136.6, 135.7, 134.5, 133.5, 133.4, 133.2, 131.4, 130.83, 130.81, 130.3, 129.9, 129.6, 129.1, 128.7, 128.5, 128.1, 128.0, 127.9, 127.5, 127.3, 124.9, 108.6, 68.6, 52.2, 52.0, 28.9, 28.6; HRMS (ESI,  $[M+Na]^+$ ) for  $C_{26}H_{25}ClN_2O_3Na^+$  calcd. 471.1446, found 471.1515.

***N*-(1-(*tert*-Butylamino)-3-(4-methoxyphenyl)-1,3-dioxopropan-2-yl)-4-chloro-*N*-(4-methoxyphenyl)benzamide (8h)**

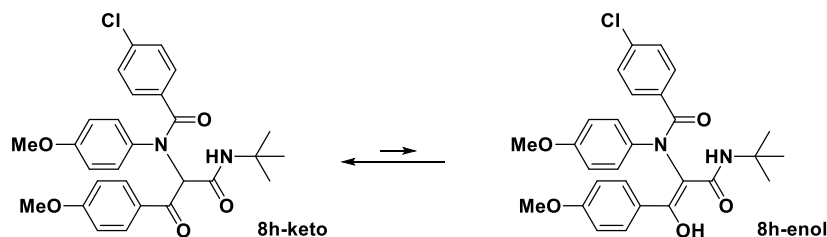

Yield: 68%; white solid; mp 87-89 °C; in CDCl<sub>3</sub> observed as a 17:83 mixture of enol and keto forms; <sup>1</sup>H NMR (400 MHz, CDCl<sub>3</sub>) δ 15.01 (s, 0.17H, enol), 7.94 (d, *J* = 8.9 Hz, 1.66H, keto), 7.36 (d, *J* = 8.8 Hz, 0.34H, enol), 7.22 (d, *J* = 8.6 Hz, 1.66H, keto), 7.14 – 7.07 (m, 2H, enol + keto), 7.04 – 6.83 (m, 4.34H, enol + keto), 6.79 (d, *J* = 9.0 Hz, 0.34H, enol), 6.73 (bs, 0.83H, keto), 6.62 (d, *J* = 9.0 Hz, 1.66H, keto), 6.51 (s, 0.83H, keto), 5.71 (bs, 0.17H, enol), 3.85 (s, 2.49H, keto), 3.82 (bs, 0.51H, enol), 3.79 (s, 0.51H, enol), 3.70 (s, 2.49H, keto), 1.27 (s, 1.53H, enol), 1.20 (s, 7.47H, keto); <sup>13</sup>C NMR (100 MHz, CDCl<sub>3</sub>) δ 194.0, 170.4, 170.3, 170.2, 170.1, 164.8, 164.1, 161.6, 158.8, 157.7, 136.4, 135.8, 133.8, 133.4, 130.8, 130.4, 130.1, 129.4, 129.0, 128.3 (bs), 128.1, 128.0, 124.8 (bs), 114.9, 114.1, 114.0, 113.9, 67.4, 55.7, 55.6, 55.4, 52.0, 51.8, 28.8, 28.5; HRMS (ESI, [M+H]<sup>+</sup>) for C<sub>28</sub>H<sub>30</sub>ClN<sub>2</sub>O<sub>5</sub><sup>+</sup> calcd. 509.1838, found 509.1821.

***N*-(1-(Butylamino)-1,3-dioxo-3-phenylpropan-2-yl)-*N*-phenylbenzamide (8i)**

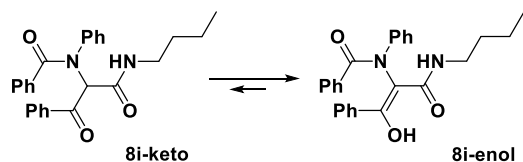

Yield: 70%; pale yellow oil; in CDCl<sub>3</sub> observed as a 2:1 mixture of enol and keto forms; <sup>1</sup>H NMR (400 MHz, CDCl<sub>3</sub>) δ 14.90 (s, 0.67H, enol), 7.86 – 7.80 (m, 0.66H, keto), 7.59 – 7.53 (m, 0.33H, keto), 7.51 – 7.02 (m, 13H, enol + keto), 6.97 – 6.91 (m, 1.34H, enol), 6.14 (s, 0.33H, keto), 5.87 (bt, *J* = 5.5 Hz, 0.67H, enol), 3.45 – 3.34 (m, 0.67H, enol), 3.33 – 3.17 (m, 1.33H, enol + keto), 1.47 – 1.22 (m, 2.66H, enol + keto), 1.13 – 1.02 (m, 1.34H, enol), 0.87 (t, *J* = 7.3 Hz, 0.99H, keto), 0.81 (t, *J* = 7.3 Hz, 2.01H, enol); <sup>13</sup>C NMR (100 MHz, CDCl<sub>3</sub>) δ 195.1, 171.4, 171.2, 170.3, 170.1, 166.1, 141.7, 141.5, 136.4, 135.8, 134.7, 133.3, 133.1, 130.6, 130.5, 130.0, 129.9, 129.4, 128.7, 128.5, 128.42, 128.36, 128.3, 127.9, 127.7, 127.4, 127.31, 127.26, 126.0, 123.7, 108.5, 68.8, 39.6, 39.0, 31.3, 31.1, 19.9, 19.5, 13.7, 13.6; HRMS (ESI, [M+H]<sup>+</sup>) for C<sub>26</sub>H<sub>27</sub>N<sub>2</sub>O<sub>3</sub><sup>+</sup> calcd. 415.2016, found 415.2021.

## General procedure for cinchona alkaloid-promoted electrophilic fluorination of Ugi adduct **8**

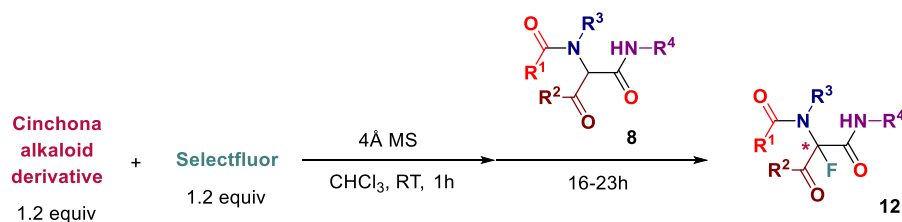

The cinchona alkaloid (0.18 mmol) was added to the reaction vial charged with 4 Å crushed molecular sieves (300 mg), followed by the addition of chloroform (2 mL), and Selectfluor (64 mg, 0.18 mmol). The resulting mixture was sealed and stirred at room temperature for 1 hour. Upon completion of this time the Ugi adduct **8** (0.15 mmol) dissolved in chloroform (2 mL) was added. The resulting mixture was stirred at room temperature for 21 hours (the reaction progress was monitored by TLC). After the starting compound **8** was consumed, the mixture was diluted with ethyl acetate and concentrated with a small amount of silica gel in order to perform a dry pack. Pure fluorinated products **12** were obtained by column chromatography using petroleum ether/ethyl acetate (the exact ratio was selected according to the TLC analysis) as eluent. Caution: Some of the products **12**, especially **12a–c** that were obtained from benzyl amine-derived Ugi adducts **8a–c**, were prone to a slow racemization over the prolonged storage at the room temperature. Therefore, all the samples of the isolated products **12** were stored in a fridge. In addition, we have tried to avoid any heating during the isolation of the most sensitive products **12a–c** (e.g., we did not use a water bath during the evaporation and utilized pre-cooled solvents for the column chromatography).

### *N*-Benzyl-*N*-(1-(*tert*-butylamino)-2-fluoro-1,3-dioxo-3-phenylpropan-2-yl)benzamide (**12a**)

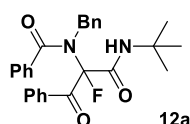

White solid; mp 120 – 122 °C;  $[\alpha]_{\text{D}}^{20} = +149.8$  (c 0.135, DCM, ee = 69 [faster enantiomer]);  $^1\text{H}$  NMR (400 MHz,  $\text{CDCl}_3$ )  $\delta$  8.32 – 8.21 (m, 2H), 7.54 – 7.47 (m, 1H), 7.47 – 7.40 (m, 2H), 7.40 – 7.32 (m, 3H), 7.32 – 7.19 (m, 5H), 7.16 – 7.08 (m, 2H), 6.42 (d,  $J = 5.5$  Hz, 1H), 4.99 (dd,  $J = 16.7, 1.9$  Hz, 1H), 4.93 (d,  $J = 16.4$  Hz, 1H), 1.22 (s, 9H);  $^{13}\text{C}$  NMR (100 MHz,  $\text{CDCl}_3$ )  $\delta$  189.3 (bd,  $J = 26.8$  Hz), 174.2 (d,  $J = 1.8$  Hz), 161.8 (d,  $J = 25.9$  Hz), 136.7 (d,  $J = 1.5$  Hz), 134.6, 134.2, 132.8, 131.0, 129.5 (d,  $J = 2.1$  Hz), 128.6, 128.5, 128.2, 127.74, 127.67 (d,  $J = 1.7$  Hz), 127.2, 102.5 (d,  $J = 234.7$  Hz), 52.4, 52.3 (d,  $J = 2.0$  Hz), 28.2;  $^{19}\text{F}$  NMR (377 MHz,  $\text{CDCl}_3$ )  $\delta$  -120.6 (bs); HRMS (ESI,  $[\text{M}+\text{H}]^+$ ) for  $\text{C}_{27}\text{H}_{28}\text{FN}_2\text{O}_3$  calcd. 447.2079, found 447.2078; HPLC analysis: chiral AD-H column, *i*PrOH/Hexanes = 10:90, flow rate: 1.0 mL/min, retention times are ~ 37 min (faster enantiomer) and ~ 41 min (slower enantiomer).

ee = 73 (faster enantiomer), chiral promotor is DHQ-Bn

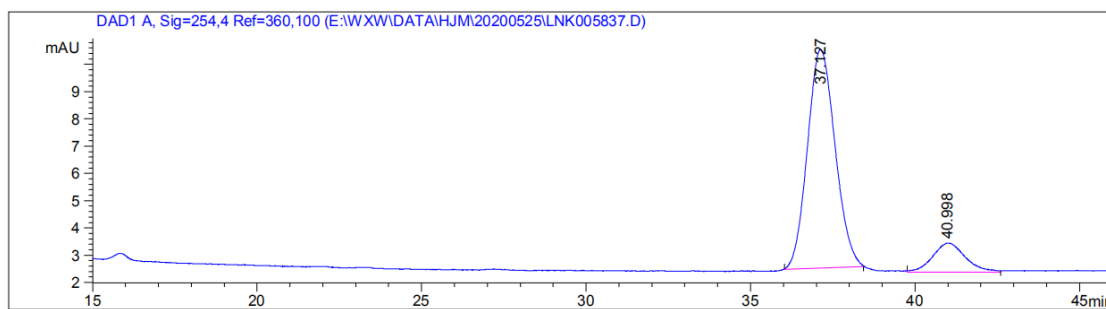

| Peak # | RetTime [min] | Type | Width [min] | Area [mAU*s] | Height [mAU] | Area %  |
|--------|---------------|------|-------------|--------------|--------------|---------|
| 1      | 37.127        | MM R | 0.9752      | 469.57669    | 8.02542      | 86.5261 |
| 2      | 40.998        | MM R | 1.1563      | 73.12293     | 1.05396      | 13.4739 |

ee = 62 (slower enantiomer), chiral promotor is QD

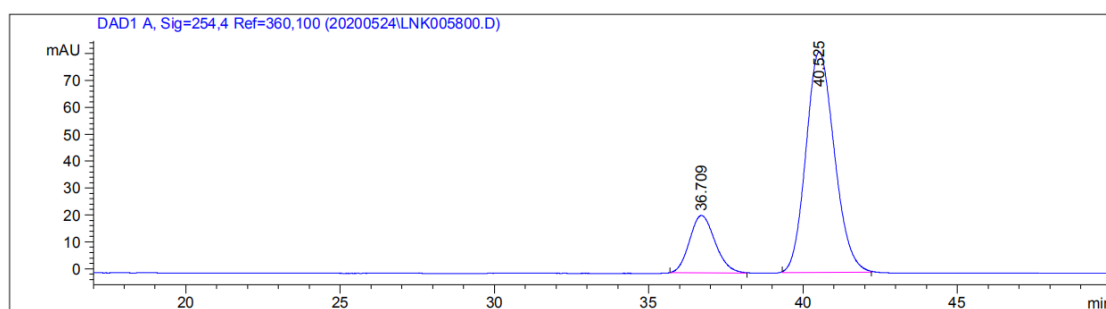

| Peak # | RetTime [min] | Type | Width [min] | Area [mAU*s] | Height [mAU] | Area %  |
|--------|---------------|------|-------------|--------------|--------------|---------|
| 1      | 36.709        | BB   | 0.8598      | 1230.31799   | 21.36578     | 18.9207 |
| 2      | 40.525        | BB   | 0.9973      | 5272.17285   | 82.08831     | 81.0793 |

***N*-Benzyl-*N*-(1-(*tert*-butylamino)-2-fluoro-1,3-dioxo-3-phenylpropan-2-yl)-4-nitrobenzamide (12b)**

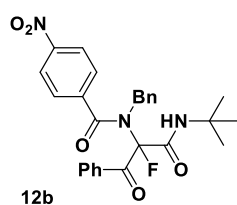

White solid; mp 142 – 144 °C; <sup>1</sup>H NMR (400 MHz, CDCl<sub>3</sub>) δ 8.26 – 8.19 (m, 2H), 8.12 (d, *J* = 8.8 Hz, 2H), 7.59 – 7.51 (m, 1H), 7.50 – 7.40 (m, 4H), 7.29 – 7.22 (m, 3H), 7.15 – 7.07 (m, 2H), 6.44 (d, *J* = 5.1 Hz, 1H), 4.93 (d, *J* = 16.9 Hz, 1H), 4.81 (dd, *J* = 16.8, 2.4 Hz, 1H), 1.22 (s, 9H); <sup>13</sup>C NMR (100

MHz, CDCl<sub>3</sub>)  $\delta$  189.1 (d,  $J = 27.2$  Hz), 172.2 (d,  $J = 2.0$  Hz), 161.4 (d,  $J = 25.4$  Hz), 148.9, 140.3, 136.2 (d,  $J = 1.5$  Hz), 134.5, 133.2, 129.5 (d,  $J = 2.7$  Hz), 128.9, 128.3, 128.1, 127.4 (d,  $J = 1.5$  Hz), 102.6 (d,  $J = 235.3$  Hz), 52.7, 52.4 (d,  $J = 1.6$  Hz), 28.2; <sup>19</sup>F NMR (377 MHz, CDCl<sub>3</sub>)  $\delta$  -121.0 (bs); HRMS (ESI, [M+H]<sup>+</sup>) for C<sub>27</sub>H<sub>27</sub>FN<sub>2</sub>O<sub>5</sub><sup>+</sup> calcd. 492.1929, found 492.1904; HPLC analysis: chiral AD-H column, *i*PrOH/Hexanes = 30:70, flow rate: 1.0 mL/min, retention times are ~ 26 min (faster enantiomer) and ~ 37 min (slower enantiomer).

ee = 51 (slower enantiomer), chiral promotor is DHQ-Bn

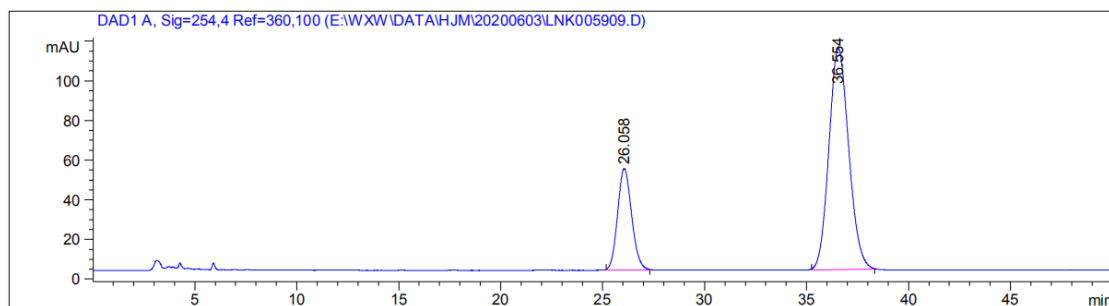

| Peak # | RetTime [min] | Type | Width [min] | Area [mAU*s] | Height [mAU] | Area %  |
|--------|---------------|------|-------------|--------------|--------------|---------|
| 1      | 26.058        | BB   | 0.7400      | 2443.36597   | 51.08418     | 24.4455 |
| 2      | 36.554        | BB   | 1.0505      | 7551.77588   | 111.44859    | 75.5545 |

ee = 24 (faster enantiomer), chiral promotor is QD-Bn

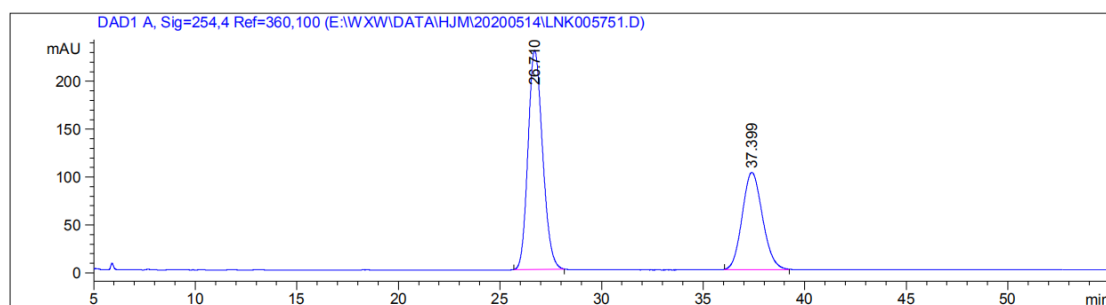

| Peak # | RetTime [min] | Type | Width [min] | Area [mAU*s] | Height [mAU] | Area %  |
|--------|---------------|------|-------------|--------------|--------------|---------|
| 1      | 26.710        | BB   | 0.7749      | 1.14443e4    | 229.03825    | 61.8749 |
| 2      | 37.399        | BB   | 1.0761      | 7051.55762   | 101.55120    | 38.1251 |

***N*-Benzyl-*N*-(1-(*tert*-butylamino)-3-(4-cyanophenyl)-2-fluoro-1,3-dioxopropan-2-yl)benzamide (12c)**

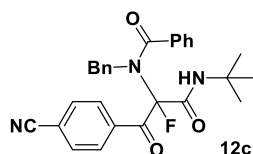

Pale yellow solid; mp 130 – 132 °C; <sup>1</sup>H NMR (400 MHz, CDCl<sub>3</sub>) δ 8.36 (bd, *J* = 7.8 Hz, 2H), 7.72 (d, *J* = 8.7 Hz, 2H), 7.45 – 7.38 (m, 1H), 7.36 – 7.28 (m, 4H), 7.28 – 7.21 (m, 3H), 7.15 – 7.07 (m, 2H), 6.38 (d, *J* = 5.8 Hz, 1H), 5.04 (dd, *J* = 16.6, 2.0 Hz, 1H), 4.91 (d, *J* = 16.6 Hz, 1H), 1.23 (s, 9H); <sup>13</sup>C NMR (100 MHz, CDCl<sub>3</sub>) δ 188.1 (bd, *J* = 28.0 Hz), 174.4 (d, *J* = 1.7 Hz), 161.4 (d, *J* = 25.7 Hz), 138.4, 136.3 (d, *J* = 1.5 Hz), 133.6, 131.9, 131.4, 129.8 (d, *J* = 1.9 Hz), 128.8, 128.7, 128.0, 127.7 (d, *J* = 1.5 Hz), 127.1, 118.2, 115.9, 102.1 (d, *J* = 235.6 Hz), 52.7, 52.4 (d, *J* = 1.2 Hz), 28.2; <sup>19</sup>F NMR (377 MHz, CDCl<sub>3</sub>) δ -120.9 (bs); HRMS (ESI, [M+H]<sup>+</sup>) for C<sub>28</sub>H<sub>27</sub>FN<sub>3</sub>O<sub>3</sub><sup>+</sup> calcd. 472.2031, found 472.2031; HPLC analysis: chiral AD-H column, *i*PrOH/Hexanes = 20:80, flow rate: 1.0 mL/min, retention times are ~ 30 min (faster enantiomer) and ~ 39 min (slower enantiomer).

ee = 43 (slower enantiomer), chiral promotor is DHQ

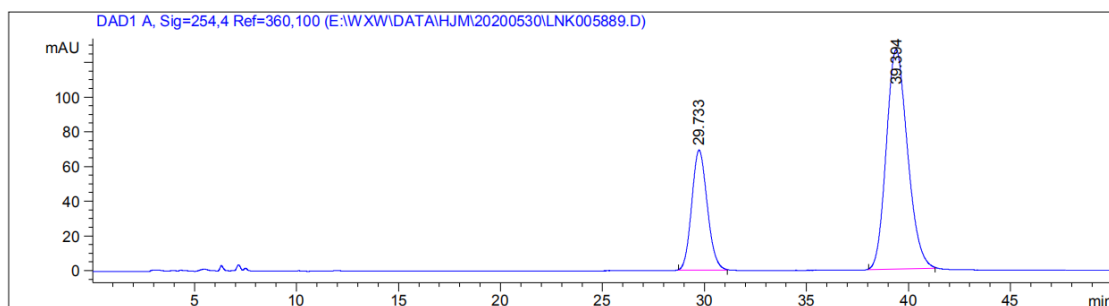

| Peak # | RetTime [min] | Type | Width [min] | Area [mAU*s] | Height [mAU] | Area %  |
|--------|---------------|------|-------------|--------------|--------------|---------|
| 1      | 29.733        | BB   | 0.8153      | 3660.97266   | 69.18863     | 28.5165 |
| 2      | 39.394        | BB   | 1.1234      | 9177.09082   | 126.64333    | 71.4835 |

ee = 30 (faster enantiomer), chiral promotor is QD

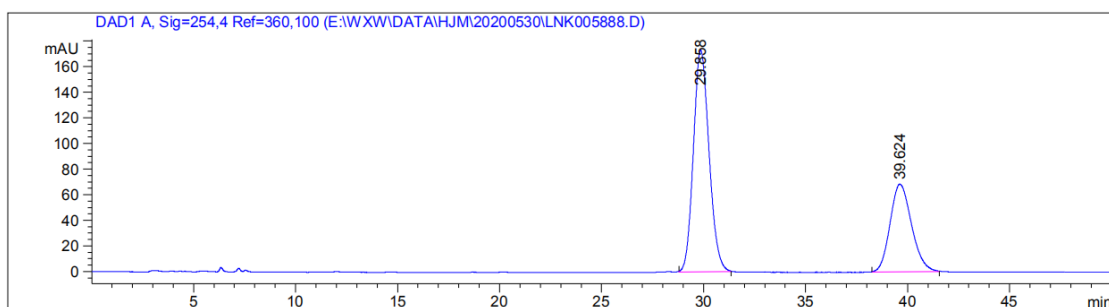

| Peak # | RetTime [min] | Type | Width [min] | Area [mAU*s] | Height [mAU] | Area %  |
|--------|---------------|------|-------------|--------------|--------------|---------|
| 1      | 29.858        | BB   | 0.8262      | 9222.59473   | 172.94363    | 64.8830 |
| 2      | 39.624        | BB   | 1.1275      | 4991.60156   | 68.39449     | 35.1170 |

***N*-(1-(*tert*-Butylamino)-2-fluoro-1,3-dioxo-3-phenylpropan-2-yl)-*N*-phenylbenzamide (12d)**

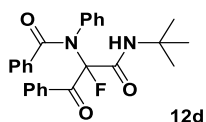

White solid; mp 133 – 135 °C;  $[\alpha]_D^{20} = +180.3$  (c 0.217, DCM, ee = 71 [slower enantiomer]);  $^1\text{H}$  NMR (400 MHz,  $[\text{D}_6]\text{DMSO}$ )  $\delta$  8.25 (bs, 2H), 7.74 (bs, 1H), 7.65 – 7.52 (m, 3H), 7.49 – 7.38 (m, 2H), 7.34 – 7.16 (m, 8H), 0.97 (s, 9H);  $^{13}\text{C}$  NMR (100 MHz,  $\text{CDCl}_3$ )  $\delta$  189.5 (bd,  $J = 28.2$  Hz), 172.5, 161.0 (d,  $J = 25.8$  Hz), 138.8 (d,  $J = 2.2$  Hz), 135.2, 133.8, 132.7, 130.79 (bs), 130.75, 129.7 (d,  $J = 3.1$  Hz), 129.2, 128.9, 128.6, 128.1, 127.9, 102.3 (d,  $J = 236.1$  Hz), 52.0, 28.0;  $^{19}\text{F}$  NMR (377 MHz,  $\text{CDCl}_3$ )  $\delta$  -123.9 (bs); HRMS (ESI,  $[\text{M}+\text{H}]^+$ ) for  $\text{C}_{26}\text{H}_{26}\text{FN}_2\text{O}_3^+$  calcd. 433.1922, found 433.1922; HPLC analysis: chiral AD-H column, *i*PrOH/Hexanes = 30:70, flow rate: 1.0 mL/min, retention times are ~ 9 min (faster enantiomer) and ~ 12 min (slower enantiomer).

ee = 59 (faster enantiomer), chiral promotor is QD-Bn

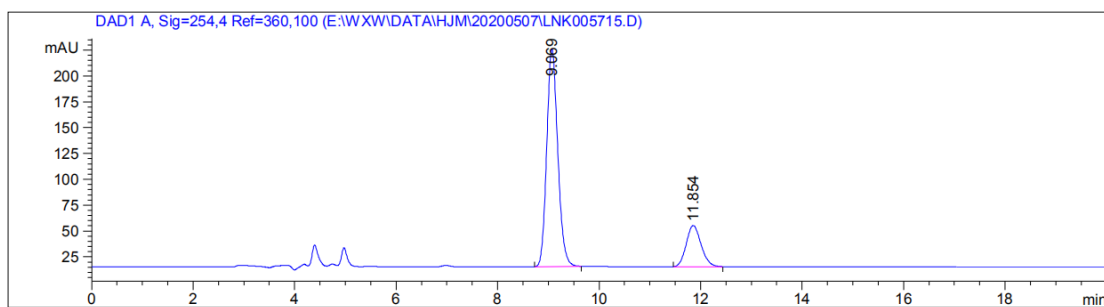

| Peak # | RetTime [min] | Type | Width [min] | Area [mAU*s] | Height [mAU] | Area %  |
|--------|---------------|------|-------------|--------------|--------------|---------|
| 1      | 9.069         | BB   | 0.2325      | 3182.16138   | 210.38148    | 79.5376 |
| 2      | 11.854        | BB   | 0.3171      | 818.66614    | 39.94847     | 20.4624 |

ee = 71 (slower enantiomer), chiral promotor is DHQ-Bn

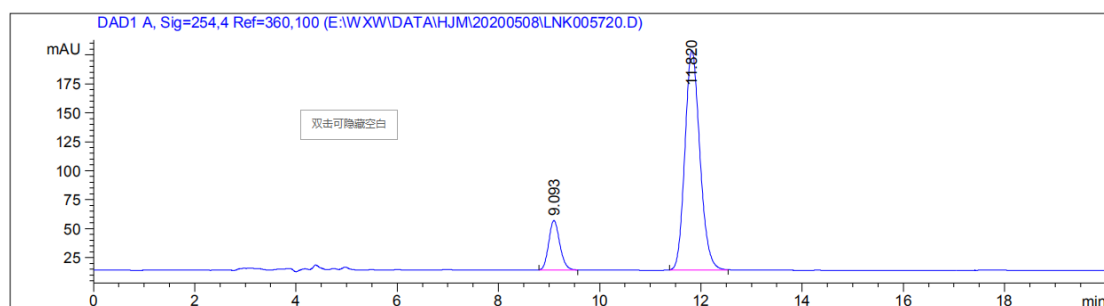

| Peak # | RetTime [min] | Type | Width [min] | Area [mAU*s] | Height [mAU] | Area %  |
|--------|---------------|------|-------------|--------------|--------------|---------|
| 1      | 9.093         | BB   | 0.2367      | 656.60040    | 42.85953     | 14.3962 |
| 2      | 11.820        | BB   | 0.3186      | 3904.31860   | 189.33868    | 85.6038 |

***N*-(1-(*tert*-Butylamino)-2-fluoro-1,3-dioxo-3-phenylpropan-2-yl)-*N*-(*p*-tolyl)benzamide (12e)**

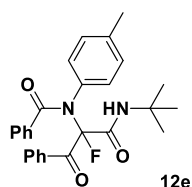

White solid; mp 128 – 130 °C;  $[\alpha]_D^{20} = +192.5$  (c 0.581, DCM, ee = 74 [slower enantiomer]);  $^1\text{H}$  NMR (400 MHz,  $[\text{D}_6]\text{DMSO}$ )  $\delta$  8.24 (bs, 2H), 7.68 (bd,  $J = 2.8$  Hz, 1H), 7.64 – 7.58 (m, 1H), 7.58 – 7.51 (m, 2H), 7.36 – 7.17 (m, 7H), 7.11 (d,  $J = 8.3$  Hz, 2H), 2.22 (s, 3H), 0.98 (s, 9H);  $^{13}\text{C}$  NMR (100 MHz,  $\text{CDCl}_3$ )  $\delta$  189.4 (bd,  $J = 25.6$  Hz), 172.6, 161.0 (d,  $J = 25.9$  Hz), 138.9, 136.0 (d,  $J = 2.2$  Hz), 135.2, 133.8, 132.6, 130.7, 130.5 (bs), 129.7, 129.6 (d,  $J = 2.9$  Hz), 128.5, 128.1, 127.8, 102.3 (d,  $J = 236.0$  Hz), 51.9, 28.0, 21.1;  $^{19}\text{F}$  NMR (377 MHz,  $\text{CDCl}_3$ )  $\delta$  -123.8 (bs); HRMS (ESI,  $[\text{M}+\text{H}]^+$ ) for  $\text{C}_{27}\text{H}_{28}\text{FN}_2\text{O}_3^+$  calcd. 447.2079, found 447.2081; HPLC analysis: chiral AD-H column, *i*PrOH/Hexanes = 10:90, flow rate: 1.0 mL/min, retention times are ~ 36 min (faster enantiomer) and ~ 41 min (slower enantiomer).

ee = 61 (faster enantiomer), chiral promotor is QD-Bn

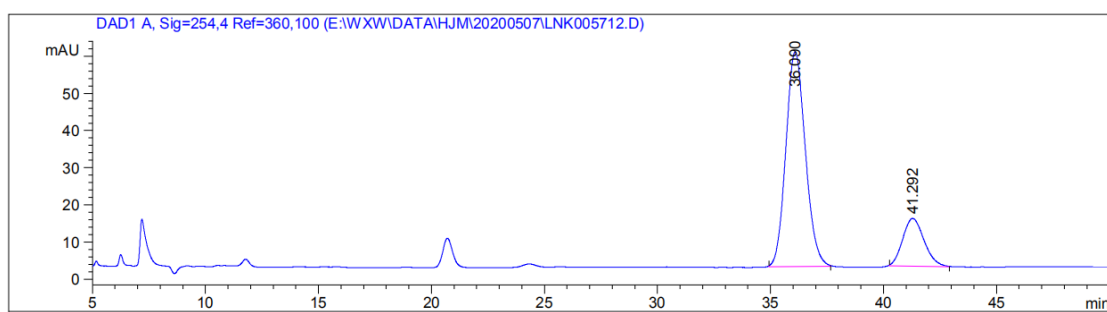

| Peak # | RetTime [min] | Type | Width [min] | Area [mAU*s] | Height [mAU] | Area %  |
|--------|---------------|------|-------------|--------------|--------------|---------|
| 1      | 36.090        | BB   | 0.9327      | 3457.74121   | 57.73540     | 80.4733 |
| 2      | 41.292        | BB   | 0.9369      | 839.01526    | 12.79787     | 19.5267 |

ee = 74 (slower enantiomer), chiral promotor is DHQ-Bn

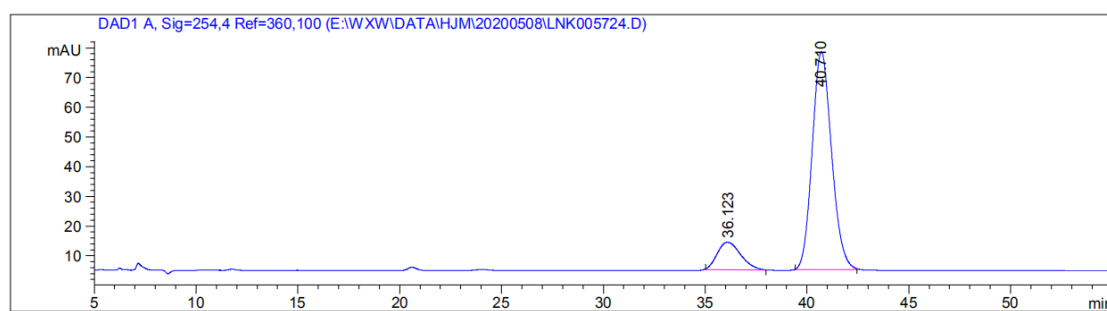

| Peak # | RetTime [min] | Type | Width [min] | Area [mAU*s] | Height [mAU] | Area %  |
|--------|---------------|------|-------------|--------------|--------------|---------|
| 1      | 36.123        | BB   | 0.9524      | 736.17999    | 9.19173      | 13.1752 |
| 2      | 40.710        | BB   | 1.0203      | 4851.42139   | 73.28774     | 86.8248 |

***N*-(1-(*tert*-Butylamino)-2-fluoro-1,3-dioxo-3-phenylpropan-2-yl)-*N*-(4-fluorophenyl)benzamide (12f)**

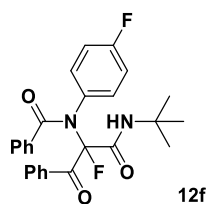

White solid; mp 125 – 127 °C;  $[\alpha]_D^{20} = +177.0$  (c 0.547, DCM, ee = 66 [slower enantiomer]);  $^1\text{H}$  NMR (400 MHz,  $[\text{D}_6]\text{DMSO}$ )  $\delta$  8.22 (bs, 2H), 7.85 (bs, 1H), 7.66 – 7.59 (m, 1H), 7.59 – 7.44 (m, 4H), 7.33 – 7.27 (m, 1H), 7.27 – 7.20 (m, 4H), 7.19 – 7.12 (m, 2H), 1.00 (s, 9H);  $^{13}\text{C}$  NMR (100 MHz,  $\text{CDCl}_3$ )  $\delta$  189.1 (bd,  $J = 26.7$  Hz), 172.5, 162.4 (d,  $J = 250.3$  Hz), 160.9 (d,  $J = 25.7$  Hz), 135.1, 134.7 (dd,  $J = 3.1, 2.5$  Hz), 133.6, 132.8, 132.7 (bd,  $J = 8.8$  Hz), 130.9, 129.6 (d,  $J = 2.9$  Hz), 128.5, 128.2, 128.1, 116.0 (d,  $J = 22.8$  Hz), 102.3 (d,  $J = 236.3$  Hz), 52.1, 28.1;  $^{19}\text{F}$  NMR (377 MHz,  $\text{CDCl}_3$ )  $\delta$  (-111.6) – (-111.8) (m), -124.0 (bs); HRMS (ESI,  $[\text{M}+\text{H}]^+$ ) for  $\text{C}_{26}\text{H}_{25}\text{F}_2\text{N}_2\text{O}_3^+$  calcd. 451.1828, found 451.1854; HPLC analysis: chiral AD-H column, *i*PrOH/Hexanes = 20:80, flow rate: 1.0 mL/min, retention times are ~ 14 min (faster enantiomer) and ~ 27 min (slower enantiomer).

ee = 58 (faster enantiomer), chiral promotor is QD-Bn

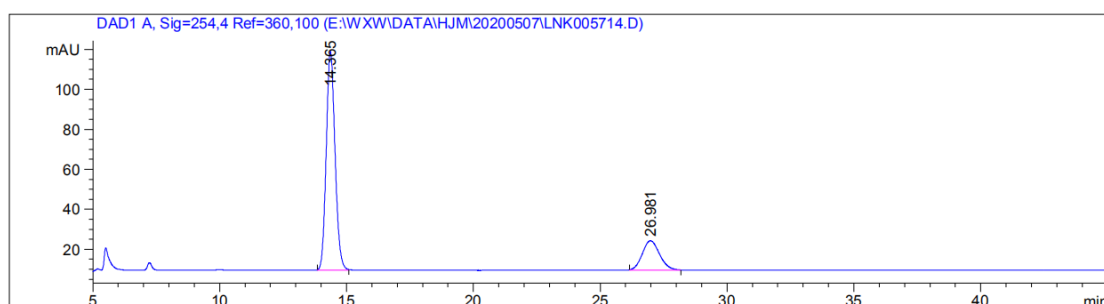

| Peak # | RetTime [min] | Type | Width [min] | Area [mAU*s] | Height [mAU] | Area %  |
|--------|---------------|------|-------------|--------------|--------------|---------|
| 1      | 14.365        | BB   | 0.3736      | 2639.30957   | 109.35254    | 79.2013 |
| 2      | 26.981        | BB   | 0.7227      | 693.09692    | 14.68353     | 20.7987 |

ee = 72 (slower enantiomer), chiral promotor is DHQ-Bn

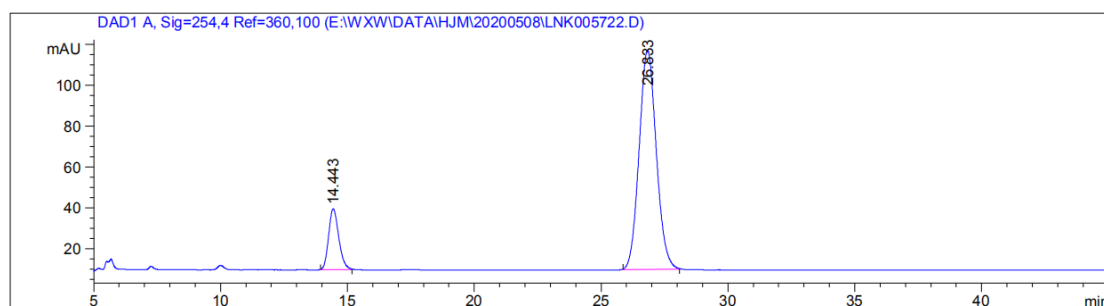

| Peak # | RetTime [min] | Type | Width [min] | Area [mAU*s] | Height [mAU] | Area %  |
|--------|---------------|------|-------------|--------------|--------------|---------|
| 1      | 14.443        | BB   | 0.4265      | 829.92725    | 29.83978     | 14.1275 |
| 2      | 26.833        | BB   | 0.7295      | 5044.61621   | 107.10073    | 85.8725 |

***N*-(1-(*tert*-Butylamino)-2-fluoro-1,3-dioxo-3-phenylpropan-2-yl)-*N*-(4-chlorophenyl)benzamide (12g)**

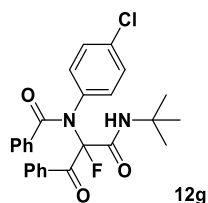

White solid; mp 153 – 155 °C;  $[\alpha]_D^{20} = +186.9$  (c 0.546, DCM, ee = 70 [slower enantiomer]);  $^1\text{H}$  NMR (400 MHz,  $[\text{D}_6]\text{DMSO}$ )  $\delta$  8.21 (bs, 2H), 7.88 (bs, 1H), 7.66 – 7.59 (m, 1H), 7.59 – 7.52 (m, 2H), 7.52 – 7.42 (m, 2H), 7.39 (d,  $J = 8.9$  Hz, 2H), 7.34 – 7.28 (m, 1H), 7.28 – 7.20 (m, 4H), 1.01 (s, 9H);  $^{13}\text{C}$  NMR (100 MHz,  $\text{CDCl}_3$ )  $\delta$  189.1 (bd,  $J = 27.2$  Hz), 172.3, 160.9 (d,  $J = 25.7$  Hz), 137.3 (d,  $J = 2.2$  Hz), 135.0 (bs), 134.9, 133.5, 132.9, 132.1 (bs), 131.1, 129.6 (d,  $J = 3.0$  Hz), 129.3, 128.5, 128.2, 128.1, 102.2 (d,  $J = 236.5$  Hz), 52.2, 28.1;  $^{19}\text{F}$  NMR (377 MHz,  $\text{CDCl}_3$ )  $\delta$  -124.1 (bs); HRMS (EI,  $[\text{M}+\text{Na}]^+$ ) for  $\text{C}_{26}\text{H}_{24}\text{ClFN}_2\text{O}_3\text{Na}^+$  calcd. 489.1351, found 489.1378; HPLC analysis: chiral AD-H column, *i*PrOH/Hexanes = 30:70, flow rate: 1.0 mL/min, retention times are ~ 12 min (faster enantiomer) and ~ 18 min (slower enantiomer).

ee = 60 (faster enantiomer), chiral promotor is QD-Bn

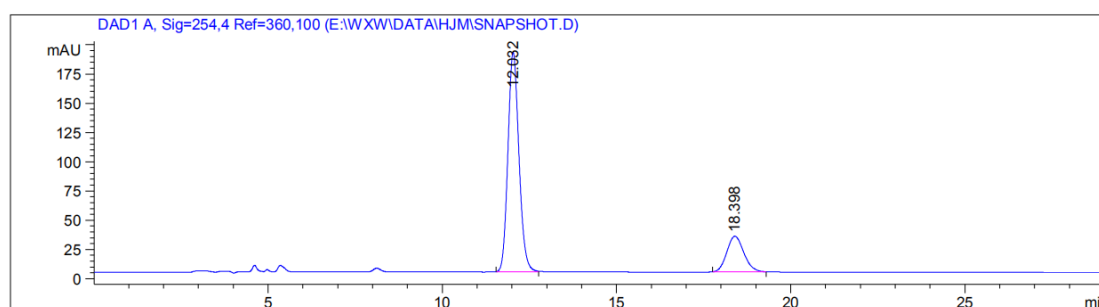

| Peak # | RetTime [min] | Type | Width [min] | Area [mAU*s] | Height [mAU] | Area %  |
|--------|---------------|------|-------------|--------------|--------------|---------|
| 1      | 12.032        | BB   | 0.3390      | 4137.33252   | 187.82994    | 79.8687 |
| 2      | 18.398        | BB   | 0.5259      | 1042.83301   | 30.57278     | 20.1313 |

ee = 70 (slower enantiomer), chiral promotor is DHQ-Bn

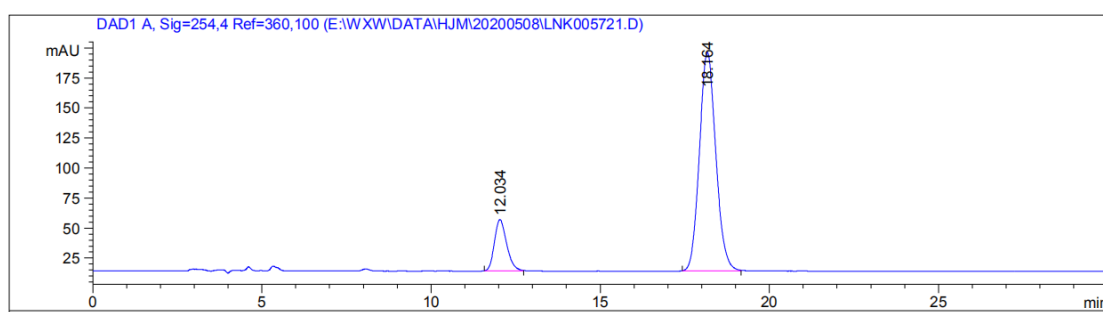

| Peak # | RetTime [min] | Type | Width [min] | Area [mAU*s] | Height [mAU] | Area %  |
|--------|---------------|------|-------------|--------------|--------------|---------|
| 1      | 12.034        | BB   | 0.3872      | 1075.07947   | 42.77799     | 14.9377 |
| 2      | 18.164        | BB   | 0.5204      | 6122.02441   | 181.99448    | 85.0623 |

***N*-(1-(*tert*-Butylamino)-2-fluoro-3-(4-methoxyphenyl)-1,3-dioxopropan-2-yl)-4-chloro-*N*-(4-methoxyphenyl)benzamide (12h)**

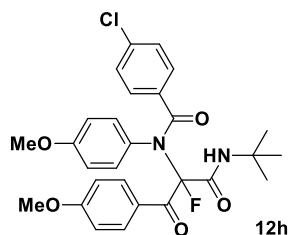

White solid; mp 103-105 °C;  $[\alpha]_D^{20} = +189.0$  (c 0.258, DCM, ee = 71 [faster enantiomer]);  $^1\text{H}$  NMR (400 MHz,  $\text{CDCl}_3$ )  $\delta$  8.37 (bd,  $J = 8.7$  Hz, 2H), 7.33 – 7.22 (m, 4H), 7.12 (d,  $J = 8.7$  Hz, 2H), 6.93 (d,  $J = 9.1$  Hz, 2H), 6.76 (d,  $J = 9.1$  Hz, 2H), 6.37 (bd,  $J = 5.3$  Hz, 1H), 3.84 (s, 3H), 3.75 (s, 3H), 1.07 (s, 9H);  $^{13}\text{C}$  NMR (100 MHz,  $\text{CDCl}_3$ )  $\delta$  187.5 (bd,  $J = 23.9$  Hz), 171.7, 163.4, 161.2 (d,  $J = 25.8$  Hz), 159.7, 136.9, 132.5, 132.22 (d,  $J = 3.2$  Hz), 132.0 (bs), 131.2 (d,  $J = 1.9$  Hz), 130.2, 128.3, 127.6, 102.60 (d,  $J = 236.0$  Hz), 55.53, 55.50, 52.0, 28.1;  $^{19}\text{F}$  NMR (377 MHz,  $\text{CDCl}_3$ )  $\delta$  -128.6 (bs); HRMS (ESI,  $[\text{M}+\text{H}]^+$ ) for  $\text{C}_{28}\text{H}_{29}\text{ClFN}_2\text{O}_5^+$  calcd. 527.1744, found 527.1749; HPLC analysis: chiral AD-H column, *i*PrOH/Hexanes = 20:80, flow rate: 1.0 mL/min, retention times are ~ 18 min (faster enantiomer) and ~ 26 min (slower enantiomer).

ee = 55 (slower enantiomer), chiral promotor is QD-Bn

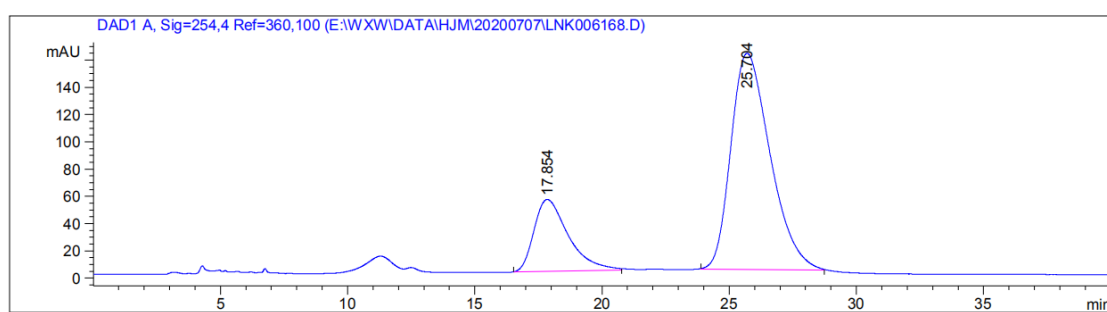

| Peak # | RetTime [min] | Type | Width [min] | Area [mAU*s] | Height [mAU] | Area %  |
|--------|---------------|------|-------------|--------------|--------------|---------|
| 1      | 17.854        | MM R | 1.5647      | 4959.39258   | 52.82526     | 22.5677 |
| 2      | 25.704        | BB   | 1.6417      | 1.70162e4    | 158.60370    | 77.4323 |

ee = 73 (faster enantiomer), chiral promotor is DHQ-Bn

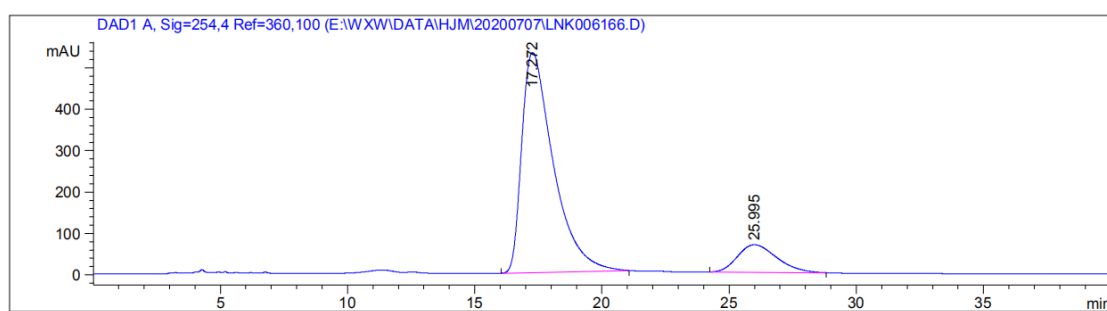

| Peak # | RetTime [min] | Type | Width [min] | Area [mAU*s] | Height [mAU] | Area %  |
|--------|---------------|------|-------------|--------------|--------------|---------|
| 1      | 17.272        | BB   | 1.2695      | 4.59521e4    | 531.04010    | 86.4561 |
| 2      | 25.995        | BB   | 1.5765      | 7198.70166   | 66.73314     | 13.5439 |

***N*-(1-(Butylamino)-2-fluoro-1,3-dioxo-3-phenylpropan-2-yl)-*N*-phenylbenzamide (12i)**

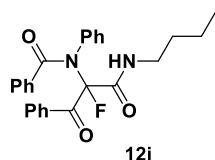

White solid; mp 117 – 119 °C;  $[\alpha]_D^{20} = +162.9$  (c 0.269, DCM, ee = 55 [faster enantiomer]);  $^1\text{H}$  NMR (400 MHz,  $\text{CDCl}_3$ )  $\delta$  8.43 – 8.34 (m, 2H), 7.56 – 7.49 (m, 1H), 7.49 – 7.42 (m, 2H), 7.41 – 7.35 (m, 2H), 7.31 – 7.19 (m, 6H), 7.16 – 7.09 (m, 2H), 6.64 – 6.54 (m, 1H), 3.16 – 3.05 (m, 1H), 2.99 – 2.87 (m, 1H), 1.19 – 1.08 (m, 2H), 1.06 – 0.94 (m, 2H), 0.75 (t,  $J = 7.2$  Hz, 3H);  $^{13}\text{C}$  NMR (100 MHz,  $\text{CDCl}_3$ )  $\delta$  172.7, 162.2 (d,  $J = 27.1$  Hz), 138.8 (d,  $J = 2.0$  Hz), 134.9, 133.7, 132.9, 130.9, 130.7 (bs), 129.8 (d,

$J = 2.9$  Hz), 129.0, 128.7, 128.2, 128.0, 102.79 (d,  $J = 235.1$  Hz), 39.6, 30.9, 19.7, 13.7;  $^{19}\text{F}$  NMR (377 MHz,  $\text{CDCl}_3$ )  $\delta$  -126.0 (bs); HRMS (ESI,  $[\text{M}+\text{Na}]^+$ ) for  $\text{C}_{26}\text{H}_{25}\text{FN}_2\text{O}_3\text{Na}^+$  calcd. 455.1741, found 455.1739; HPLC analysis: chiral AD-H column,  $i\text{PrOH/Hexanes} = 10:90$ , flow rate: 1.0 mL/min, retention times are  $\sim 30$  min (faster enantiomer) and  $\sim 36$  min (slower enantiomer).

ee = 29 (slower enantiomer), chiral promotor is QD-Bn

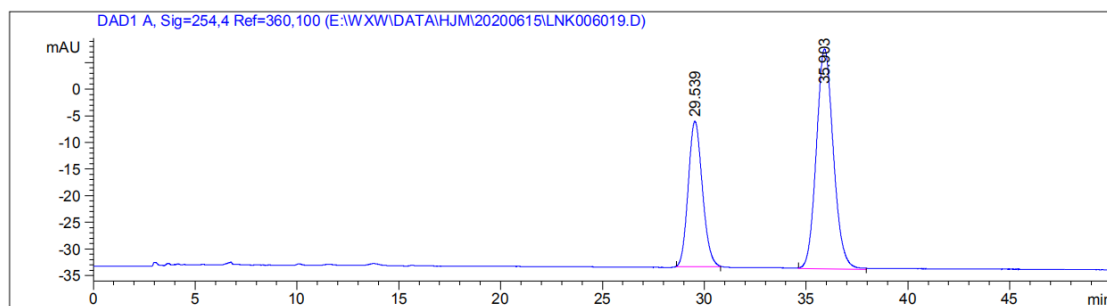

| Peak # | RetTime [min] | Type | Width [min] | Area [mAU*s] | Height [mAU] | Area %  |
|--------|---------------|------|-------------|--------------|--------------|---------|
| 1      | 29.539        | BB   | 0.7340      | 1320.68848   | 27.31943     | 35.4344 |
| 2      | 35.903        | MM R | 0.9704      | 2406.45044   | 41.32970     | 64.5656 |

ee = 55 (faster enantiomer), chiral promotor is QD

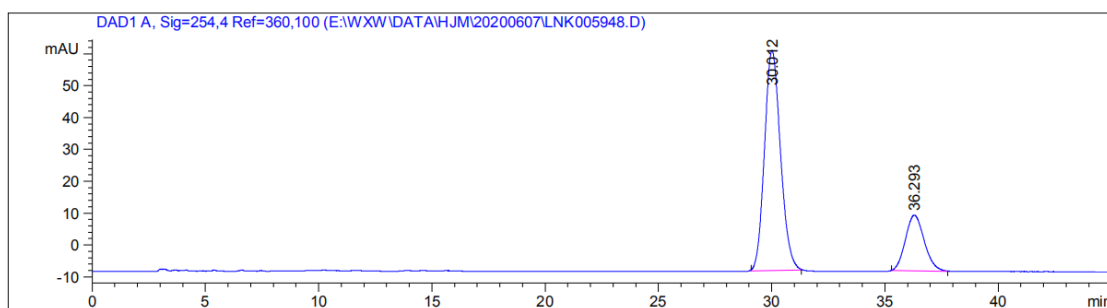

| Peak # | RetTime [min] | Type | Width [min] | Area [mAU*s] | Height [mAU] | Area %  |
|--------|---------------|------|-------------|--------------|--------------|---------|
| 1      | 30.012        | BB   | 0.7542      | 3402.79053   | 69.14426     | 77.1316 |
| 2      | 36.293        | BB   | 0.8522      | 1008.87598   | 17.45934     | 22.8684 |

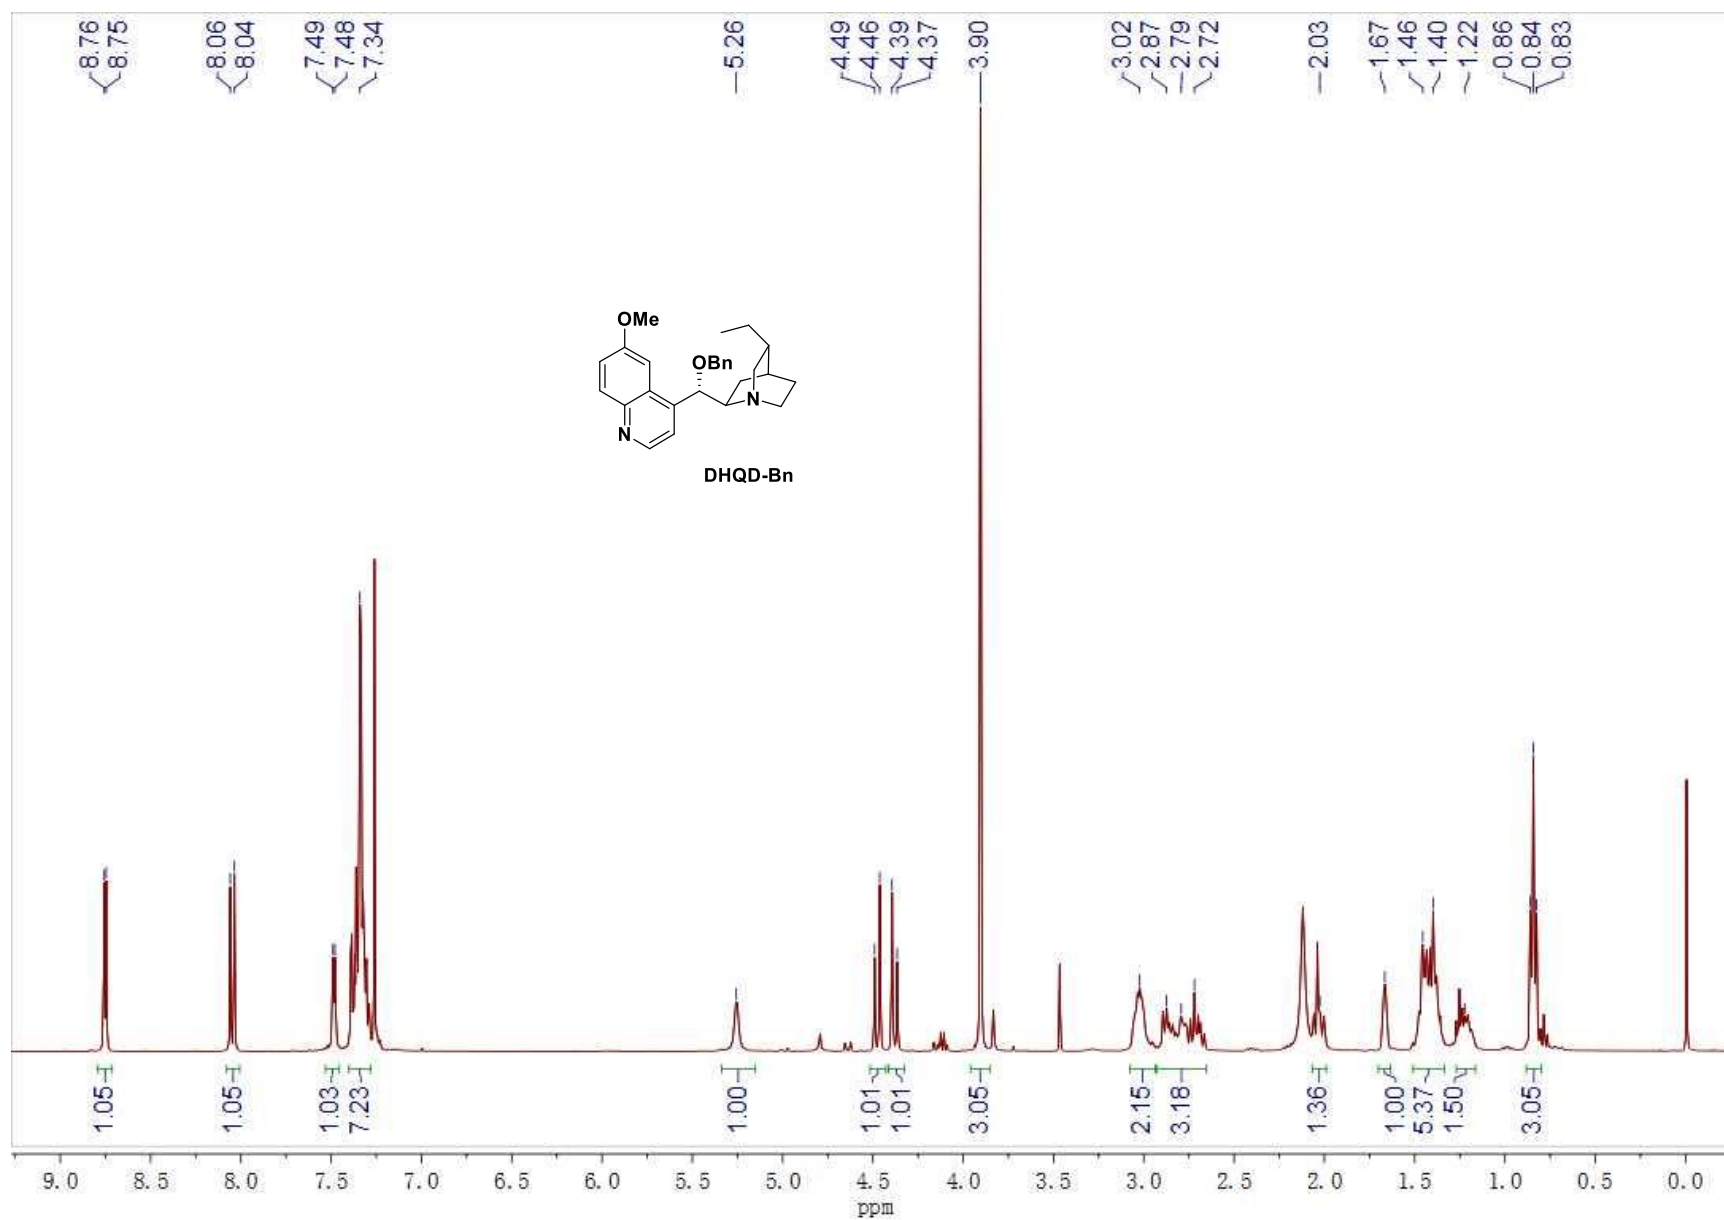

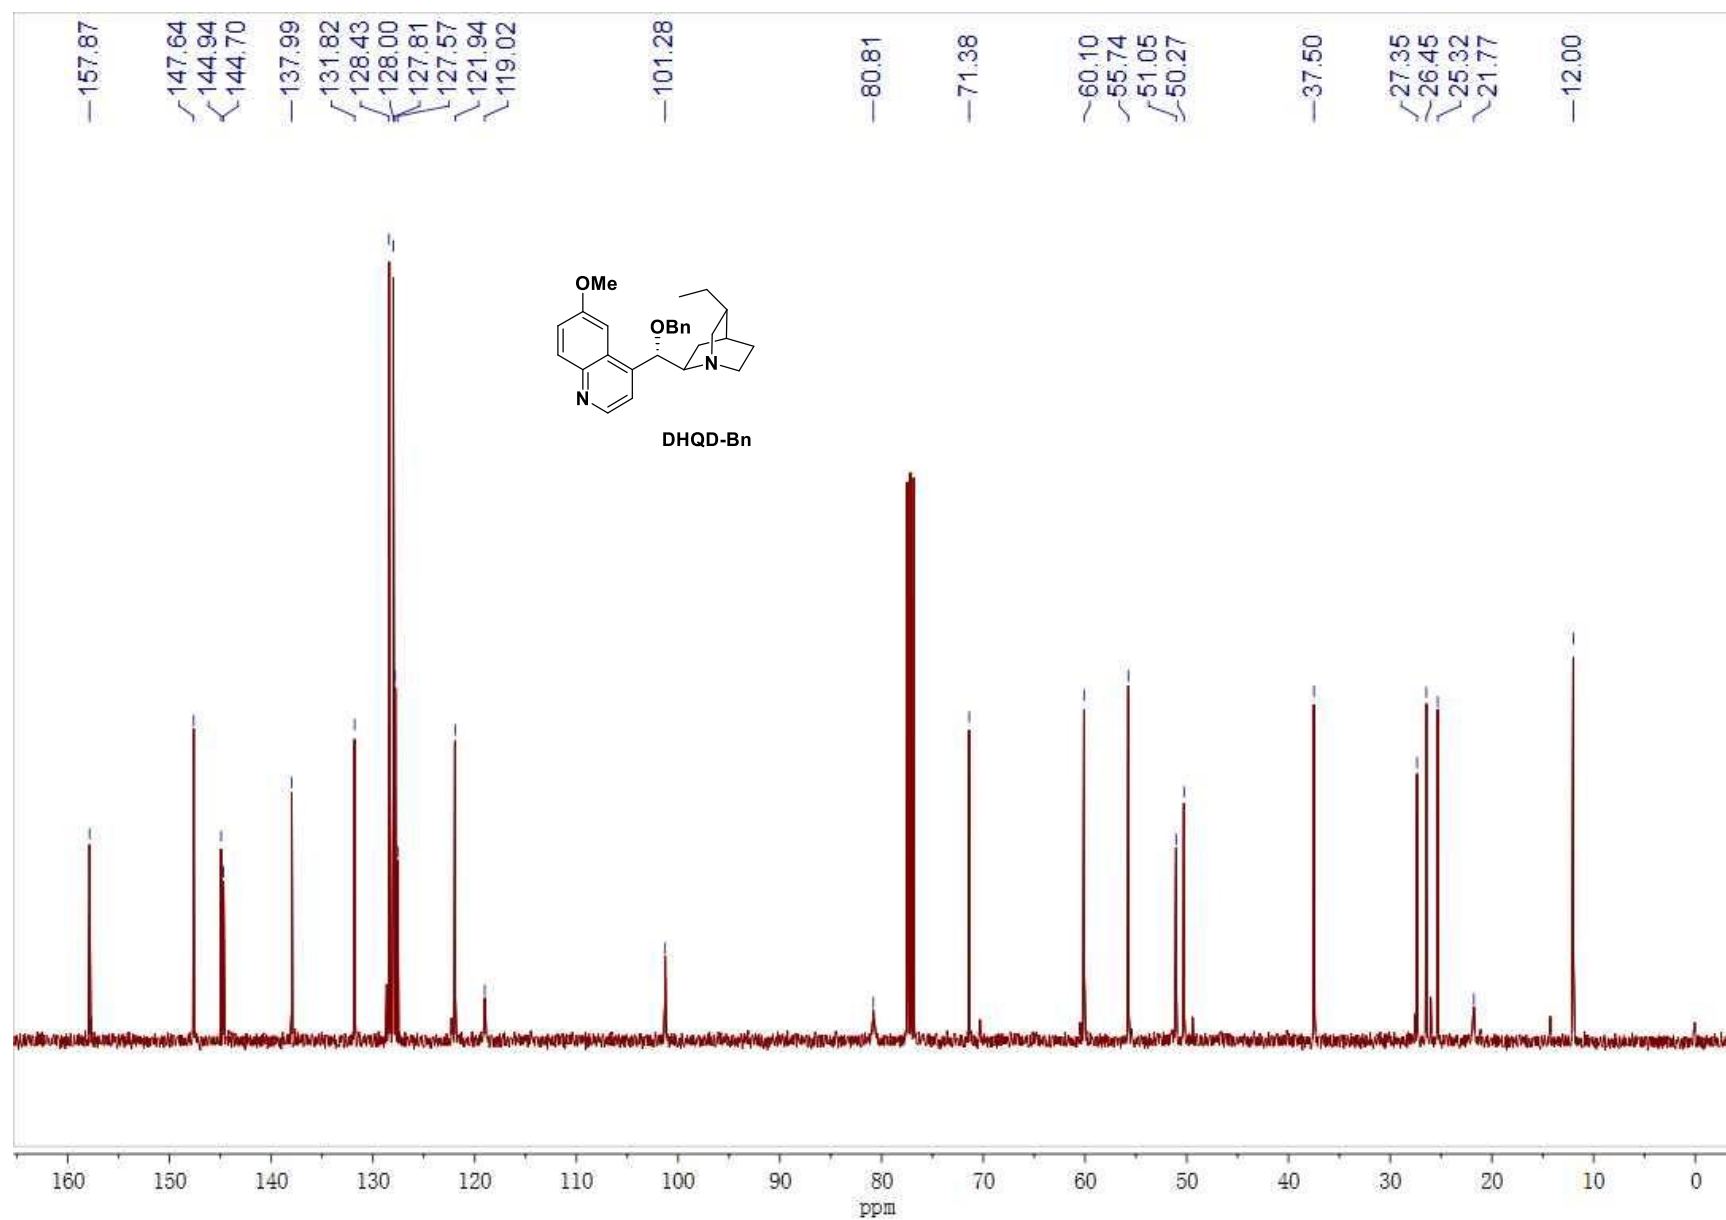

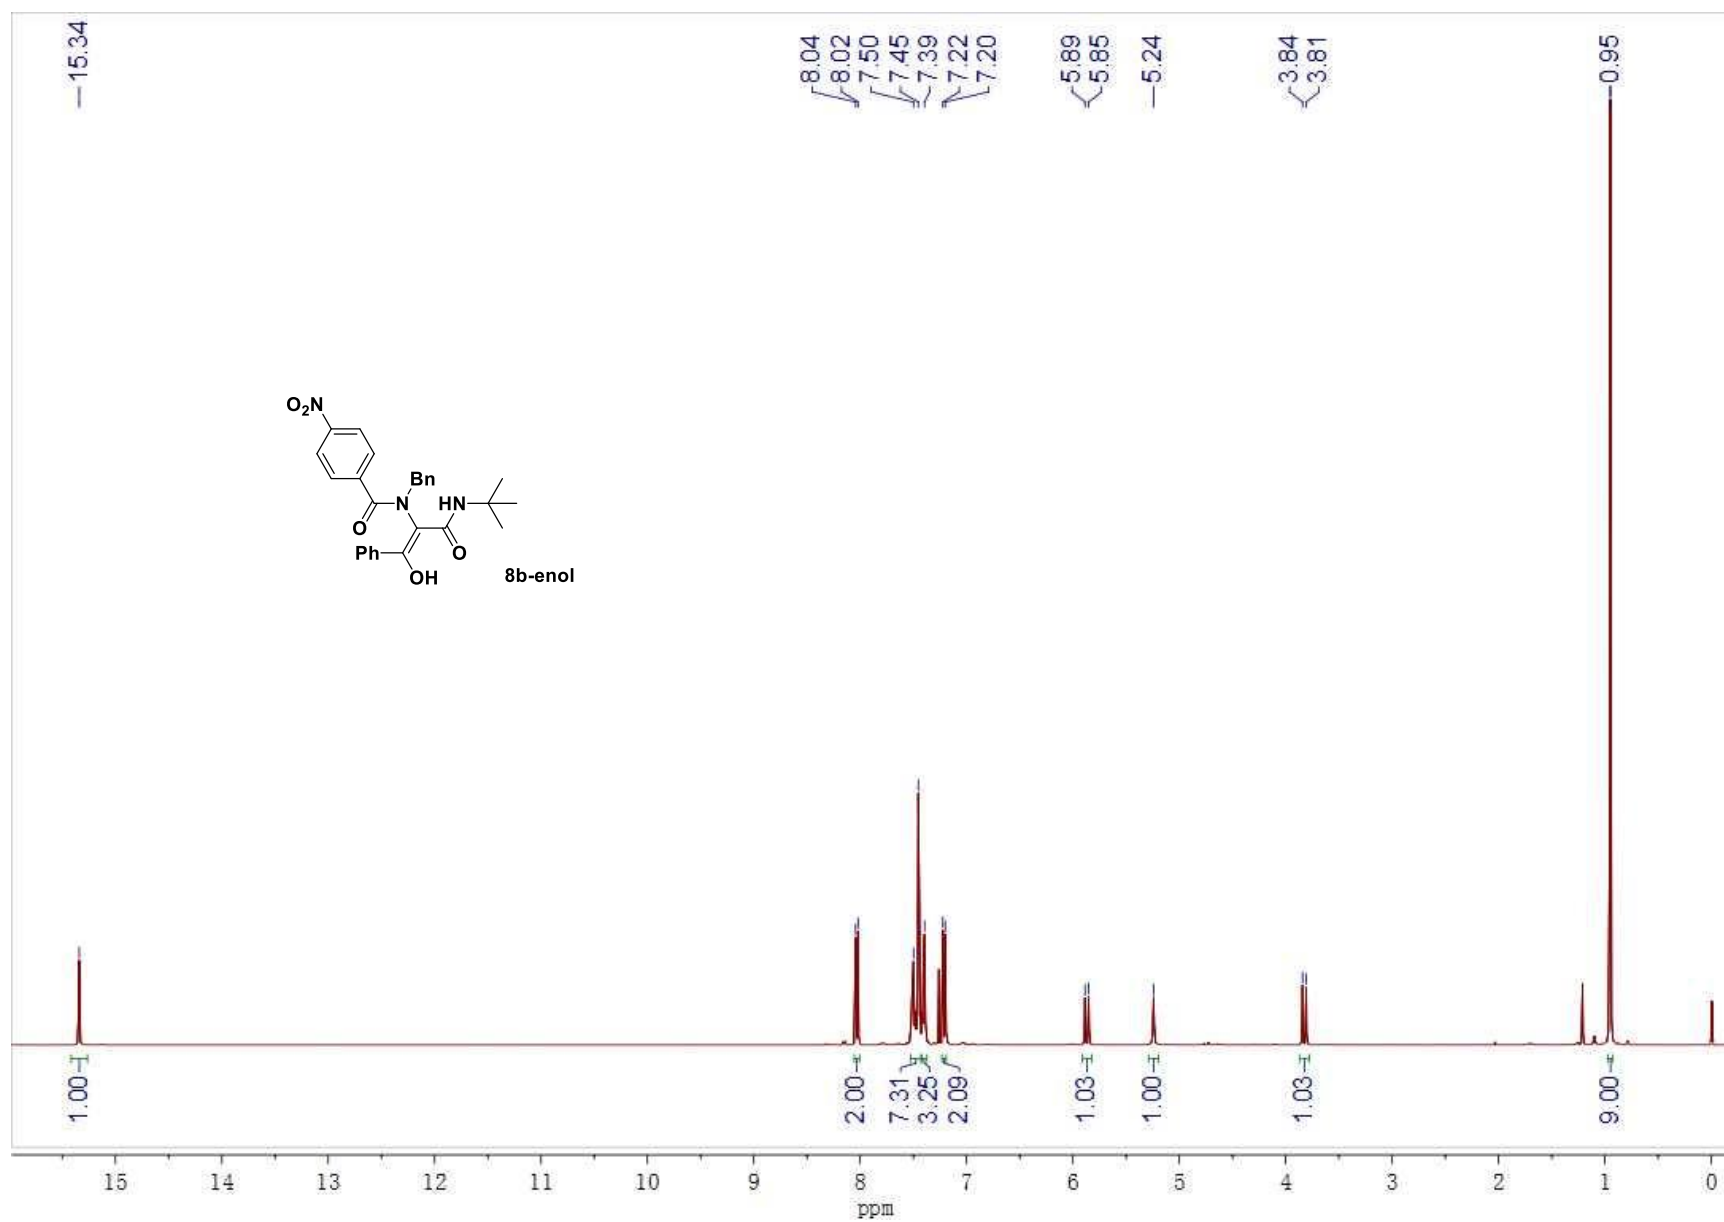

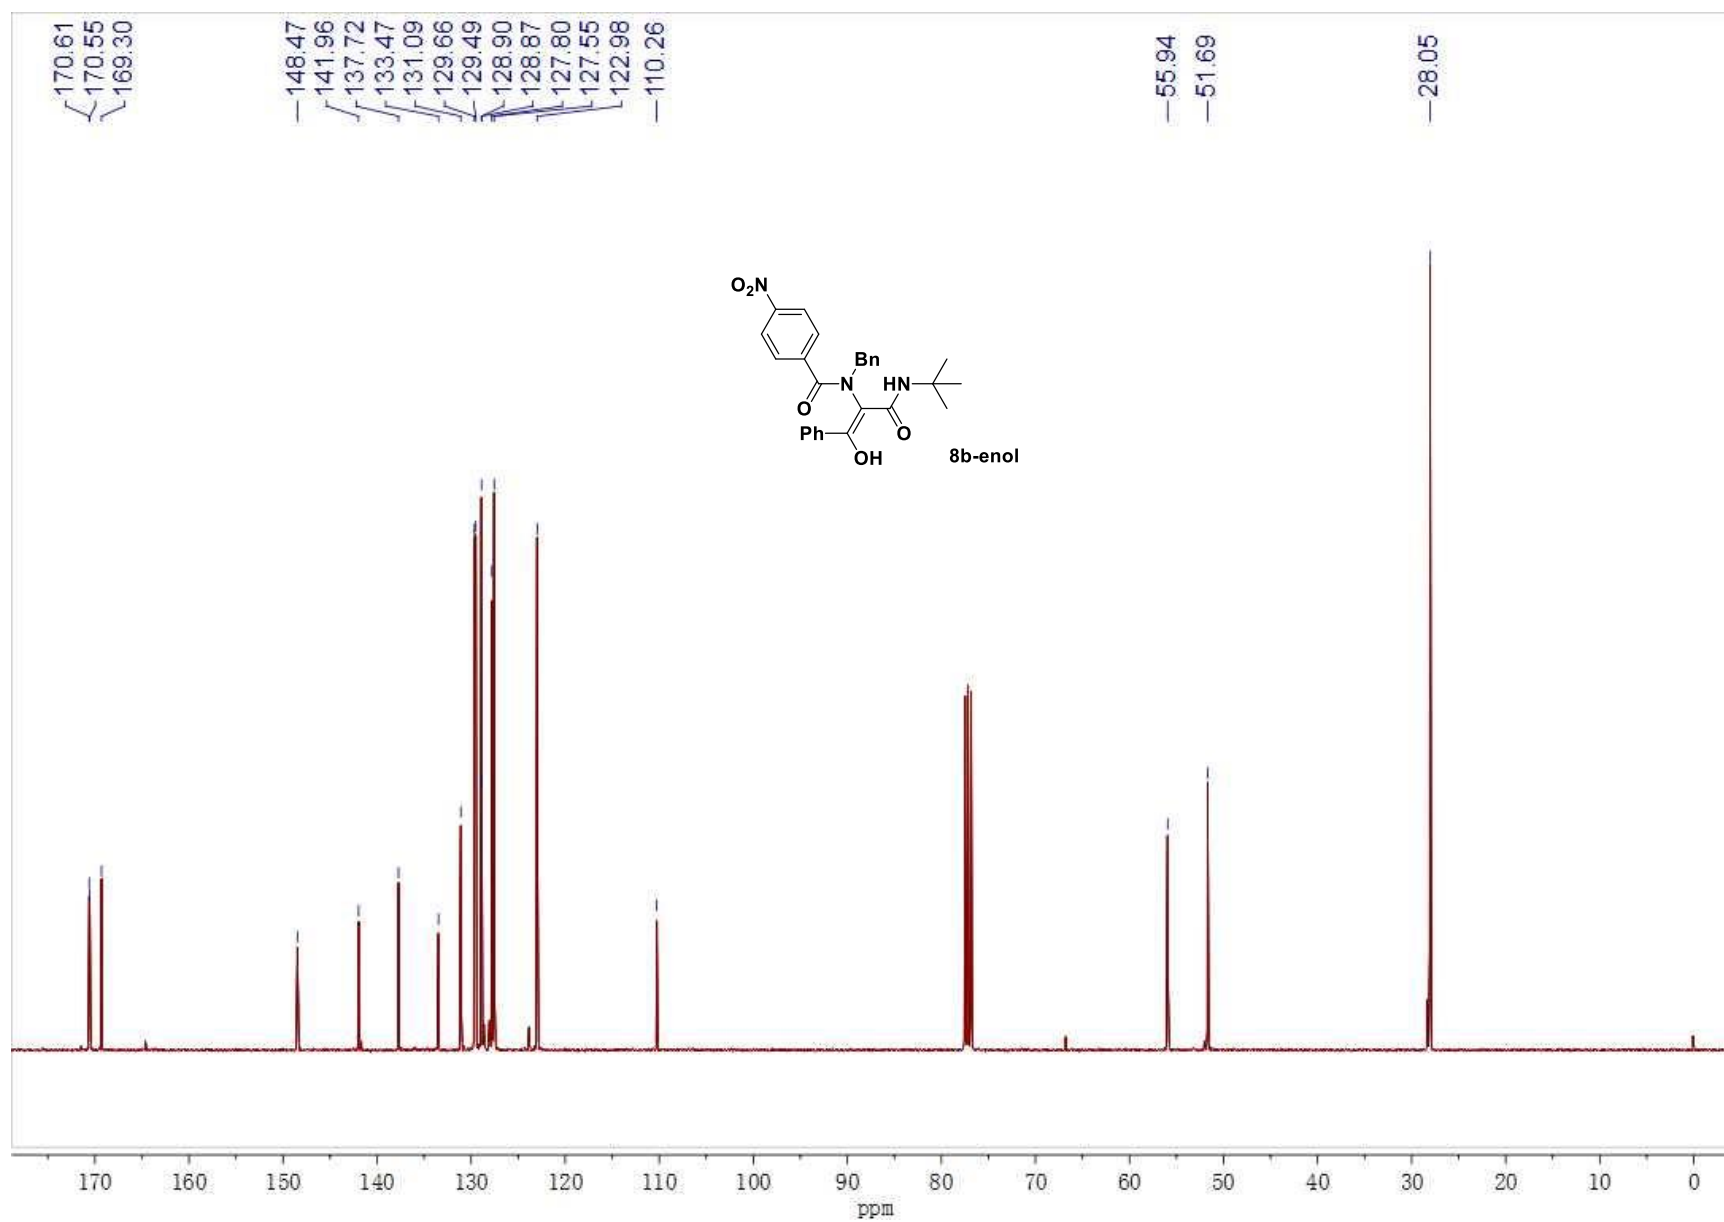

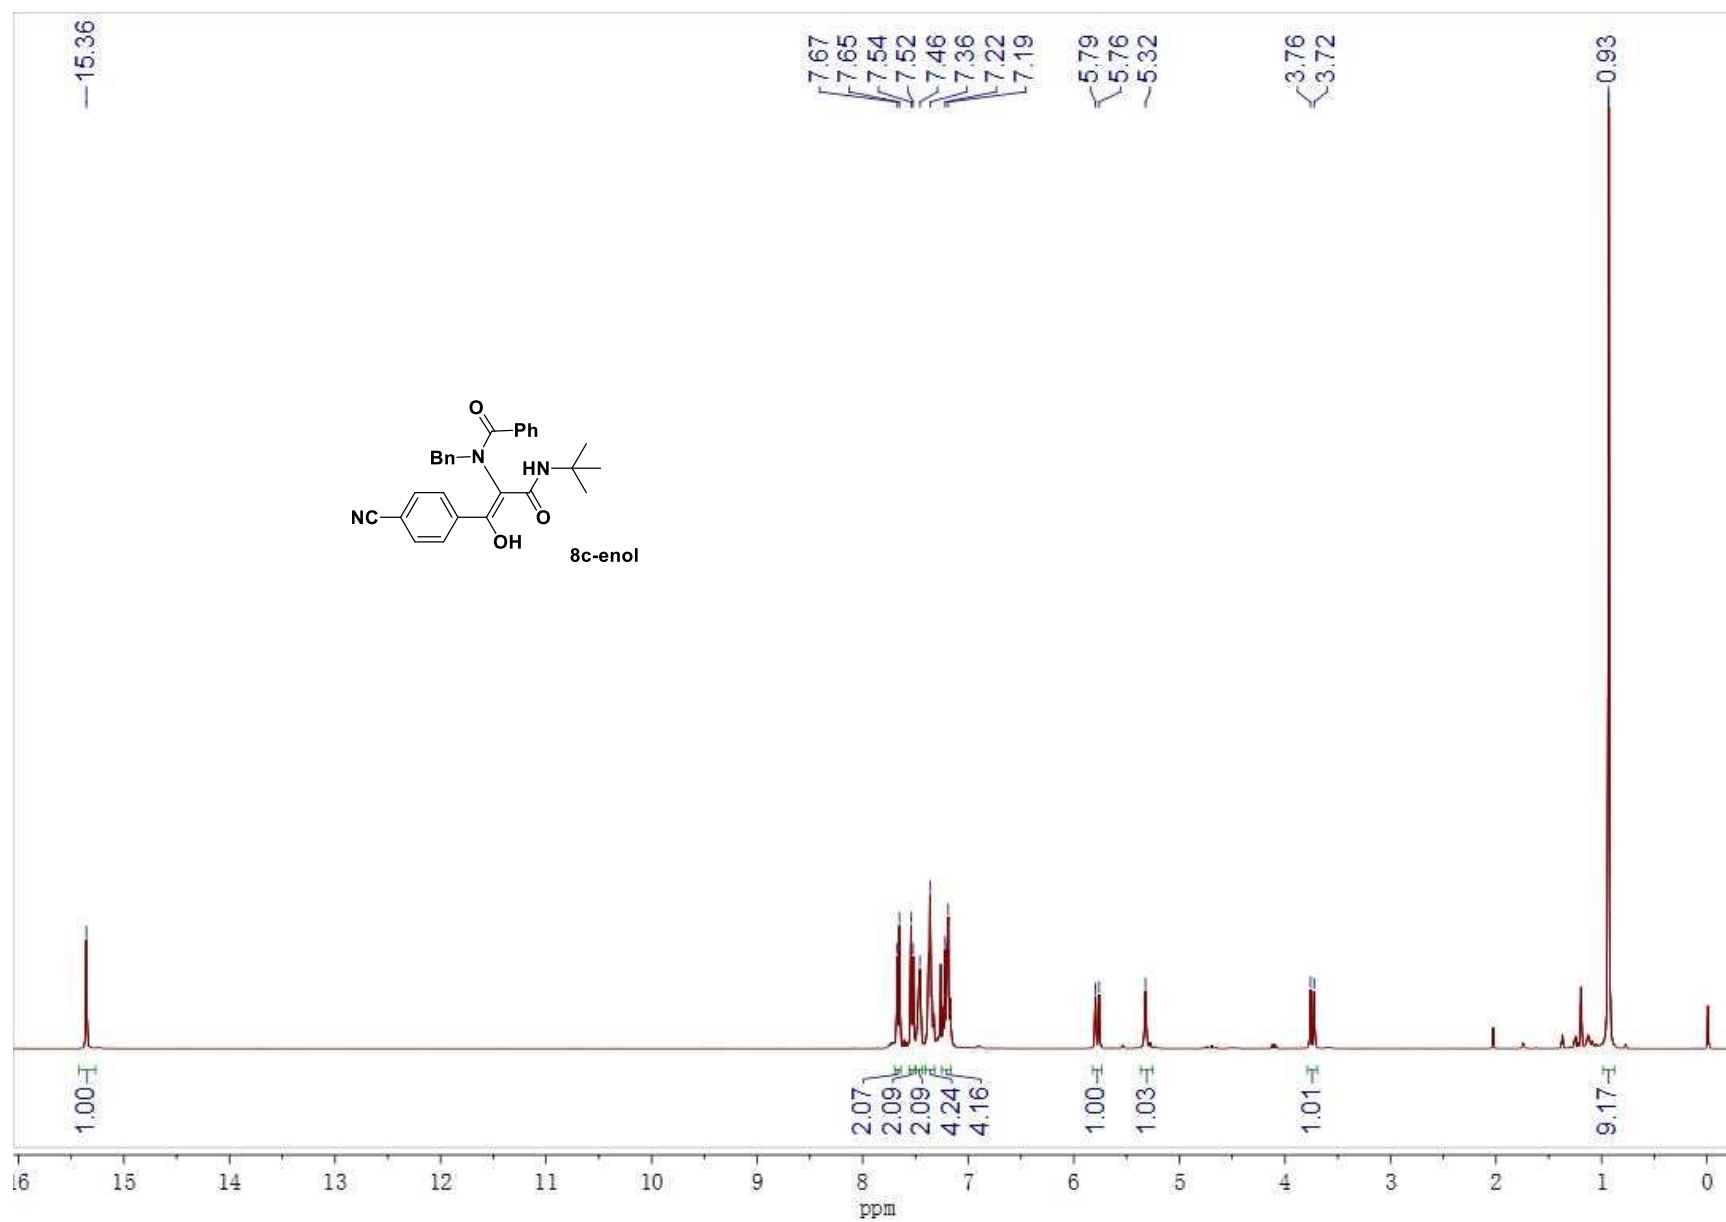

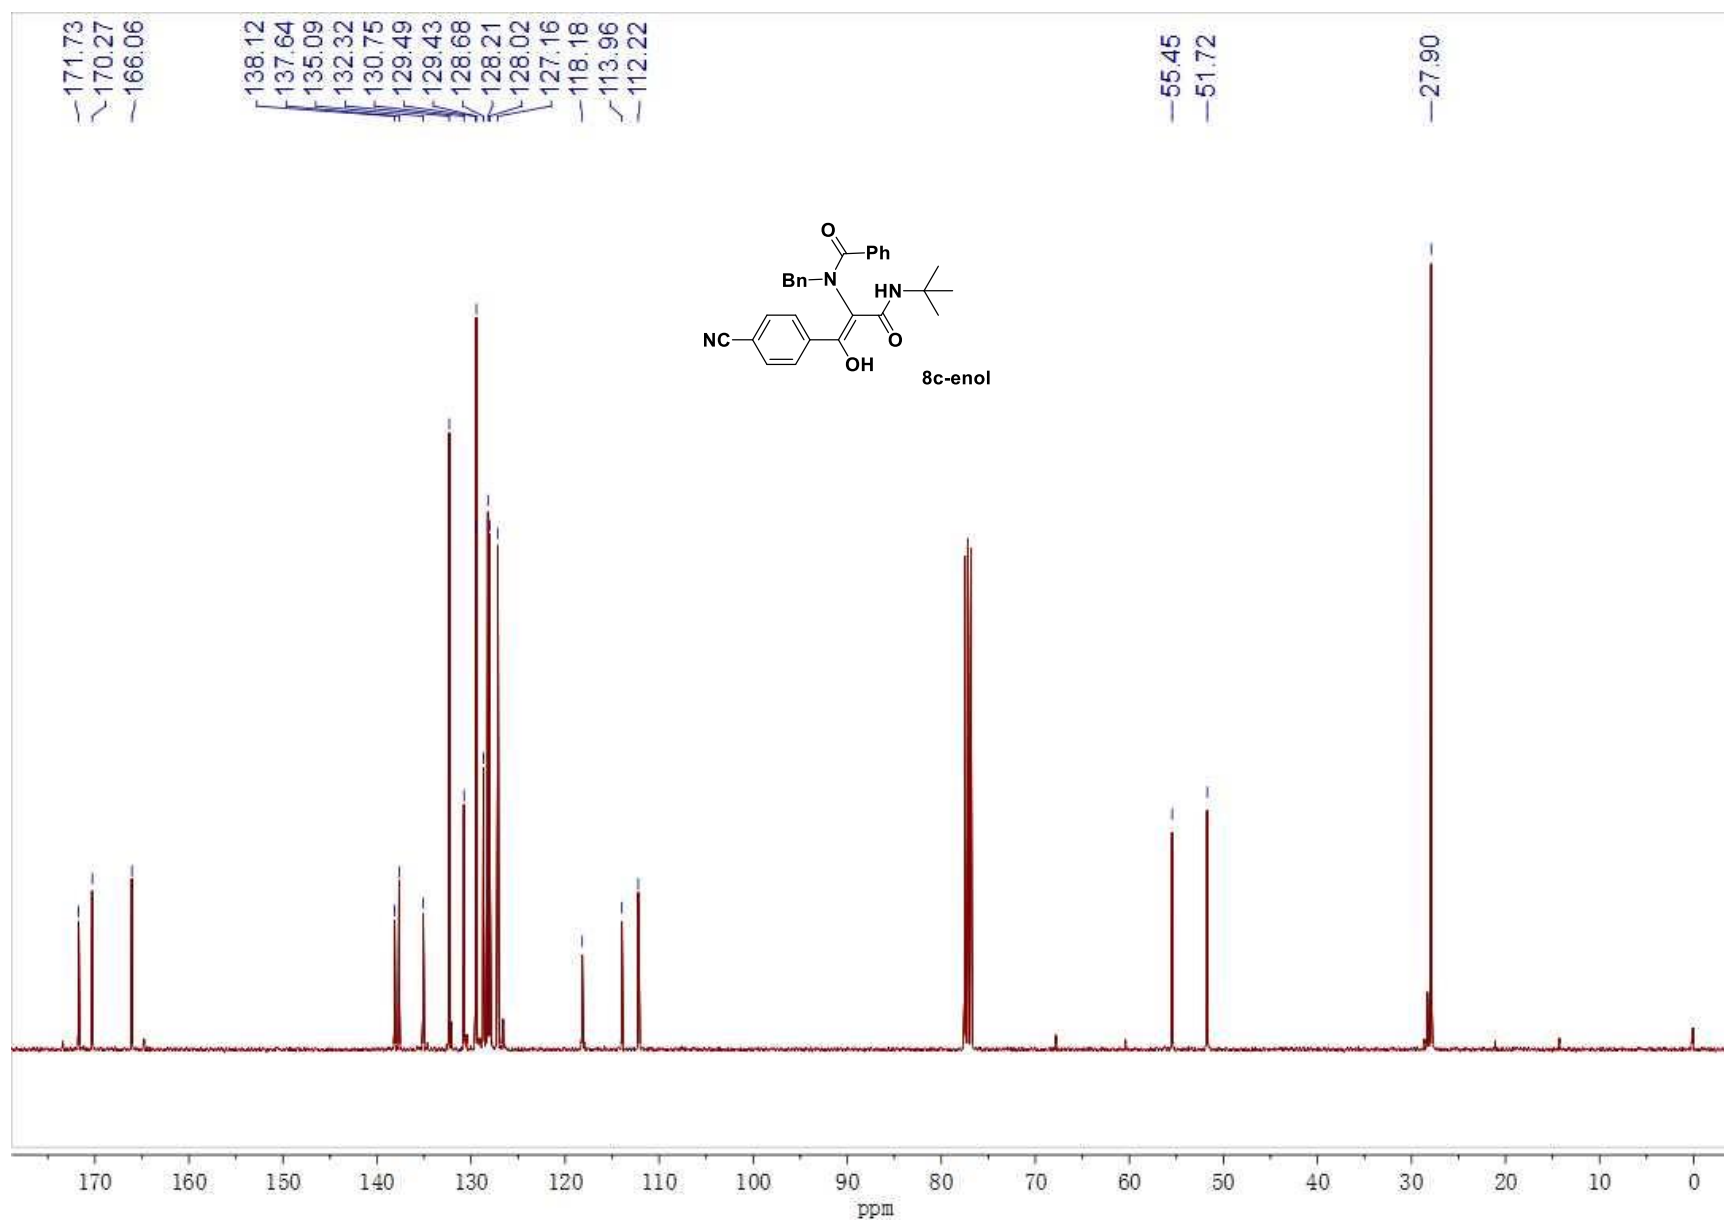

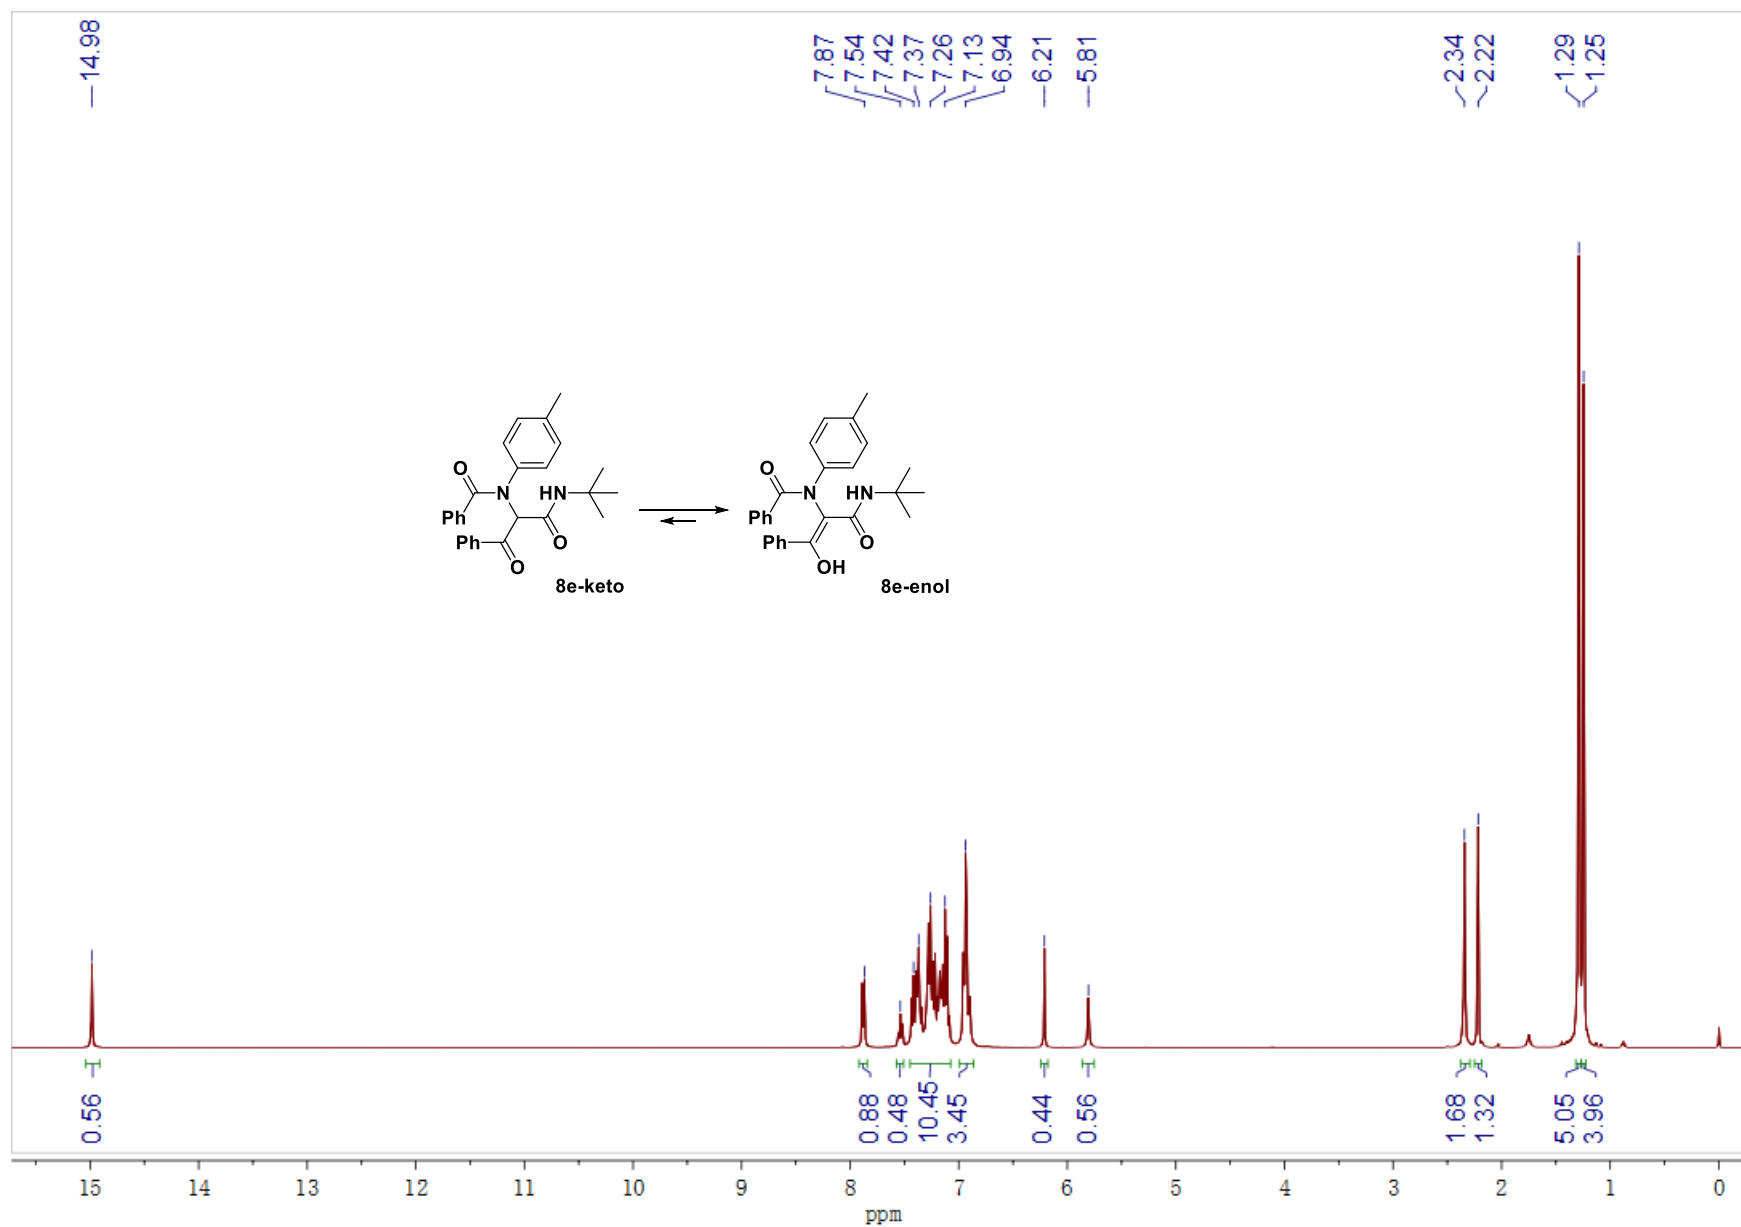

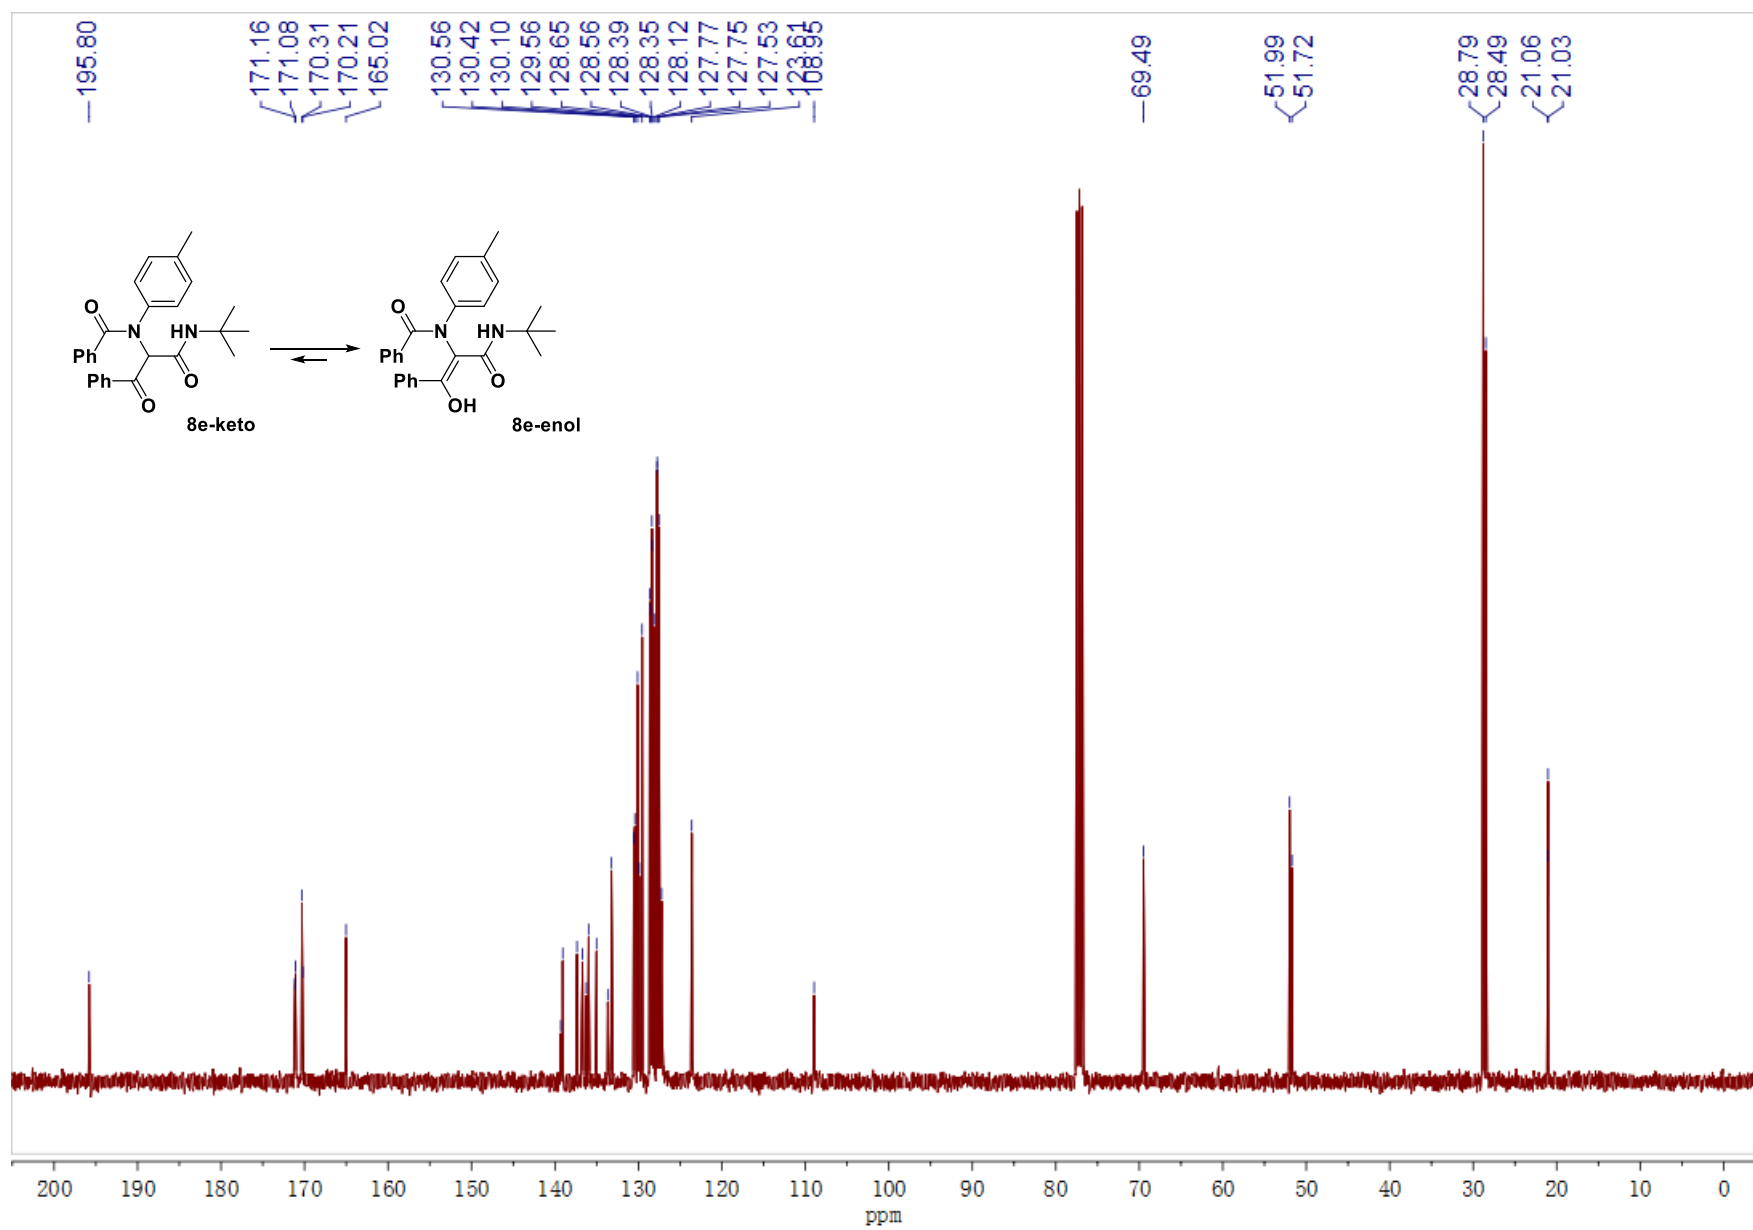

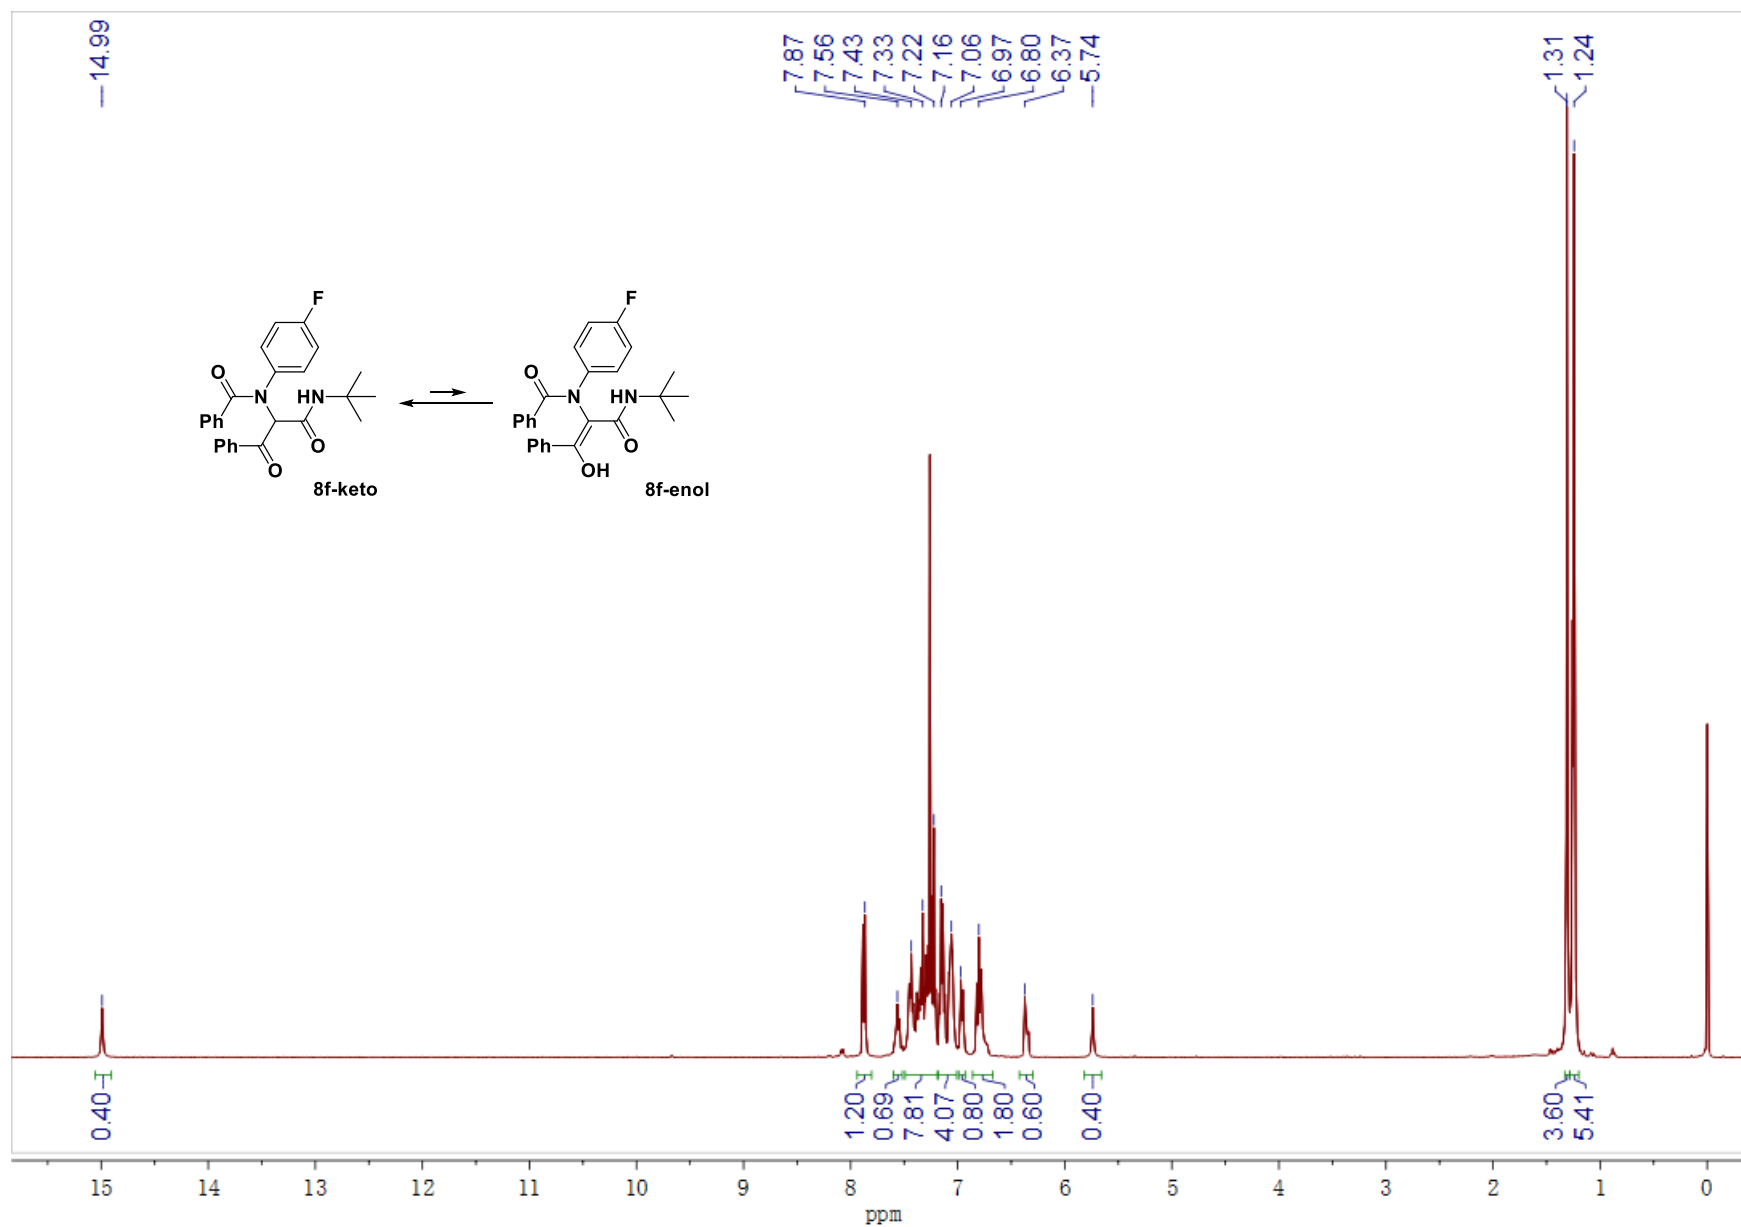

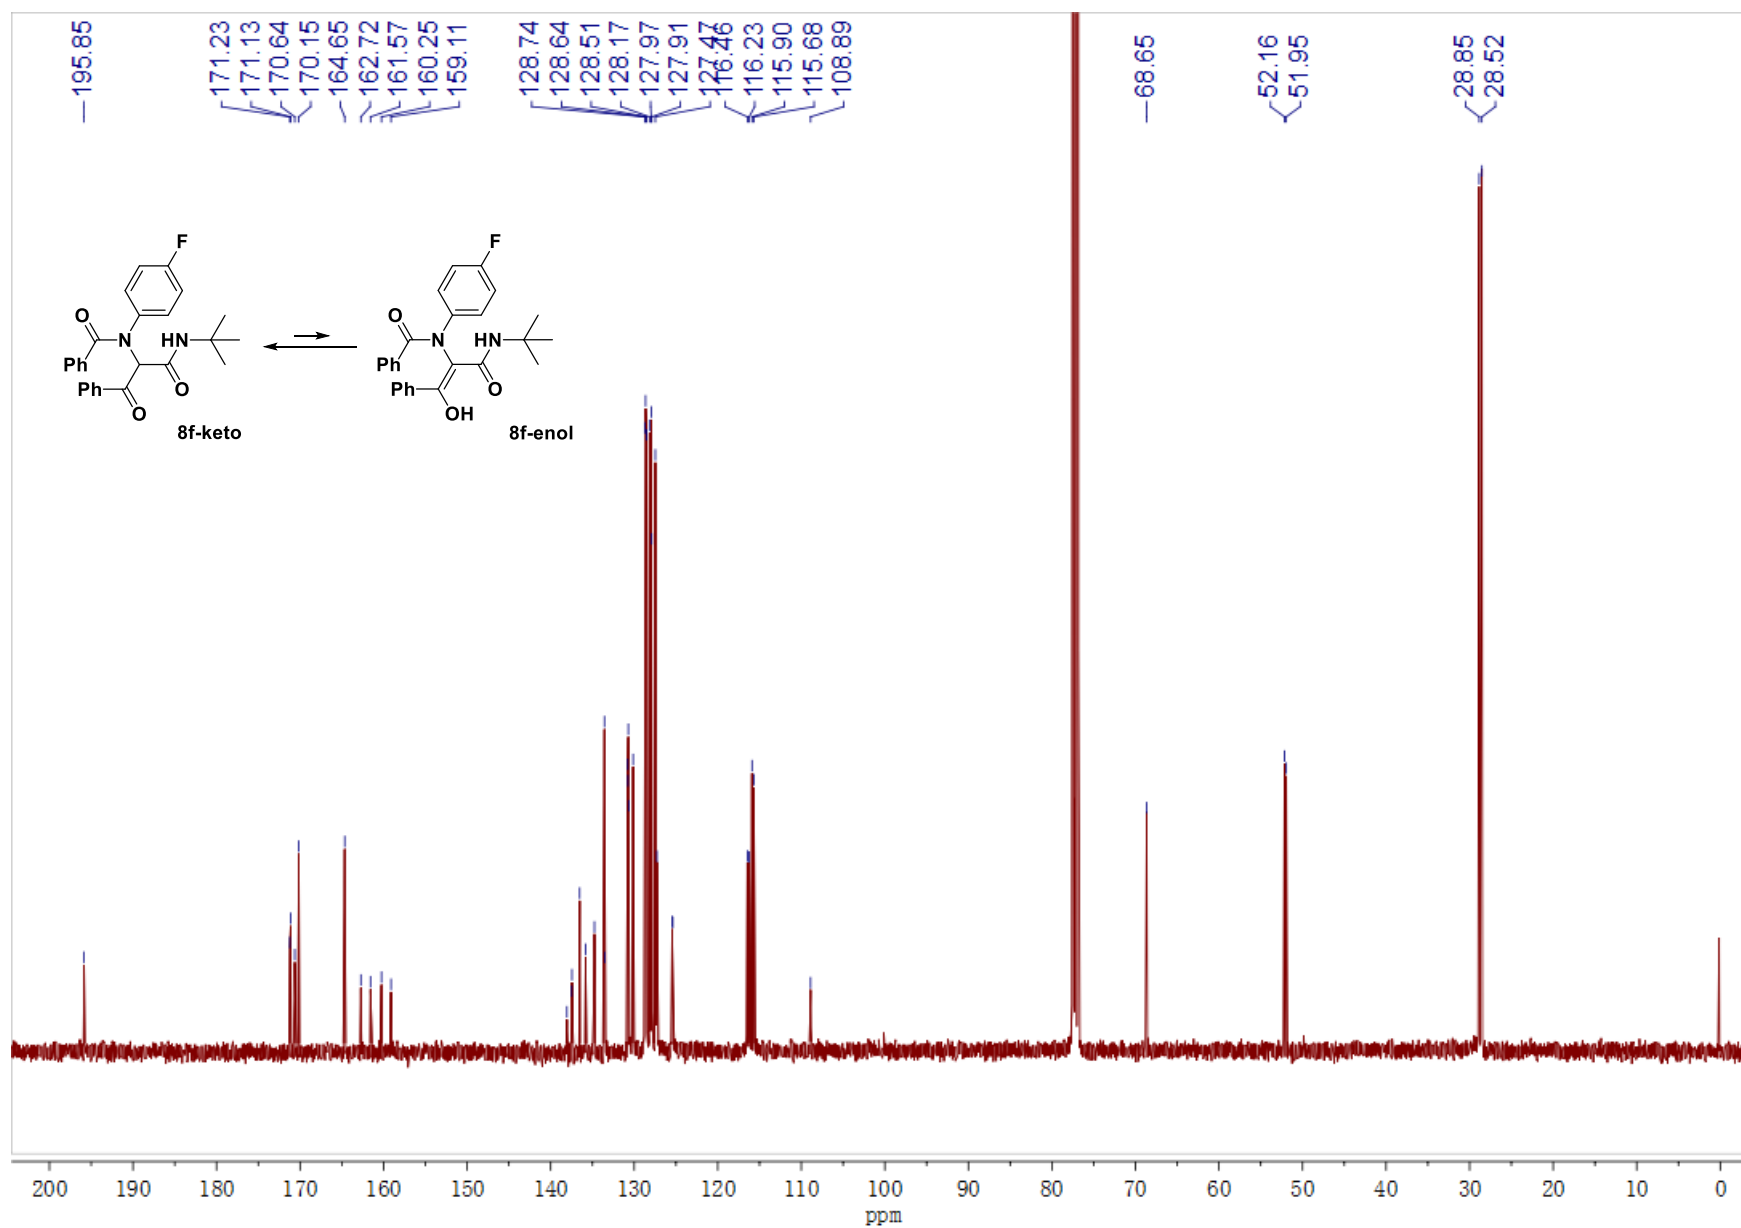

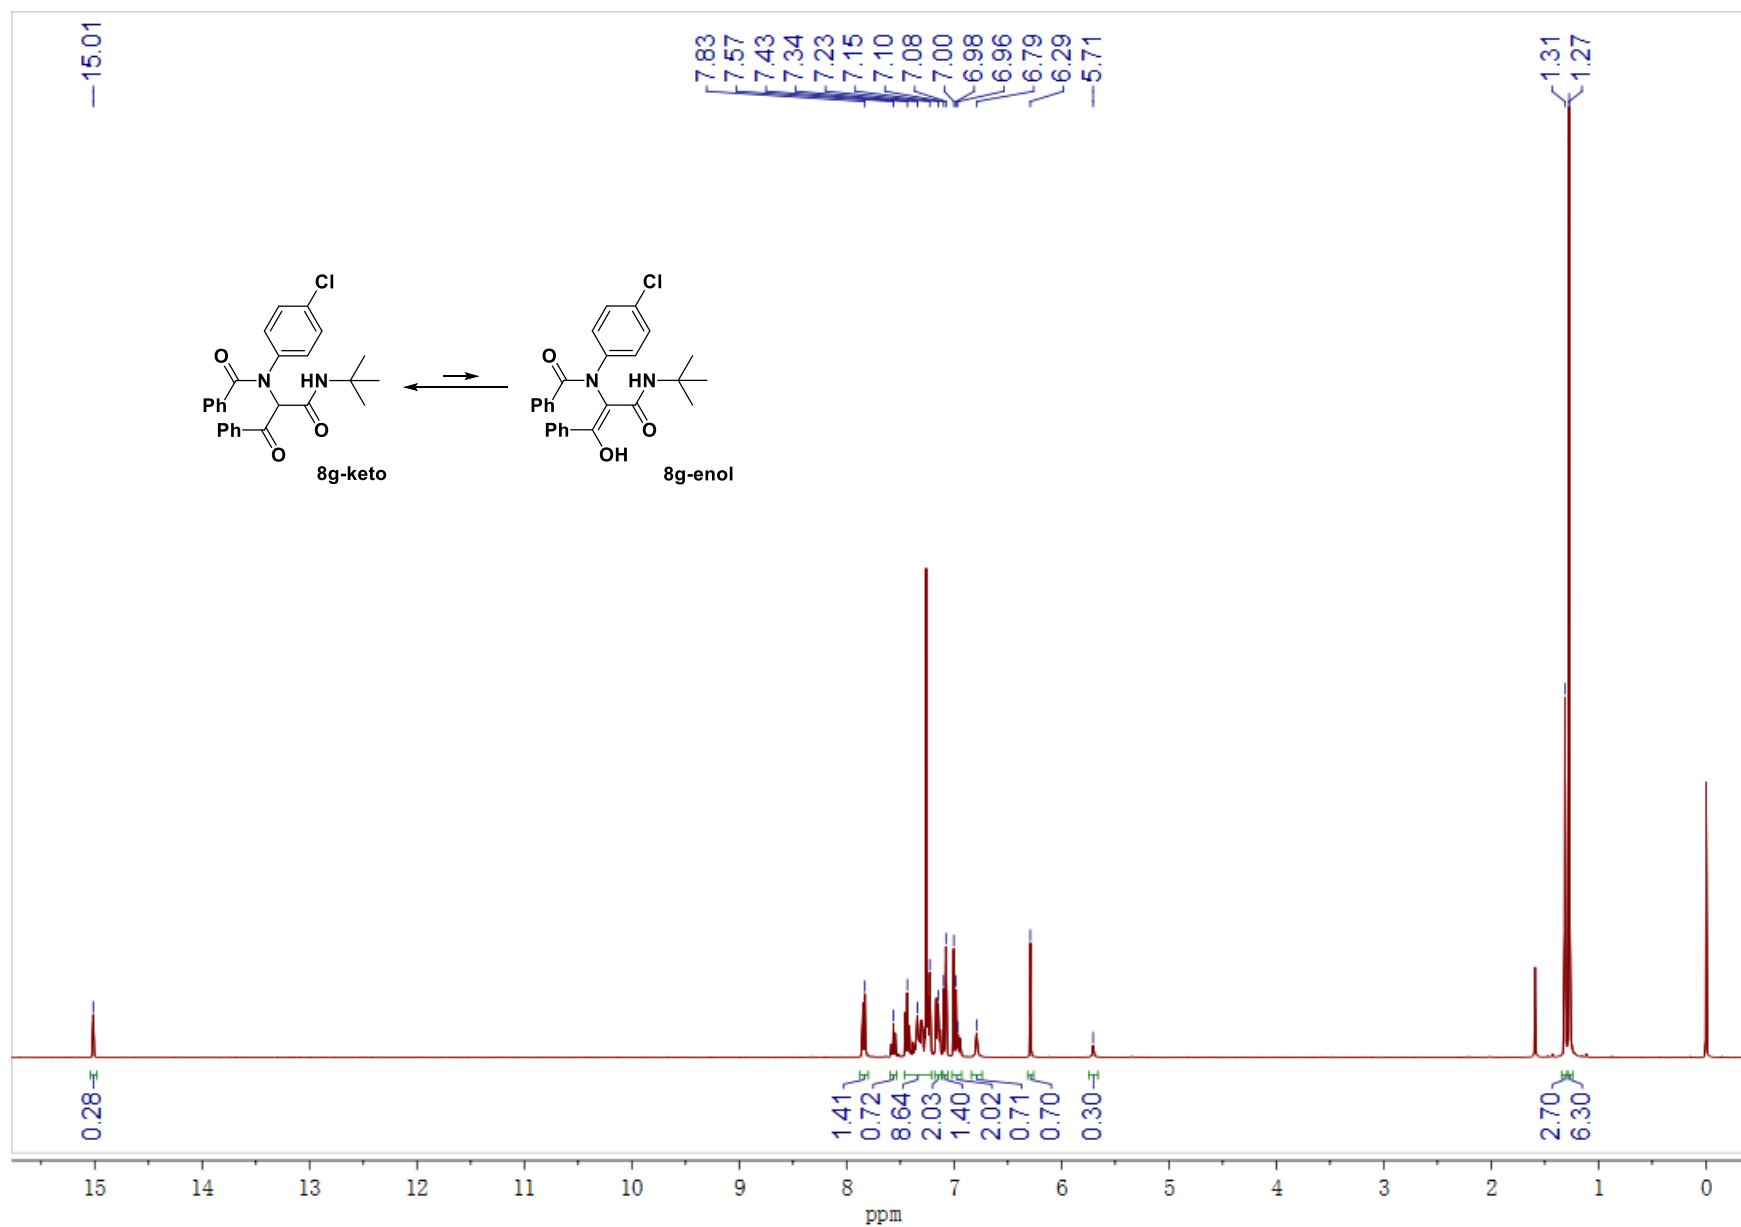

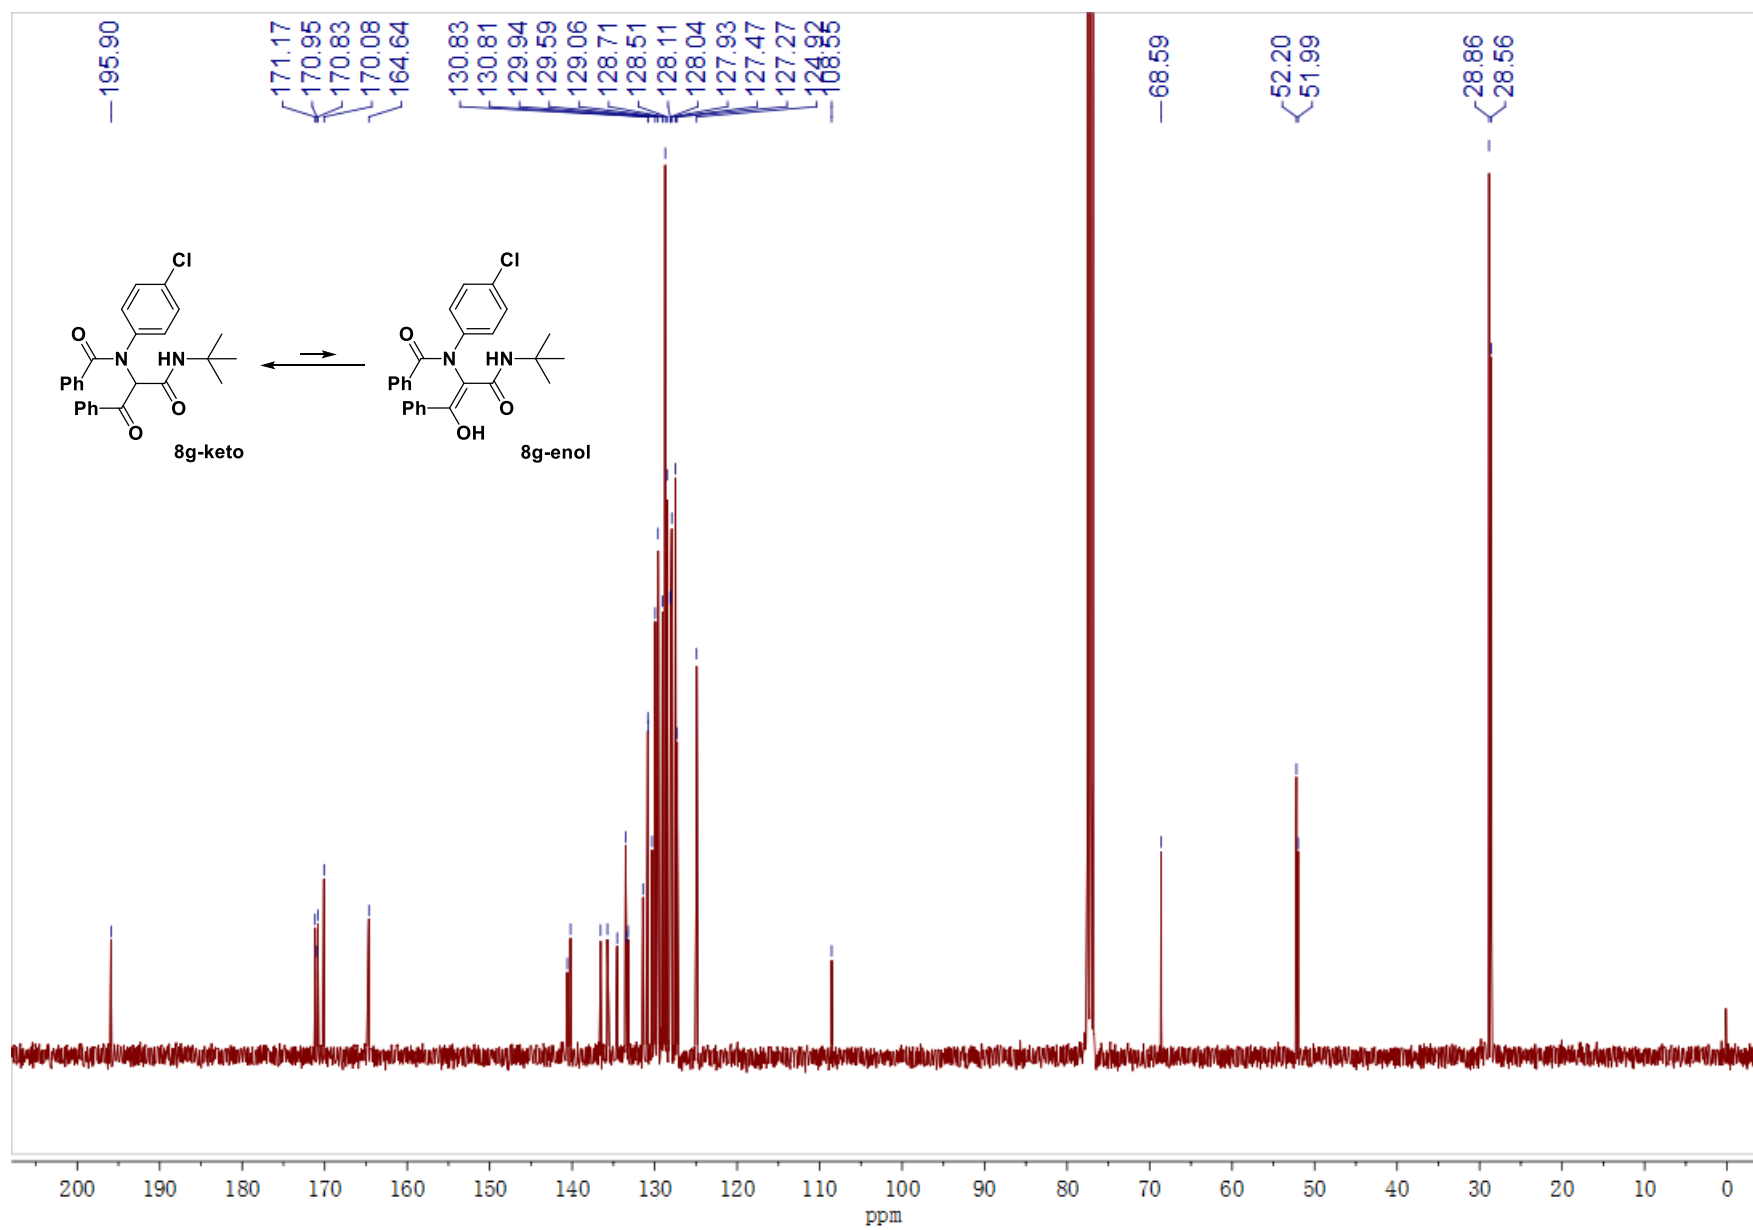

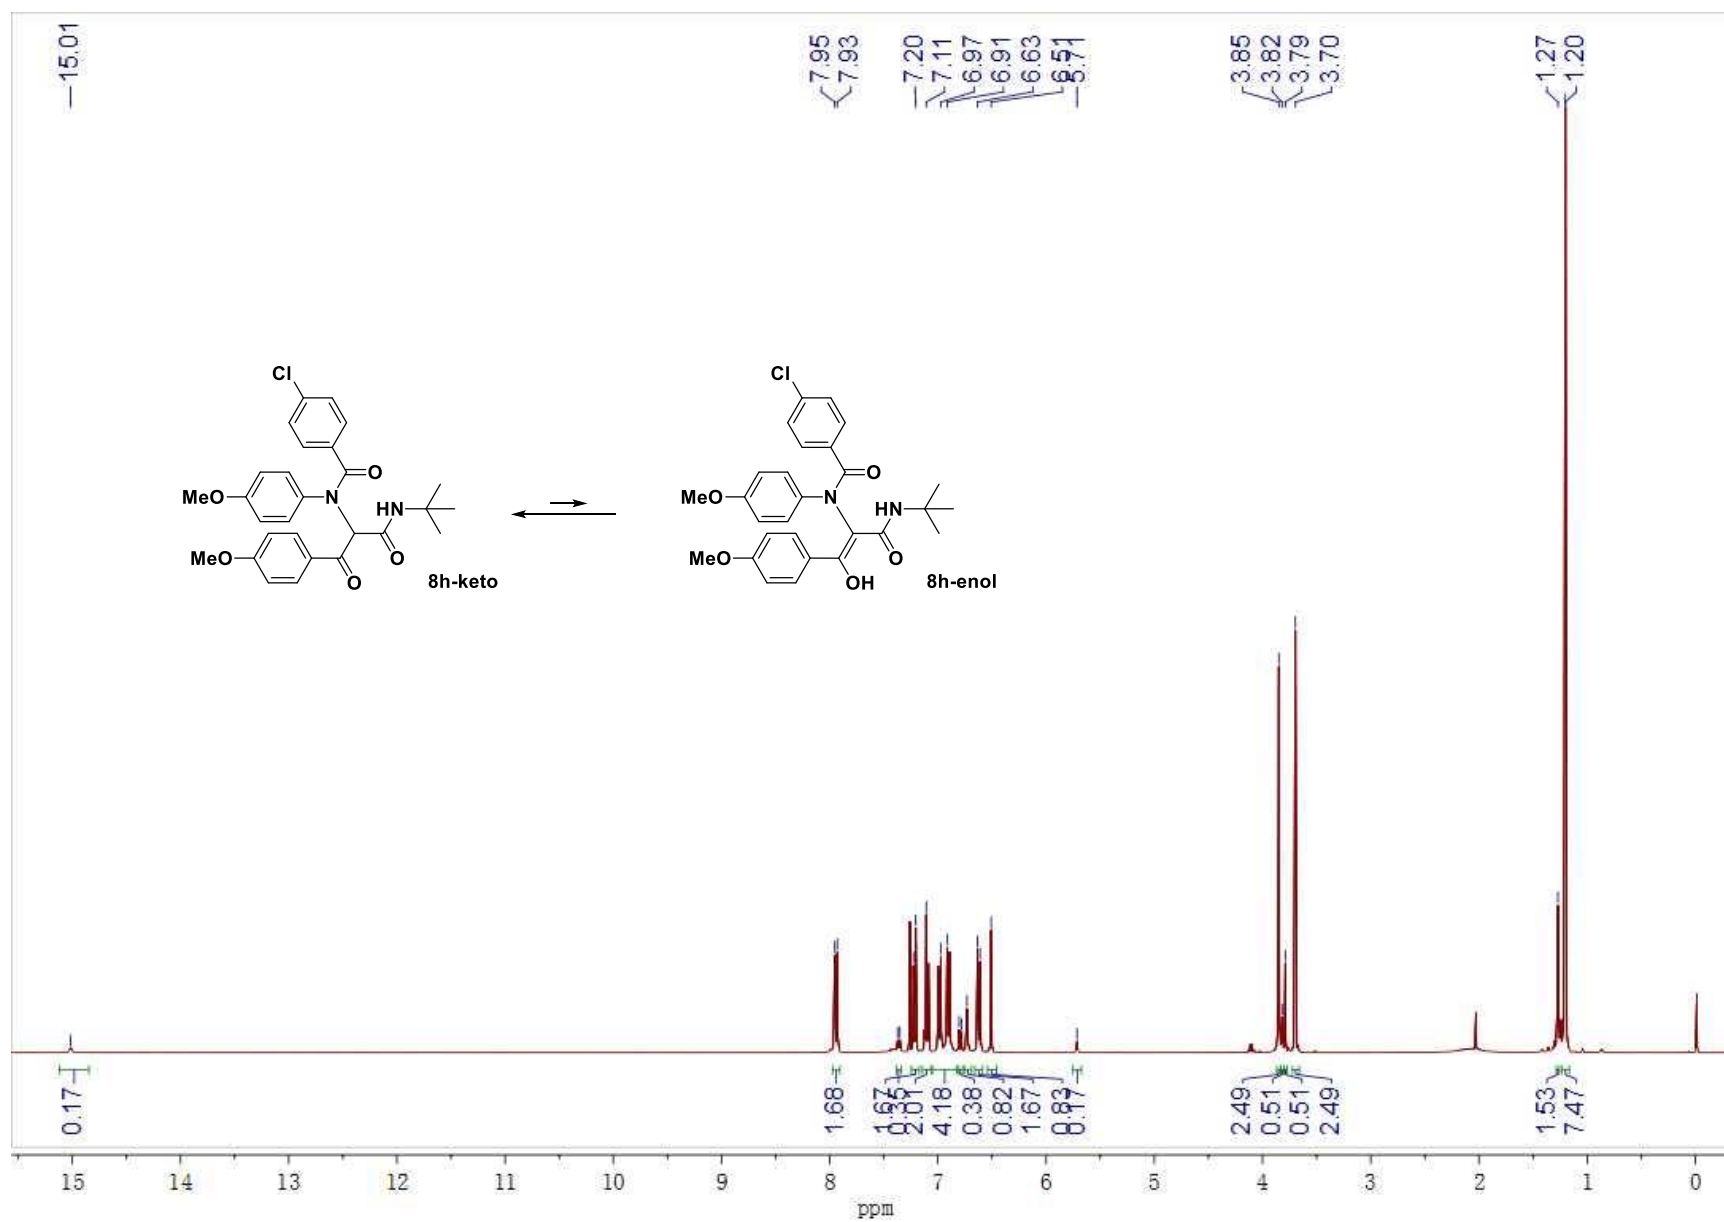

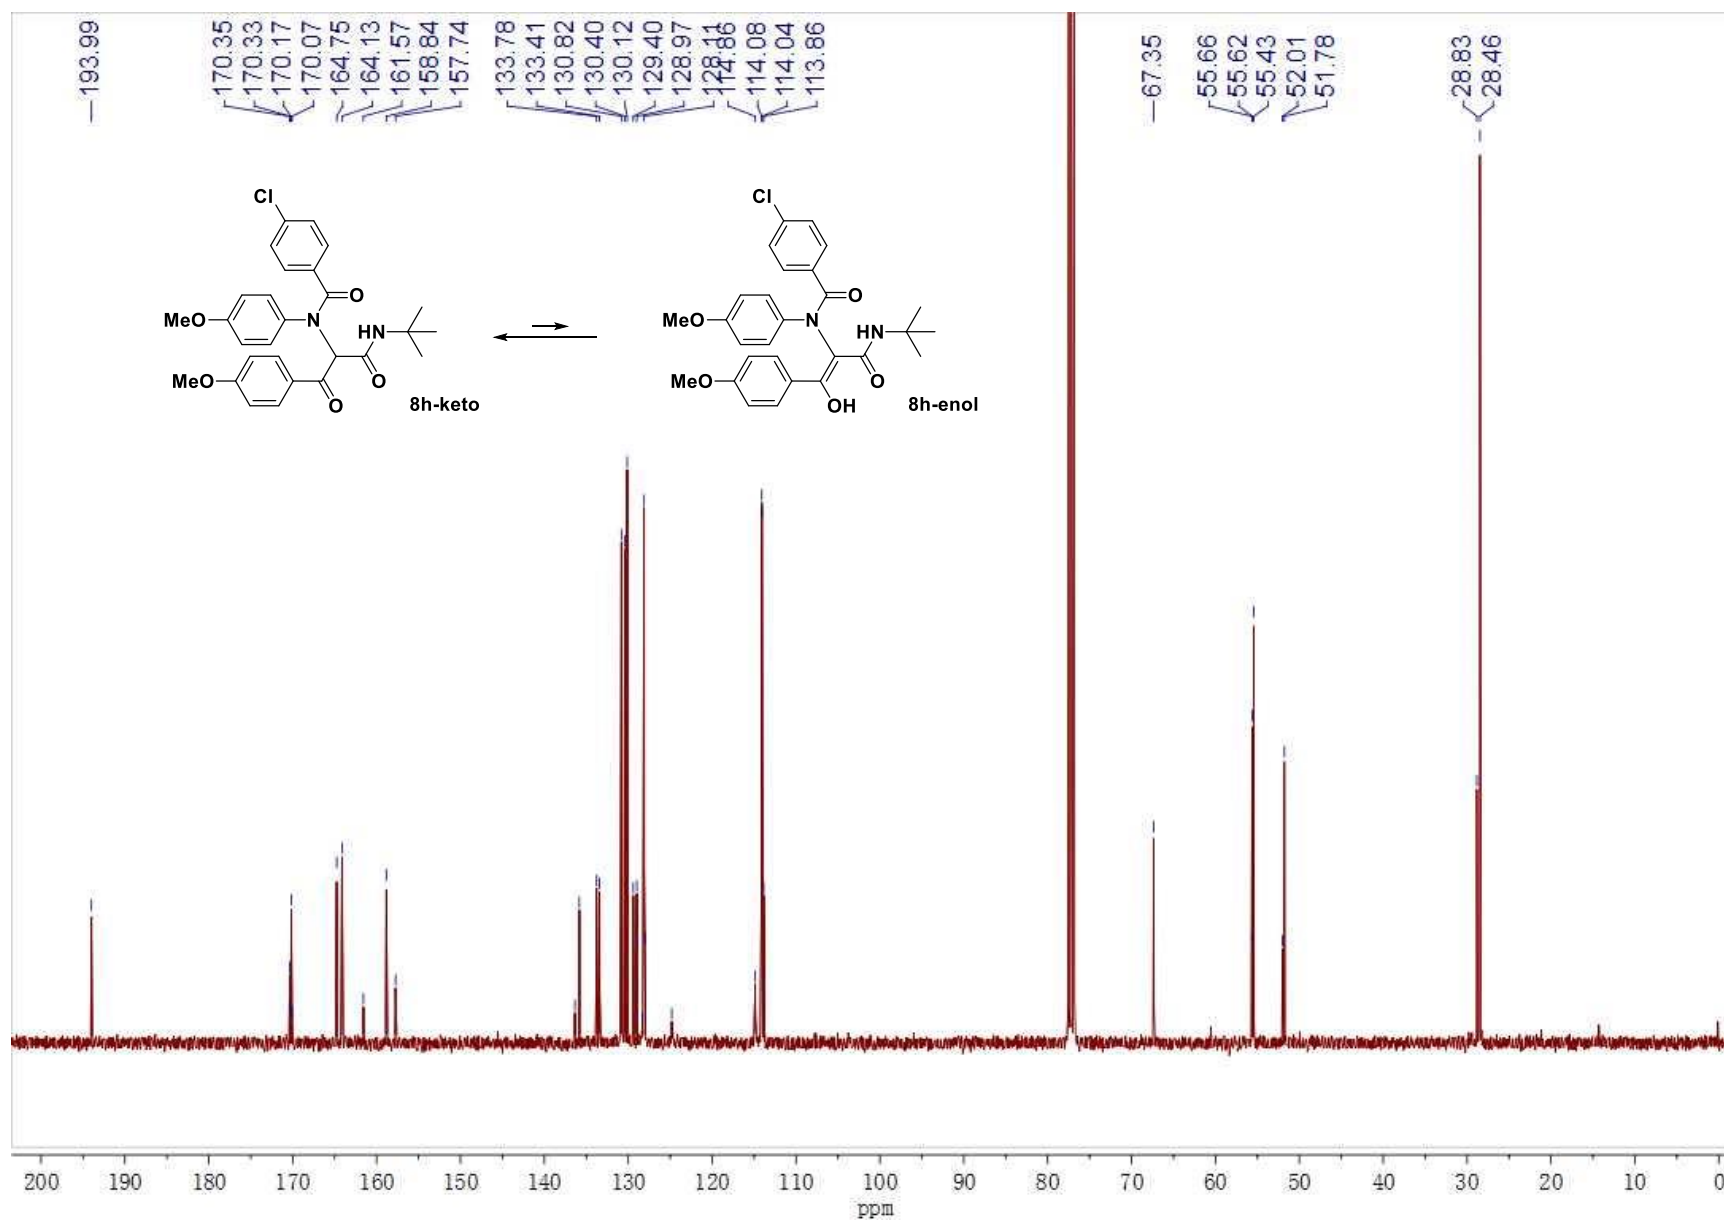

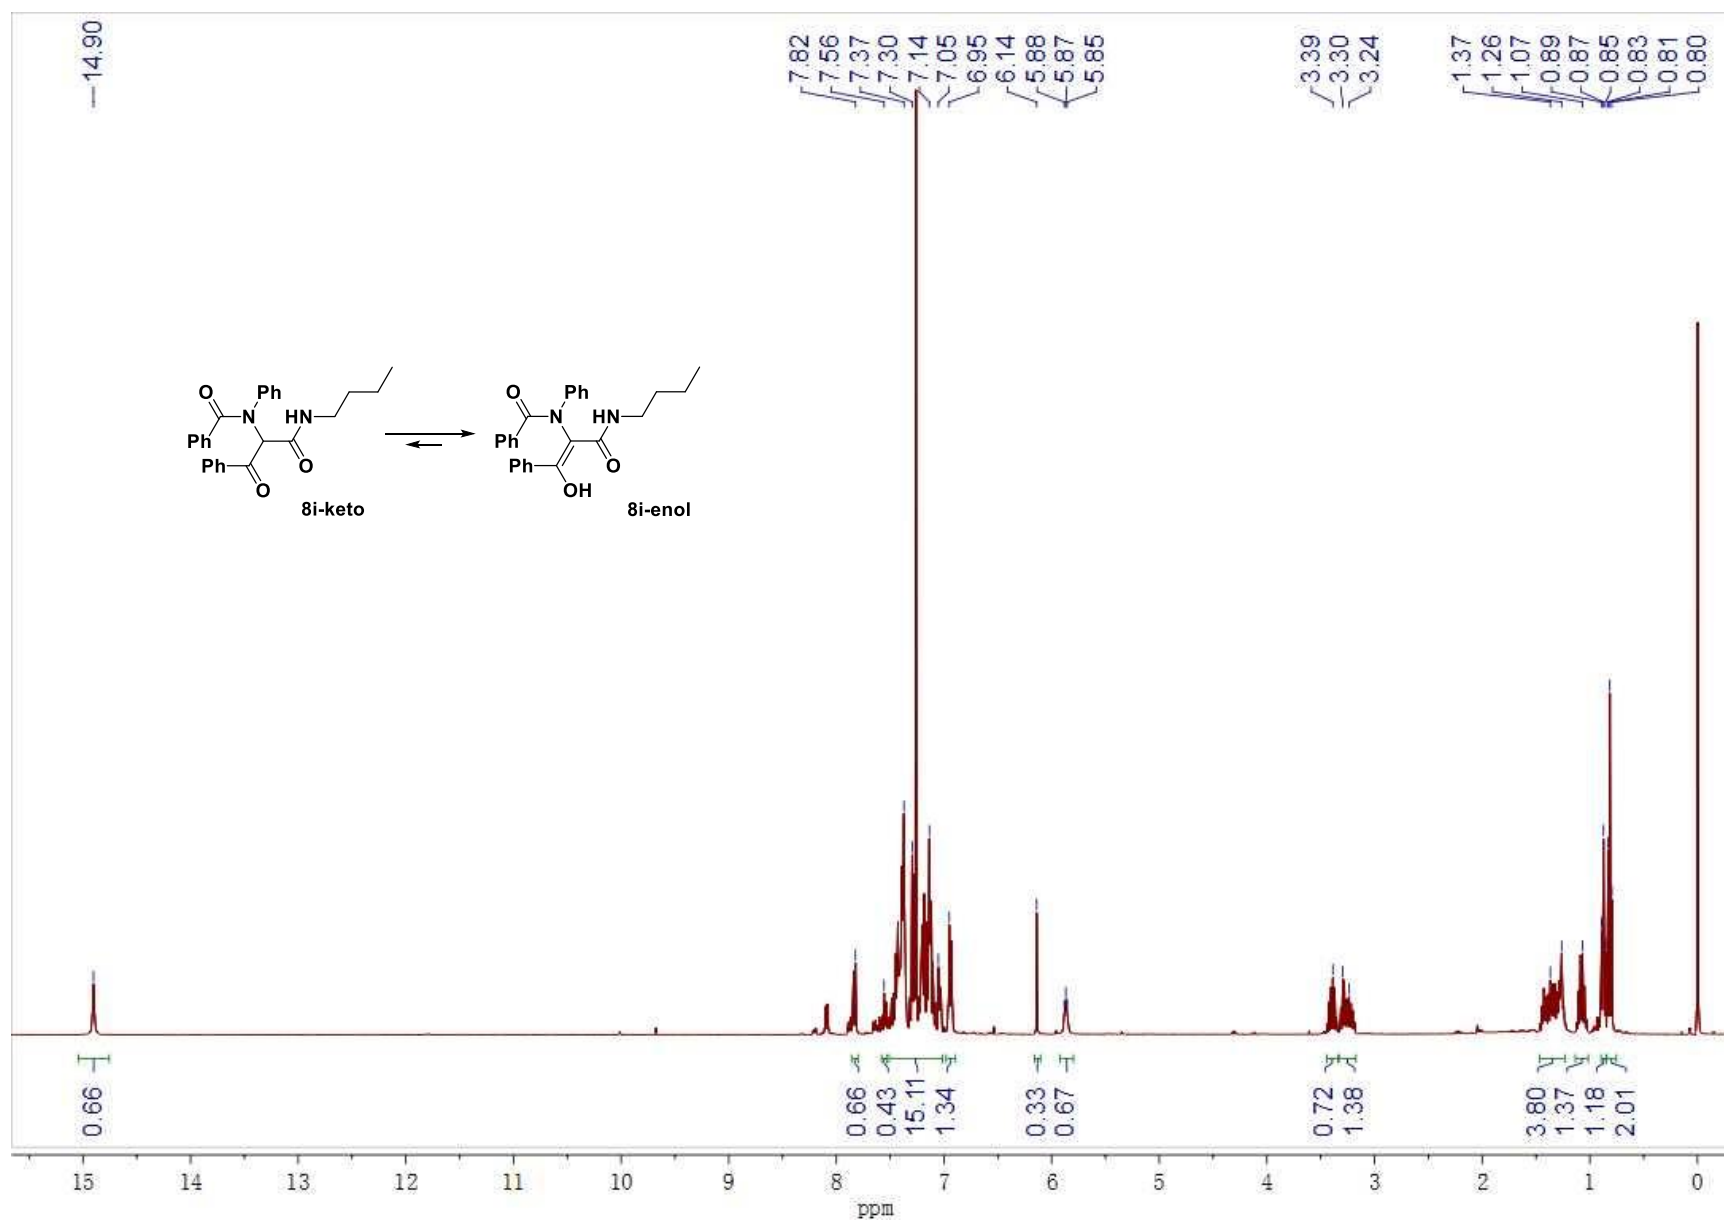

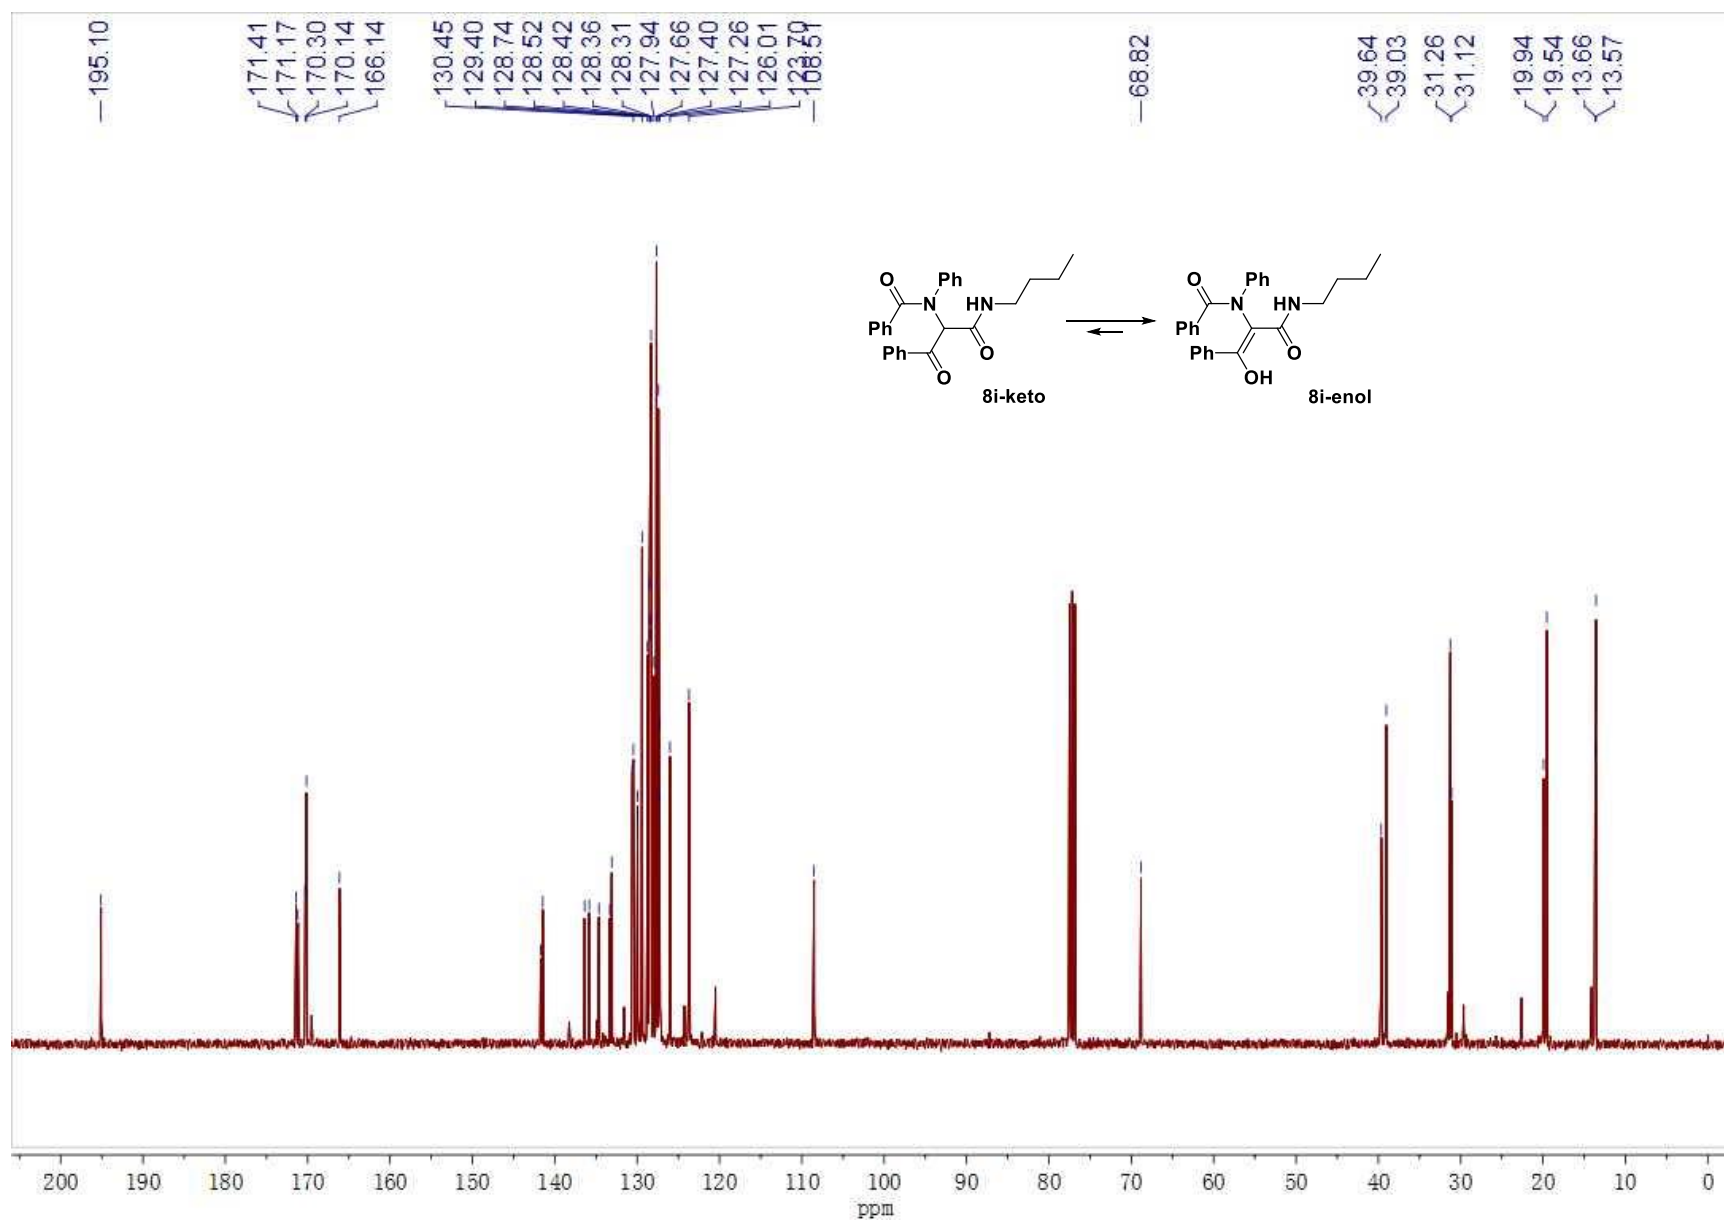

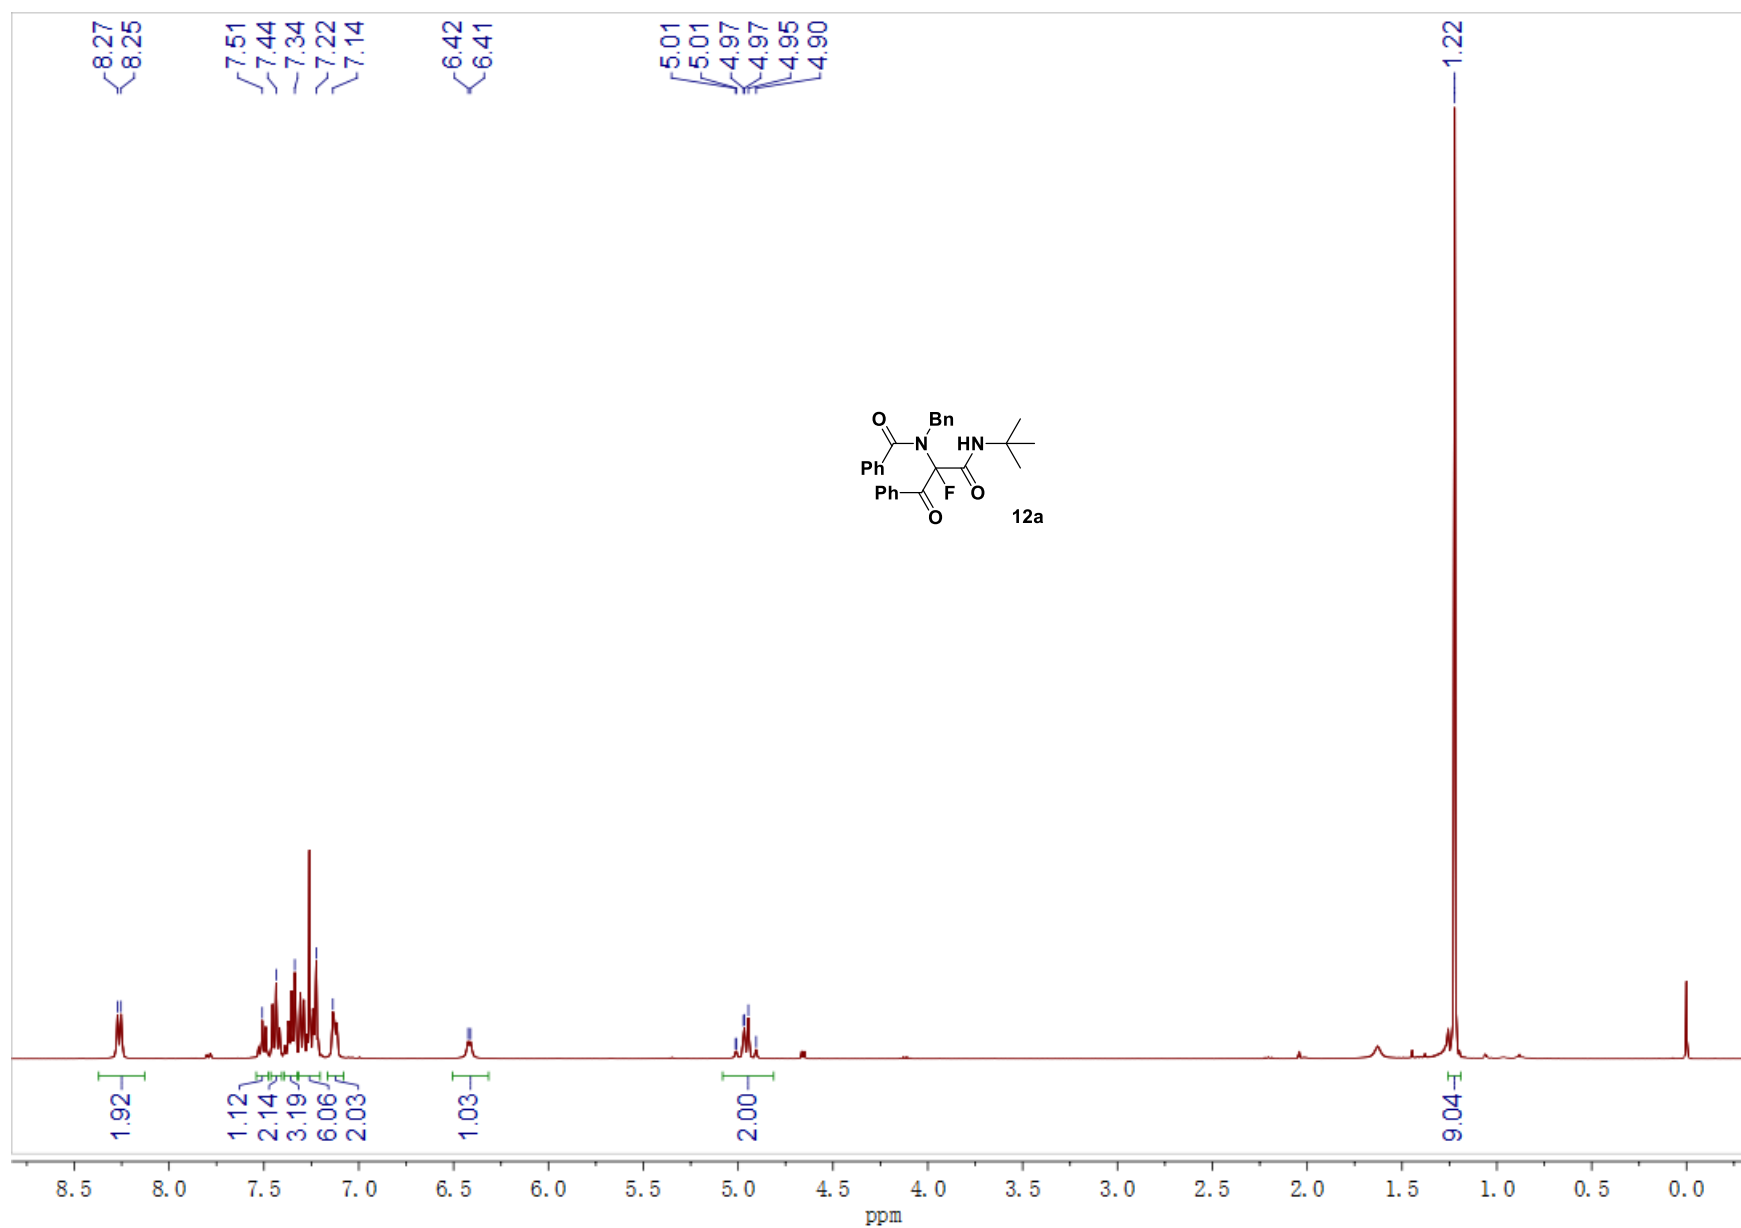

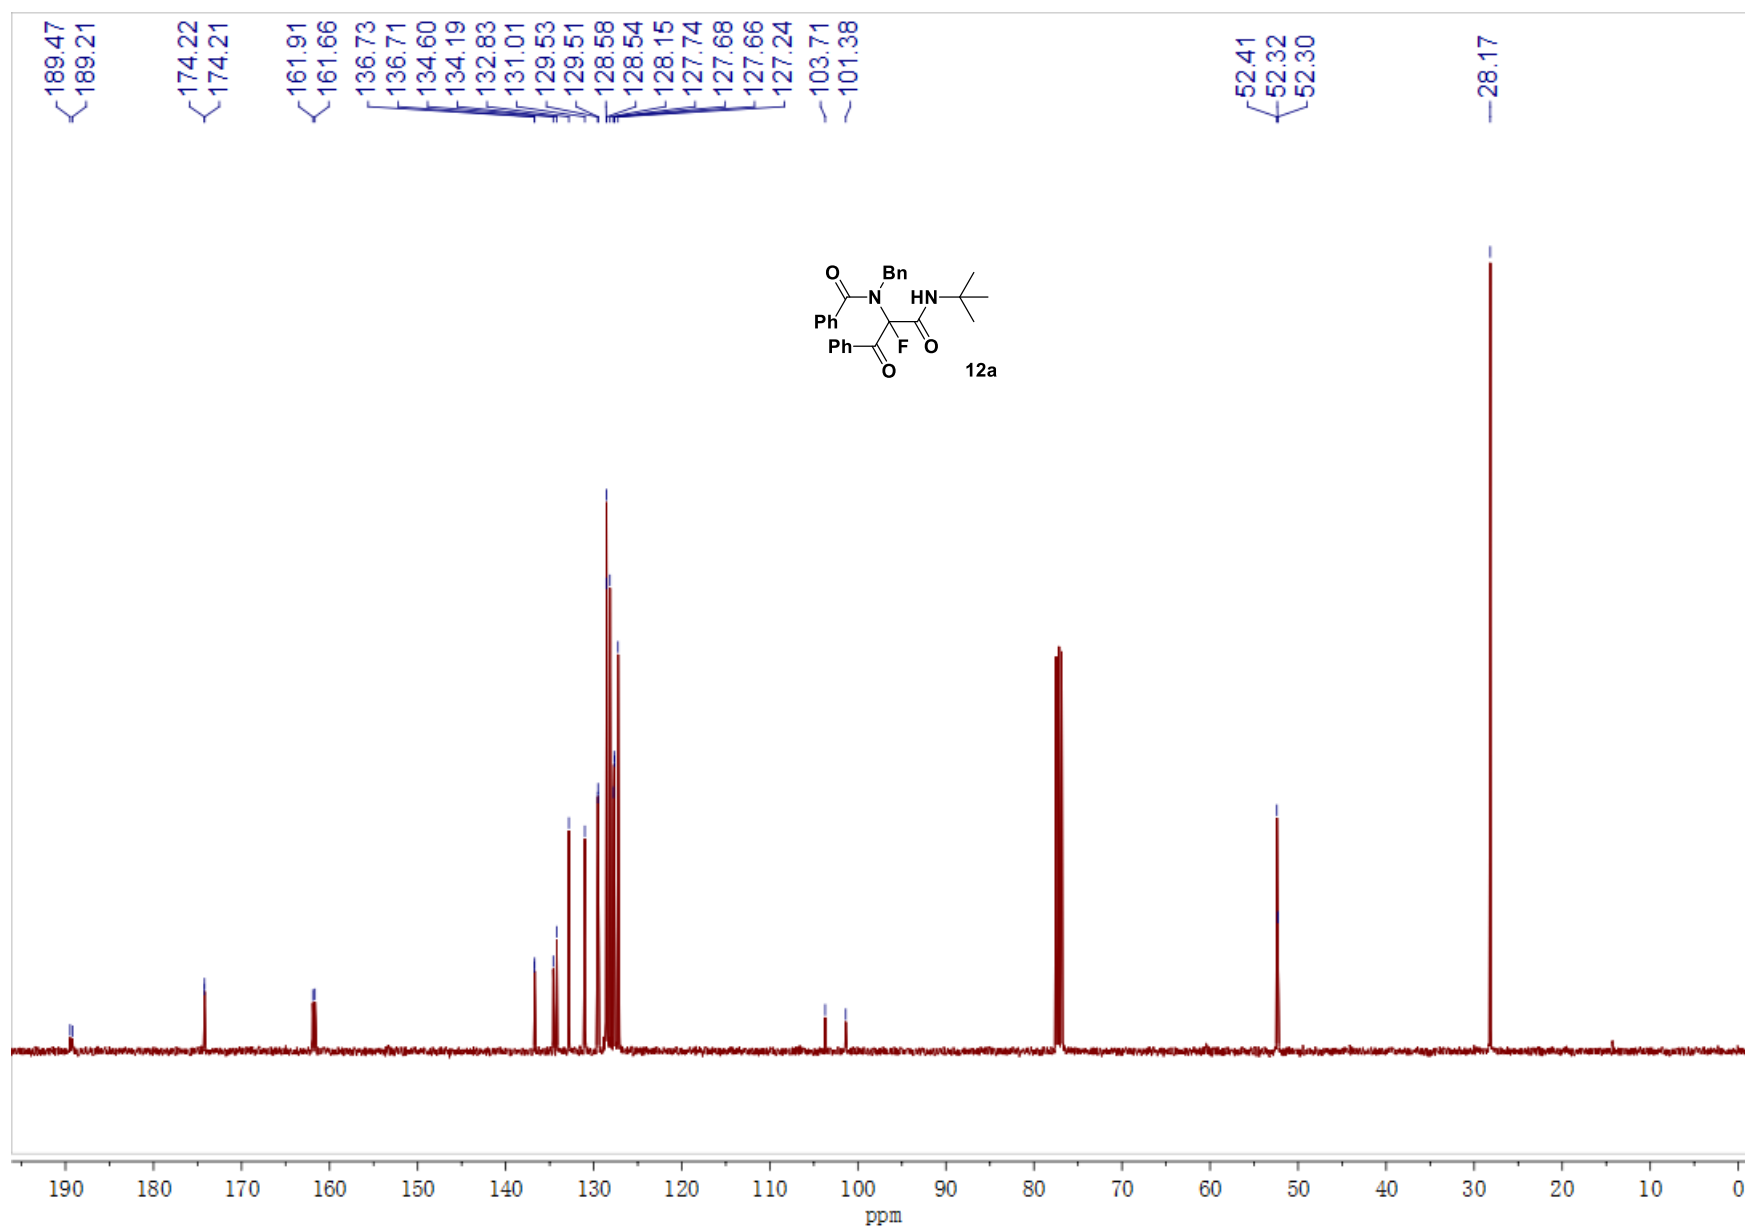

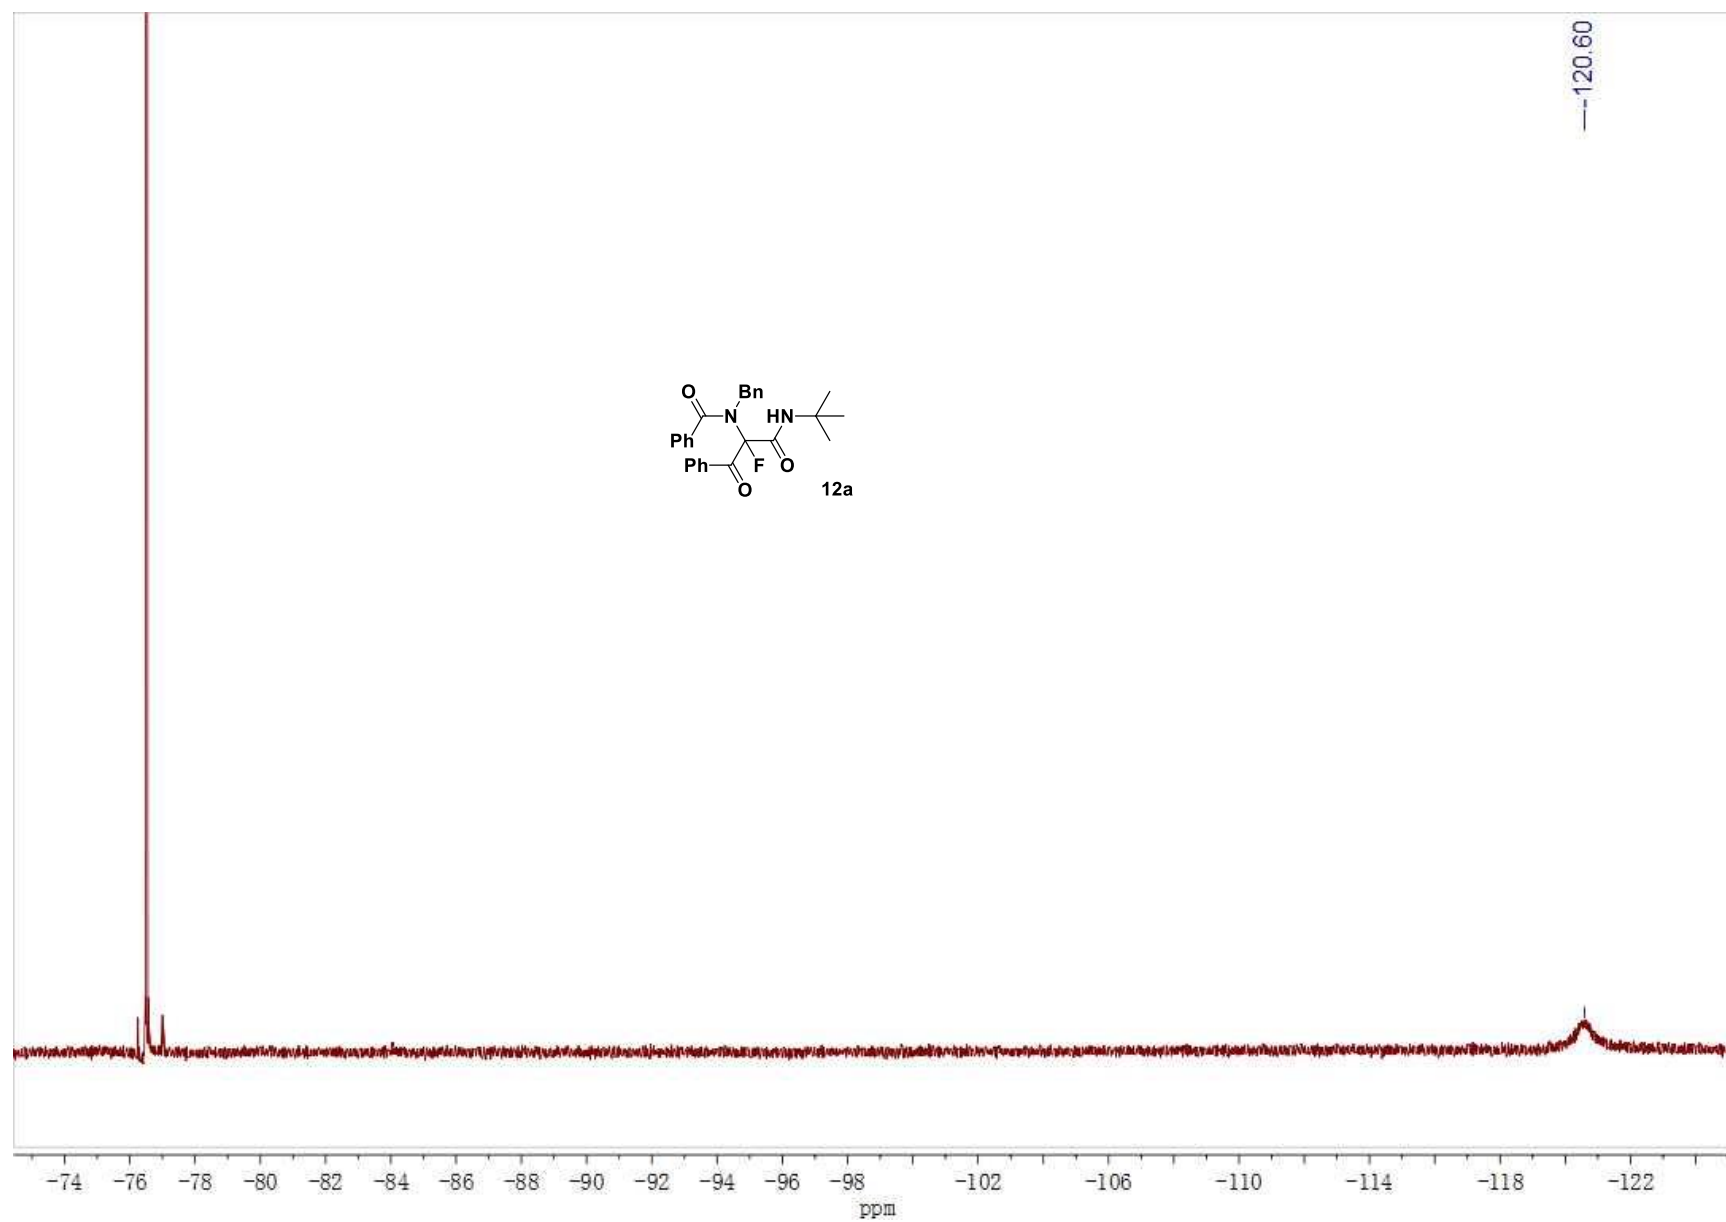

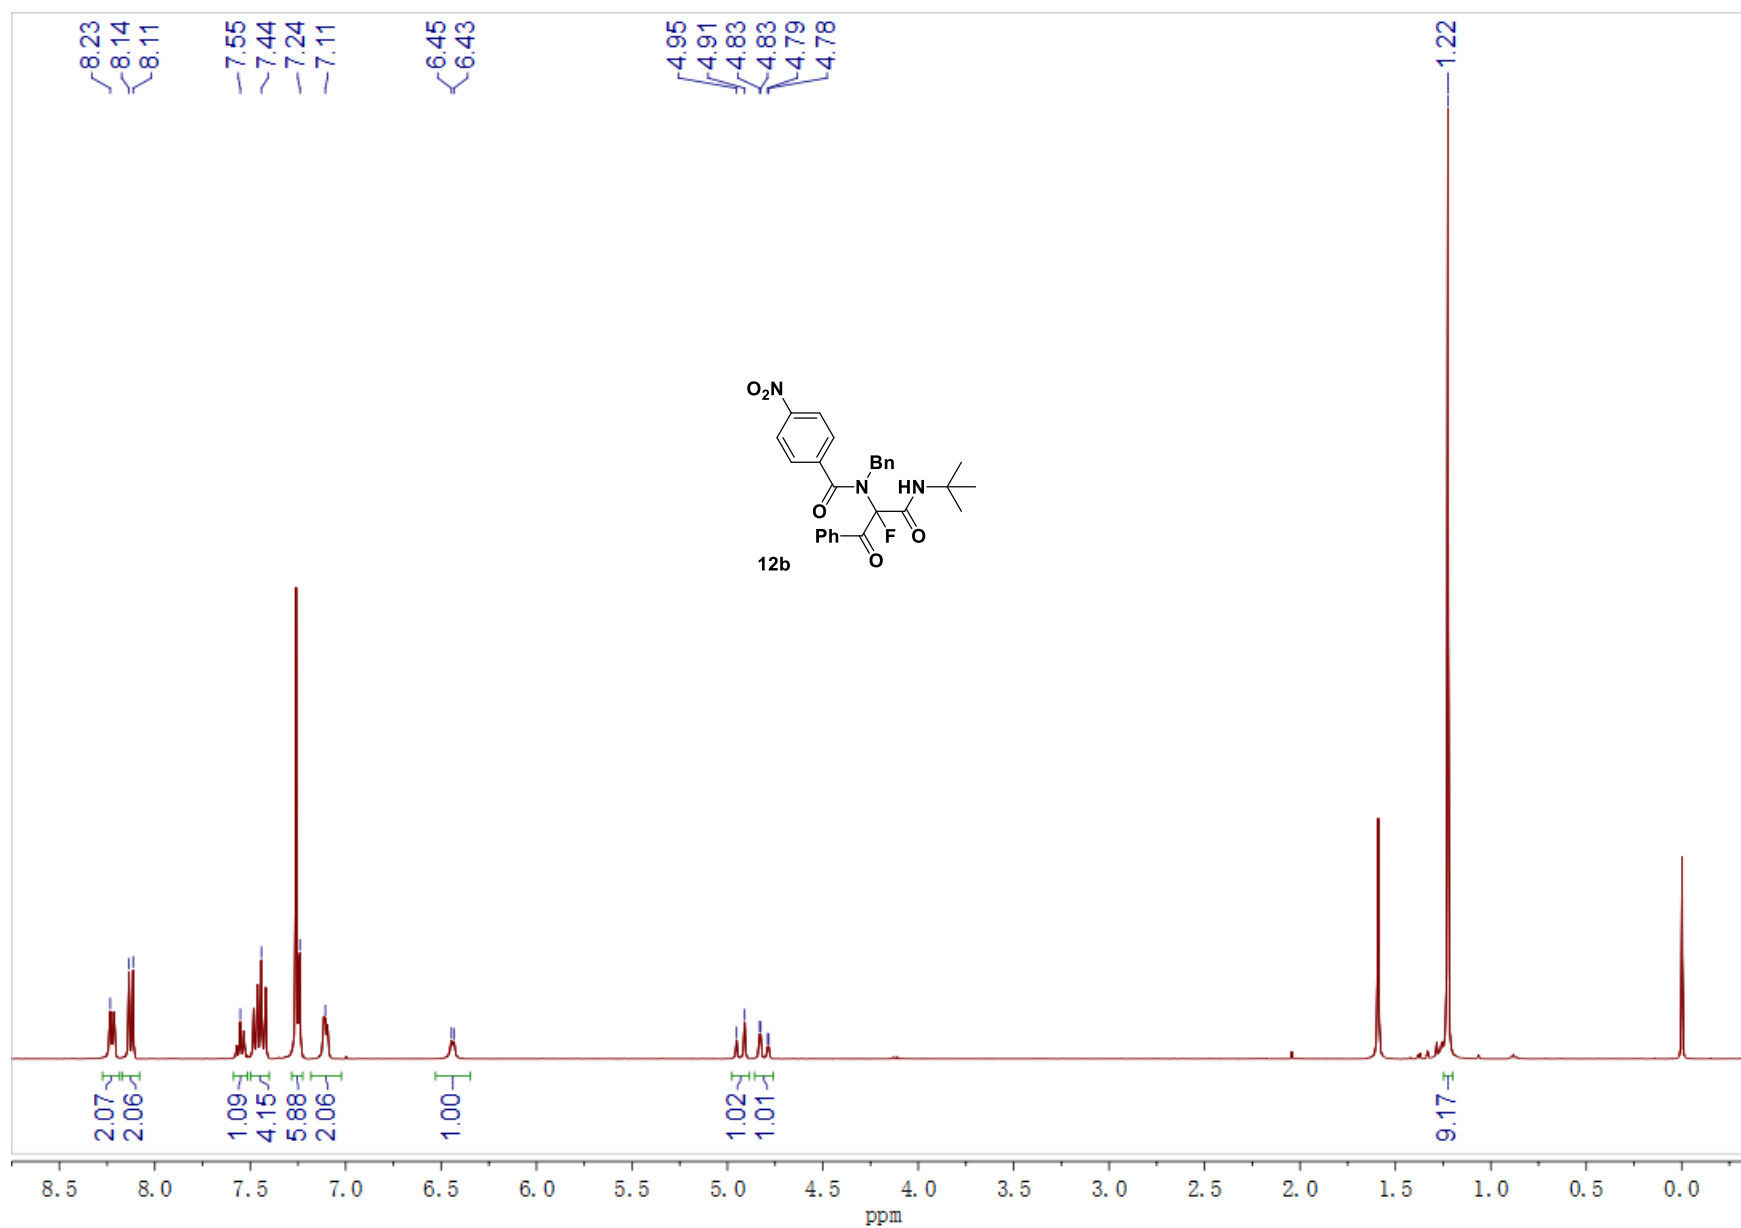

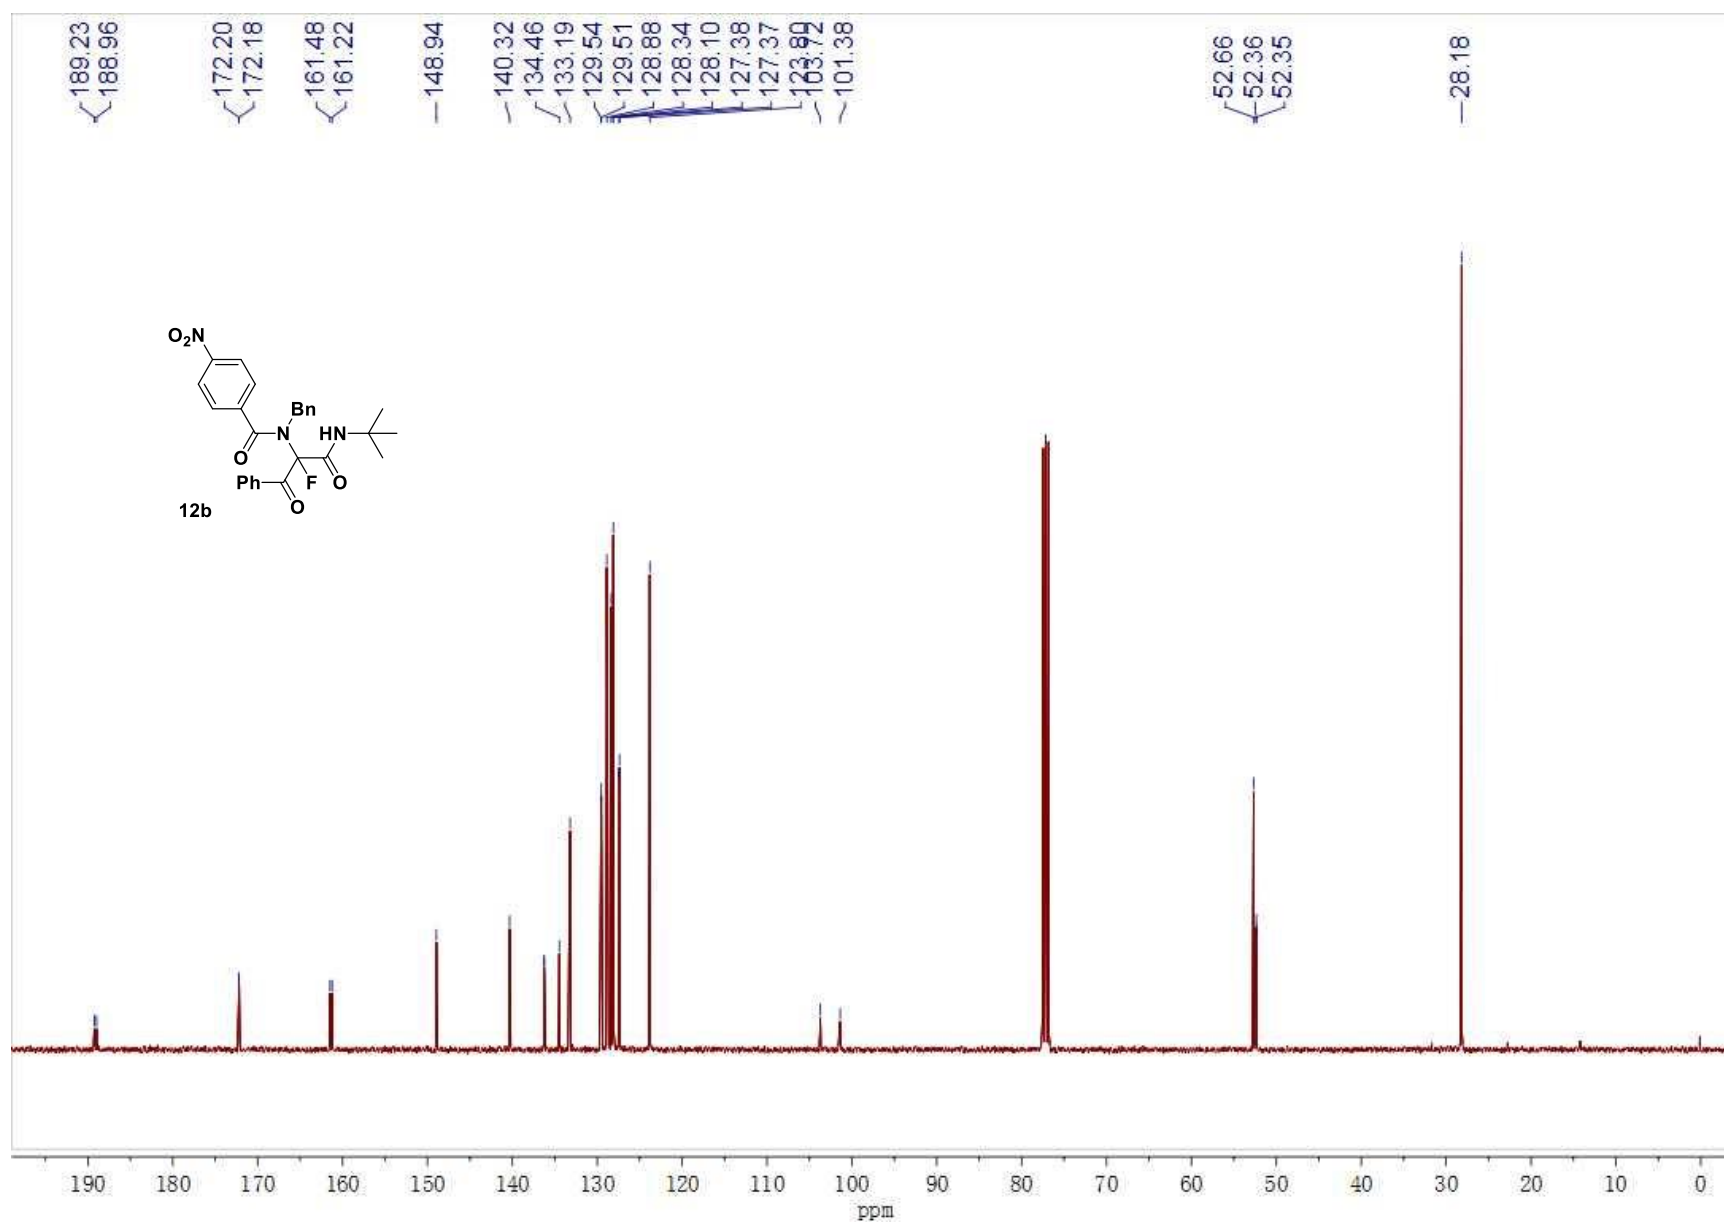

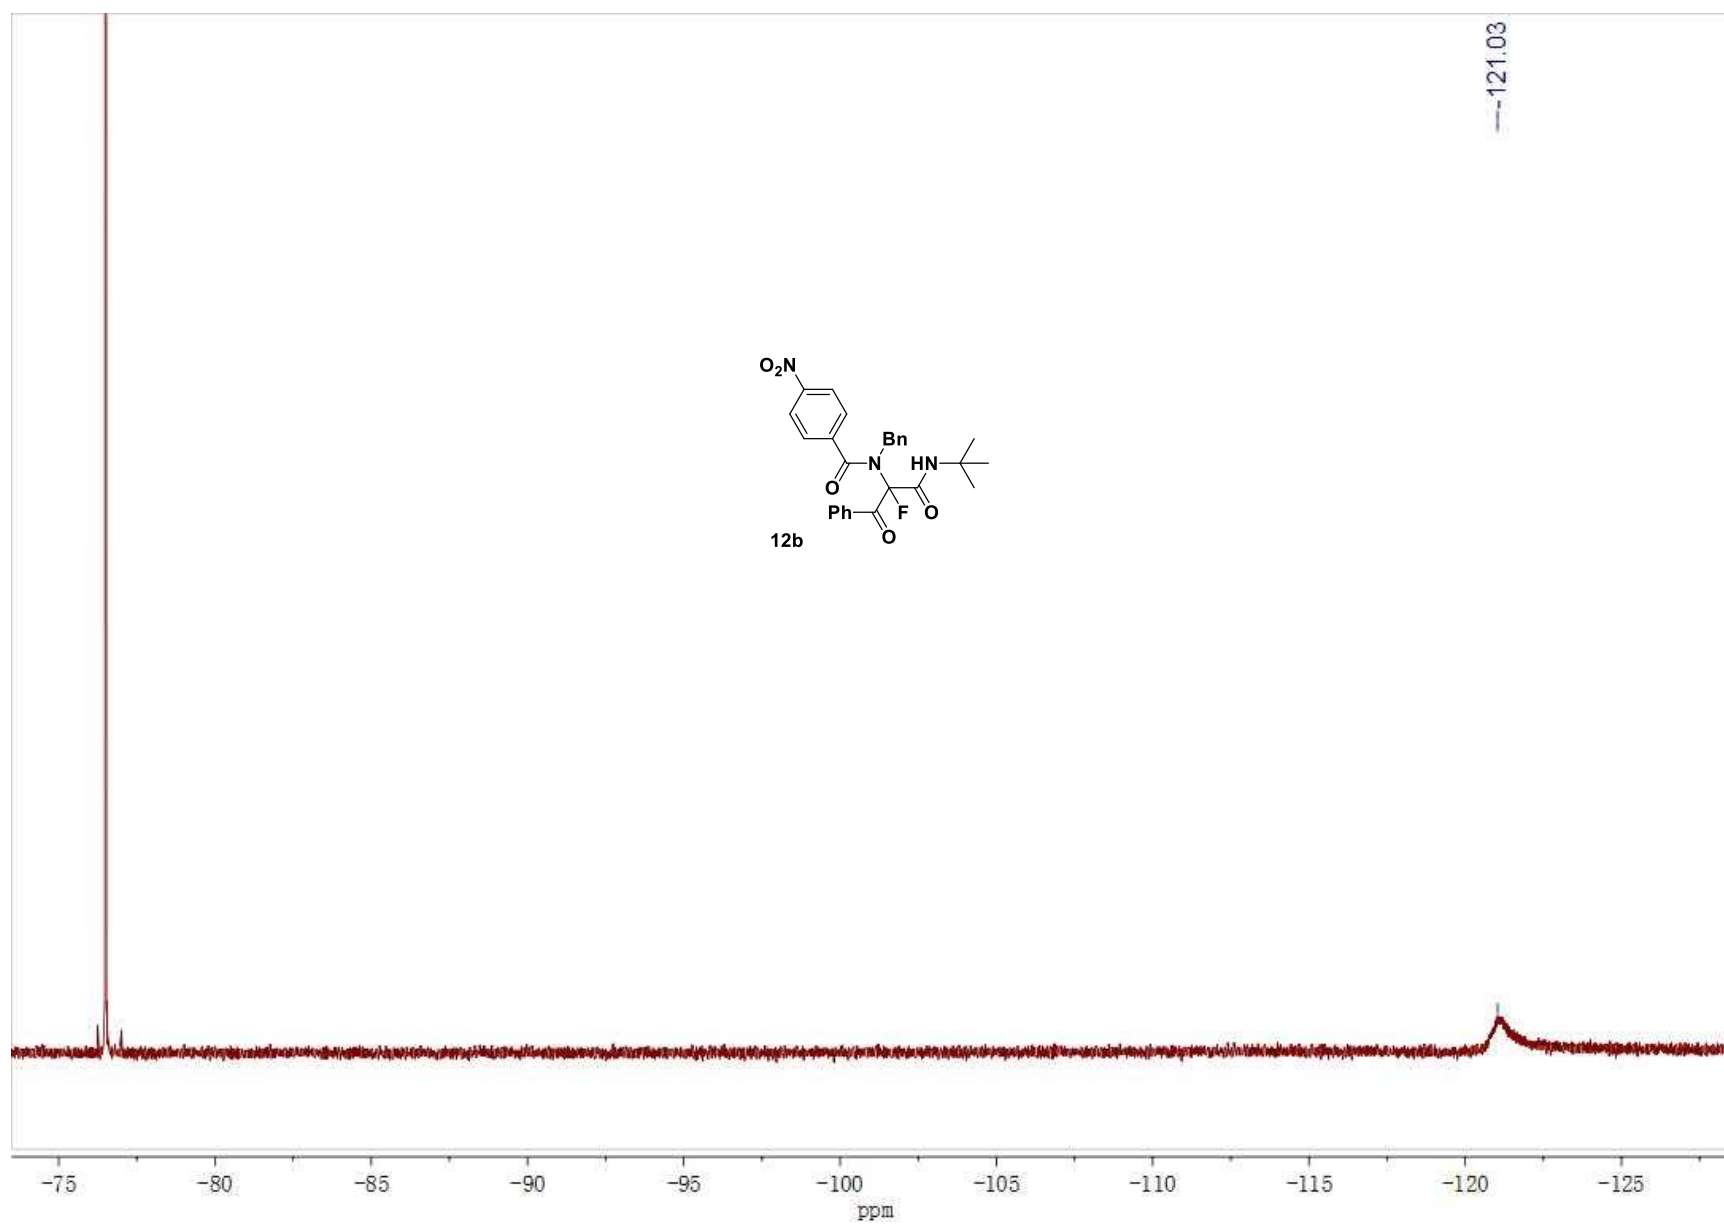

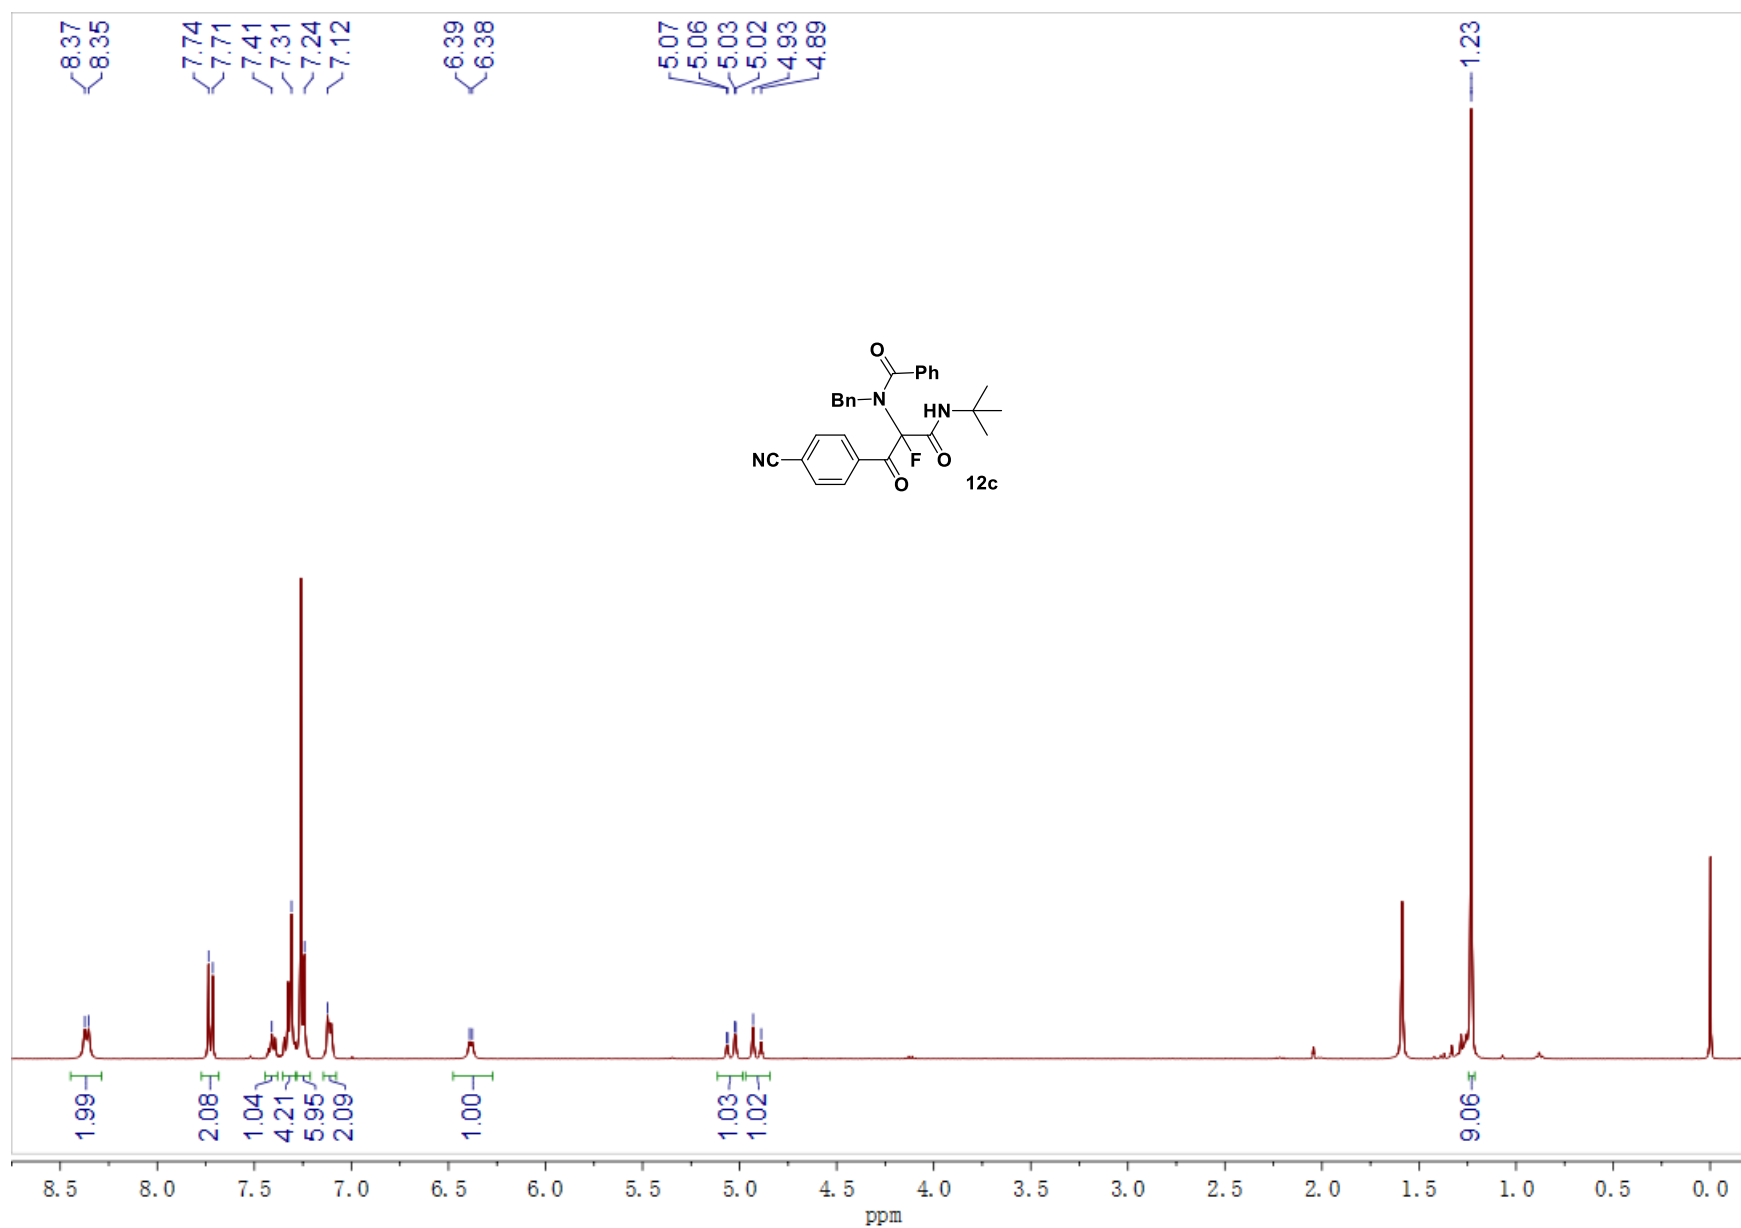

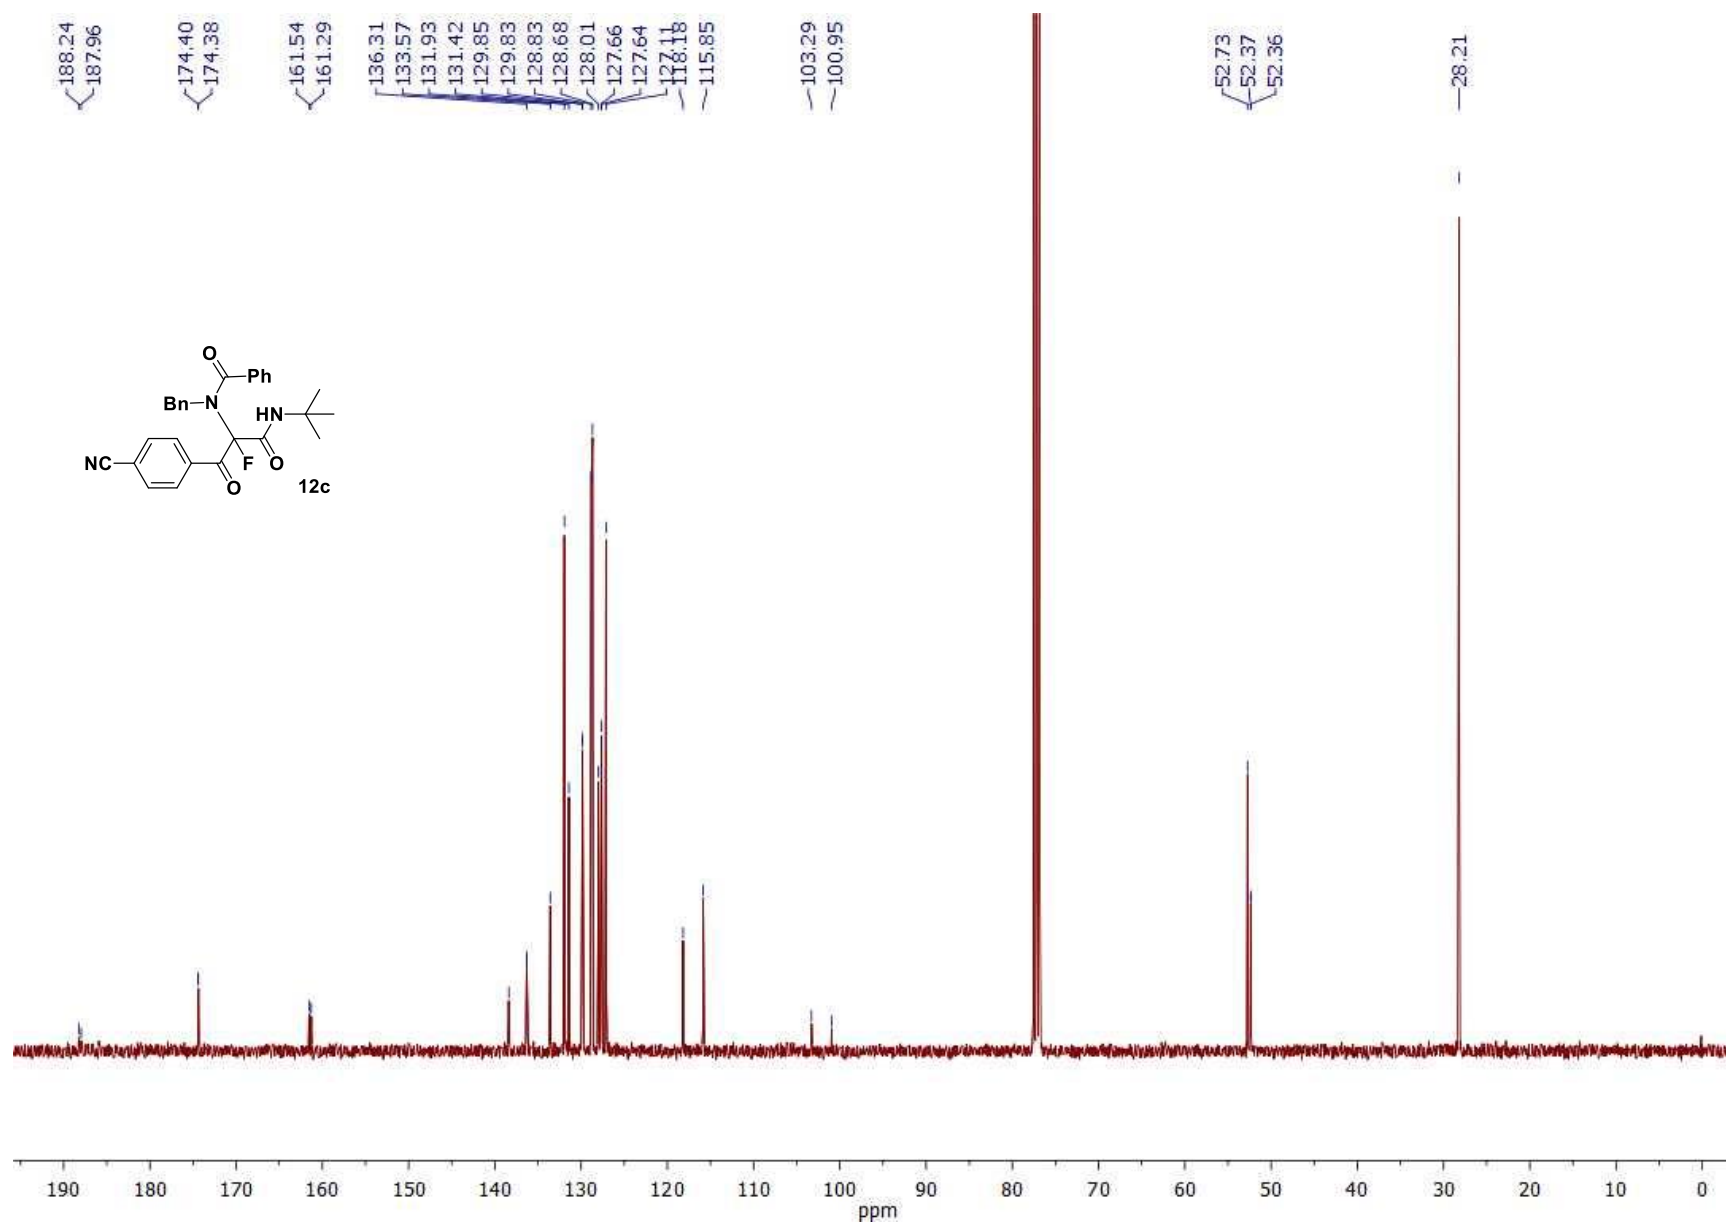

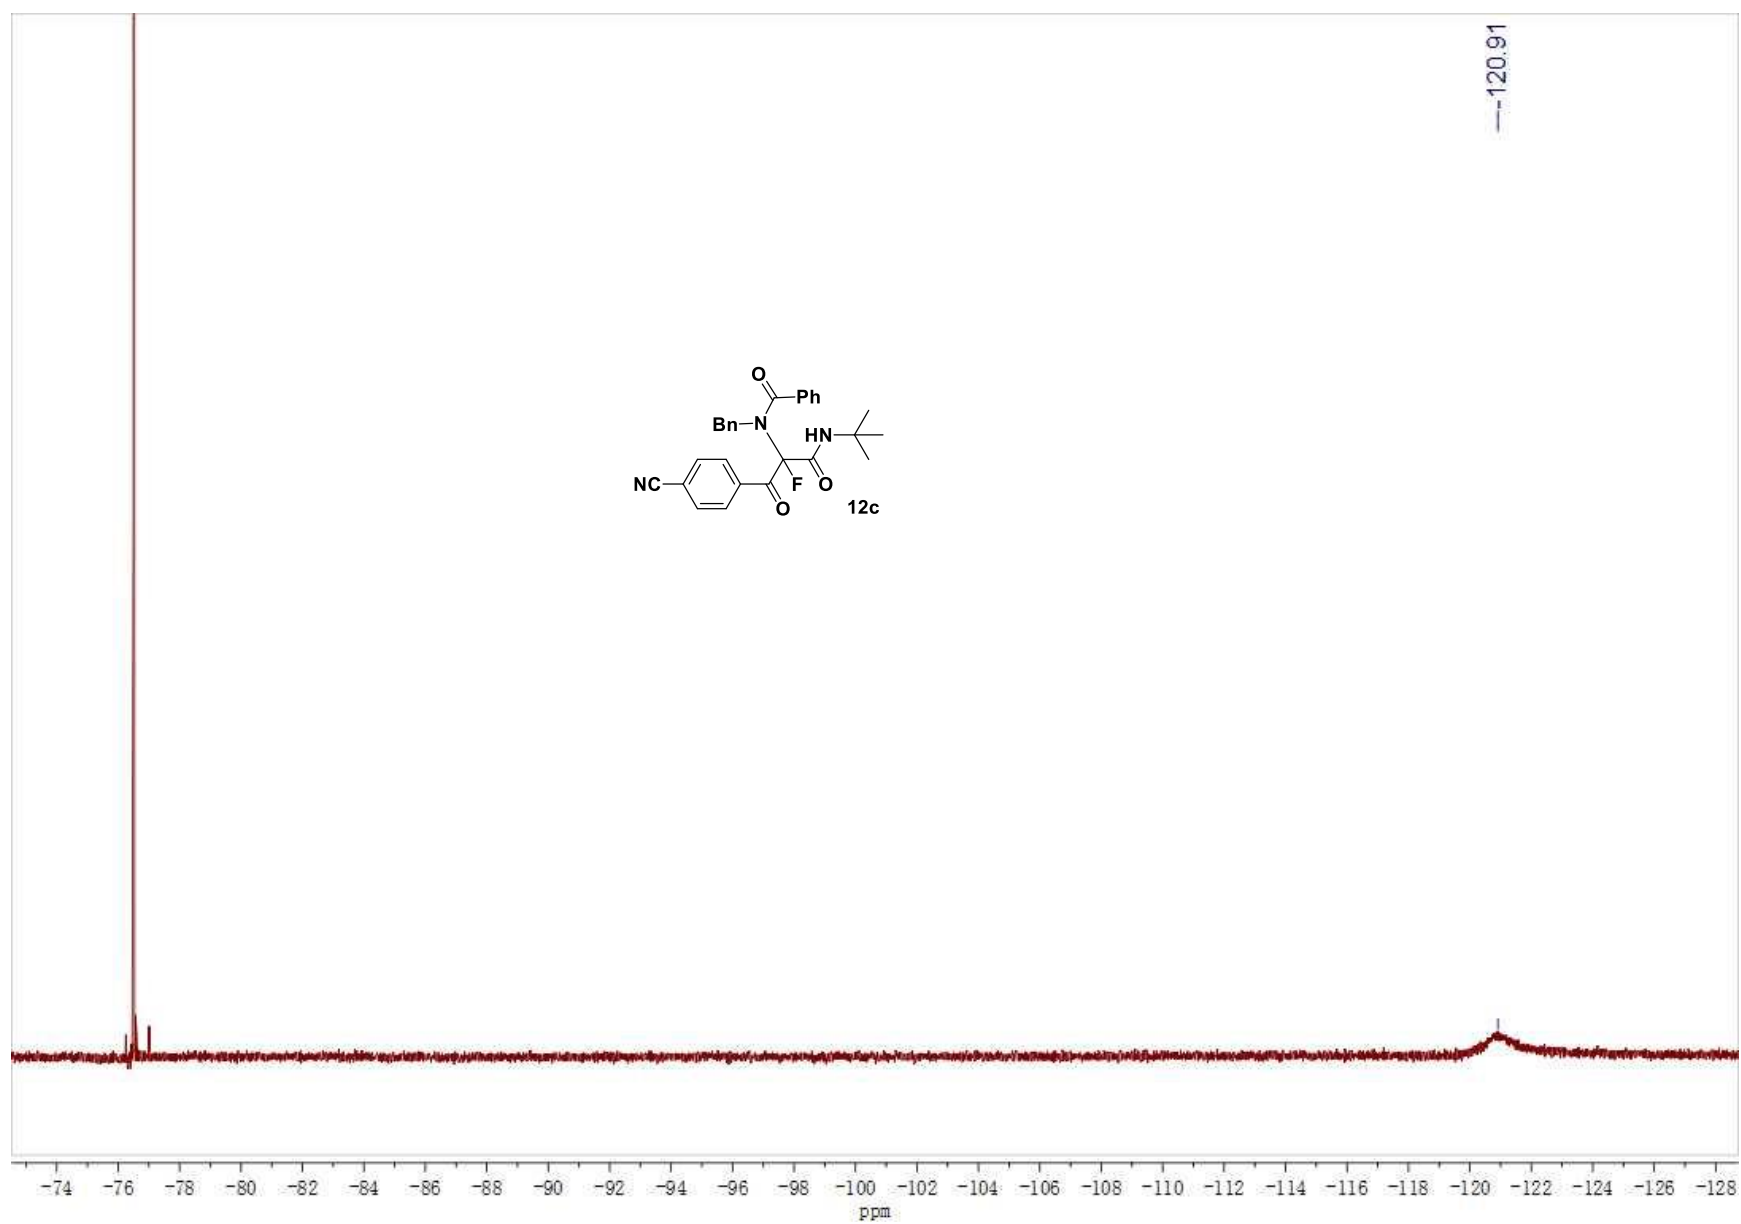

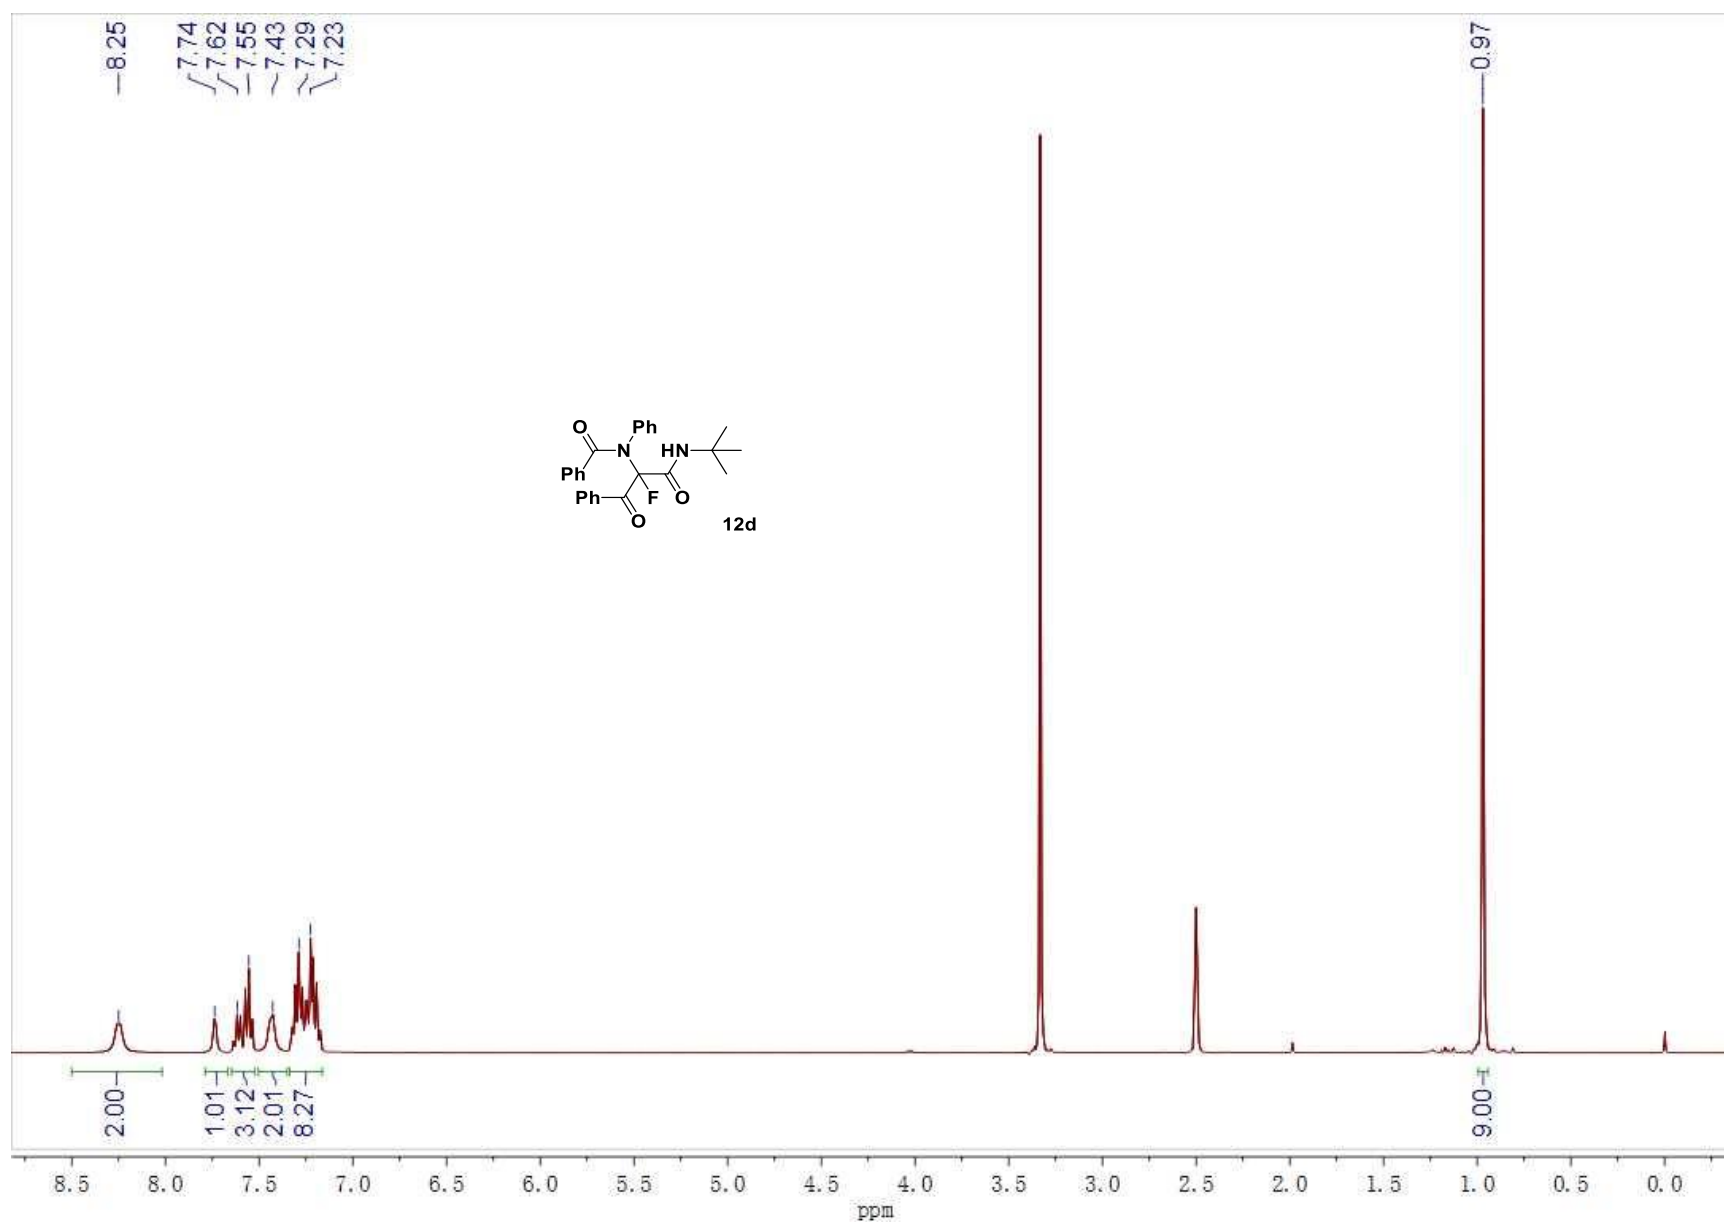

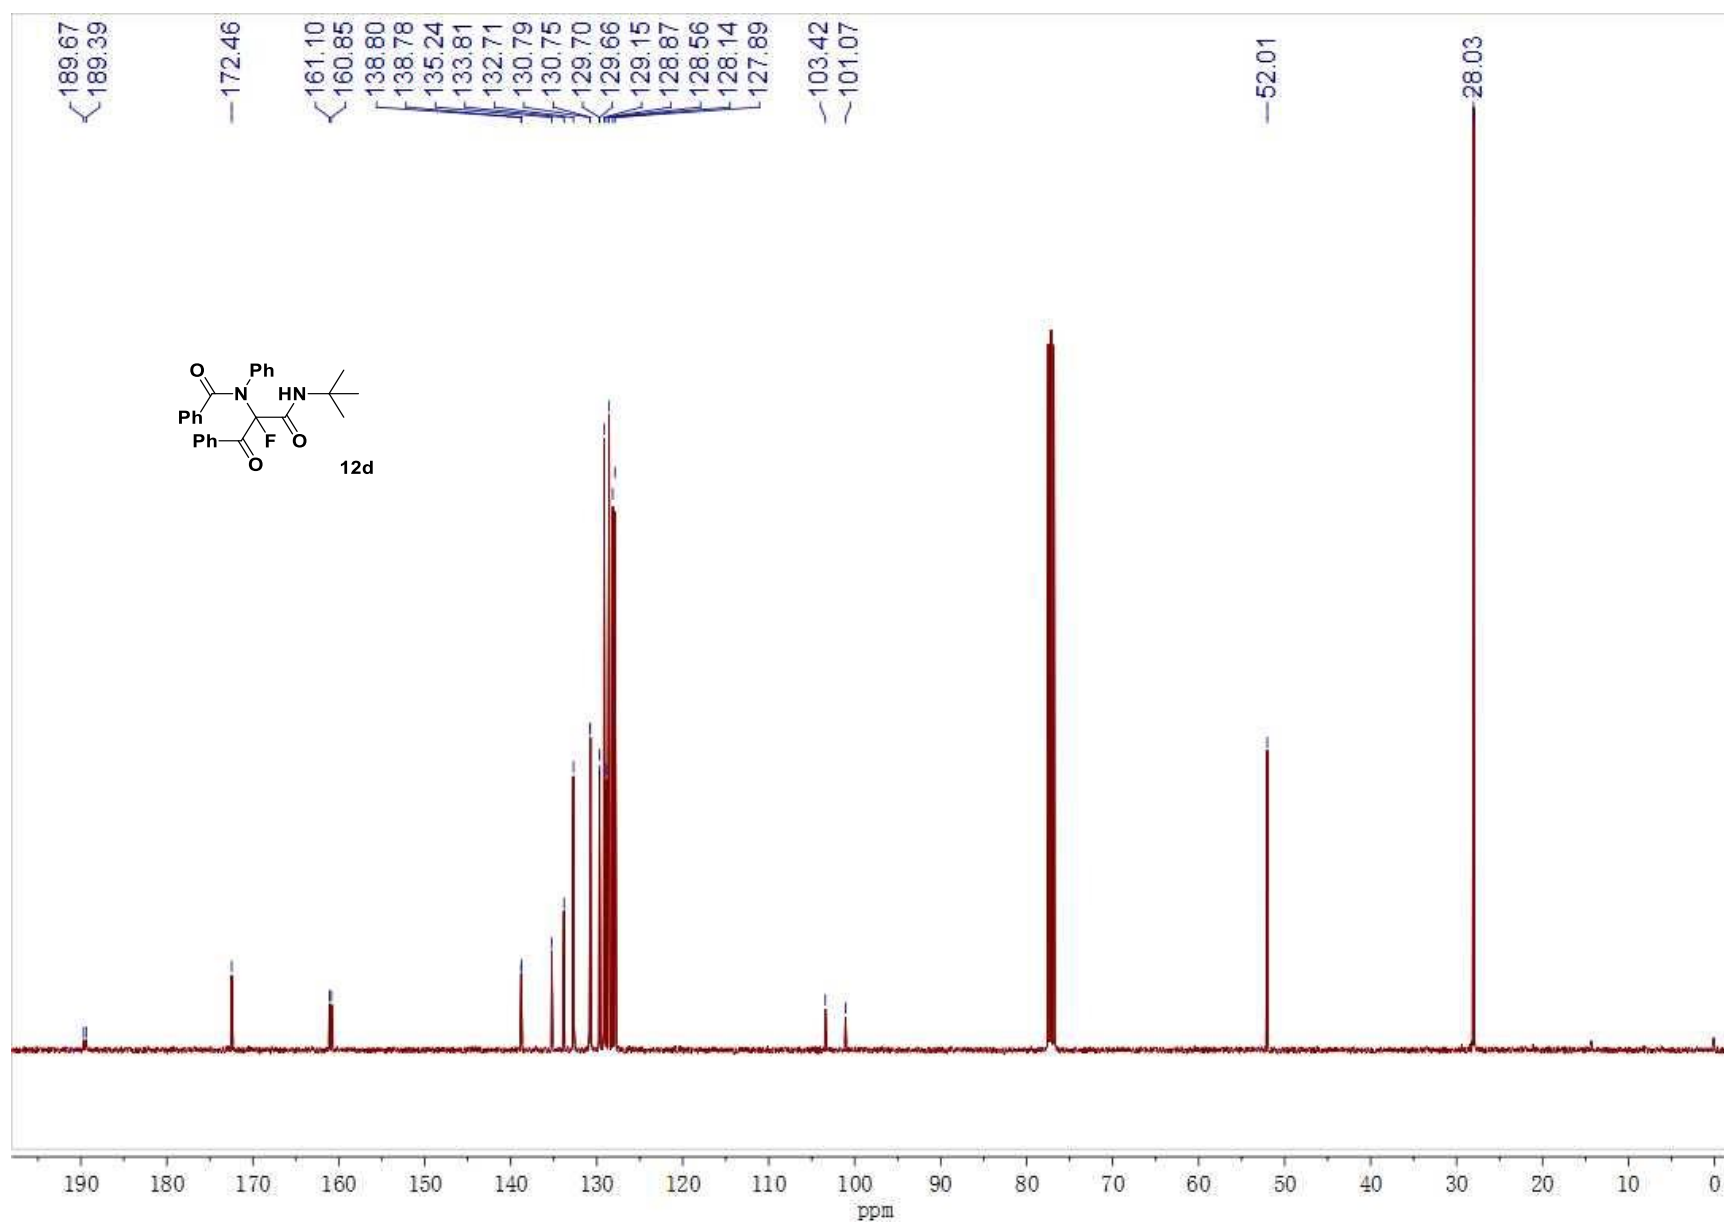

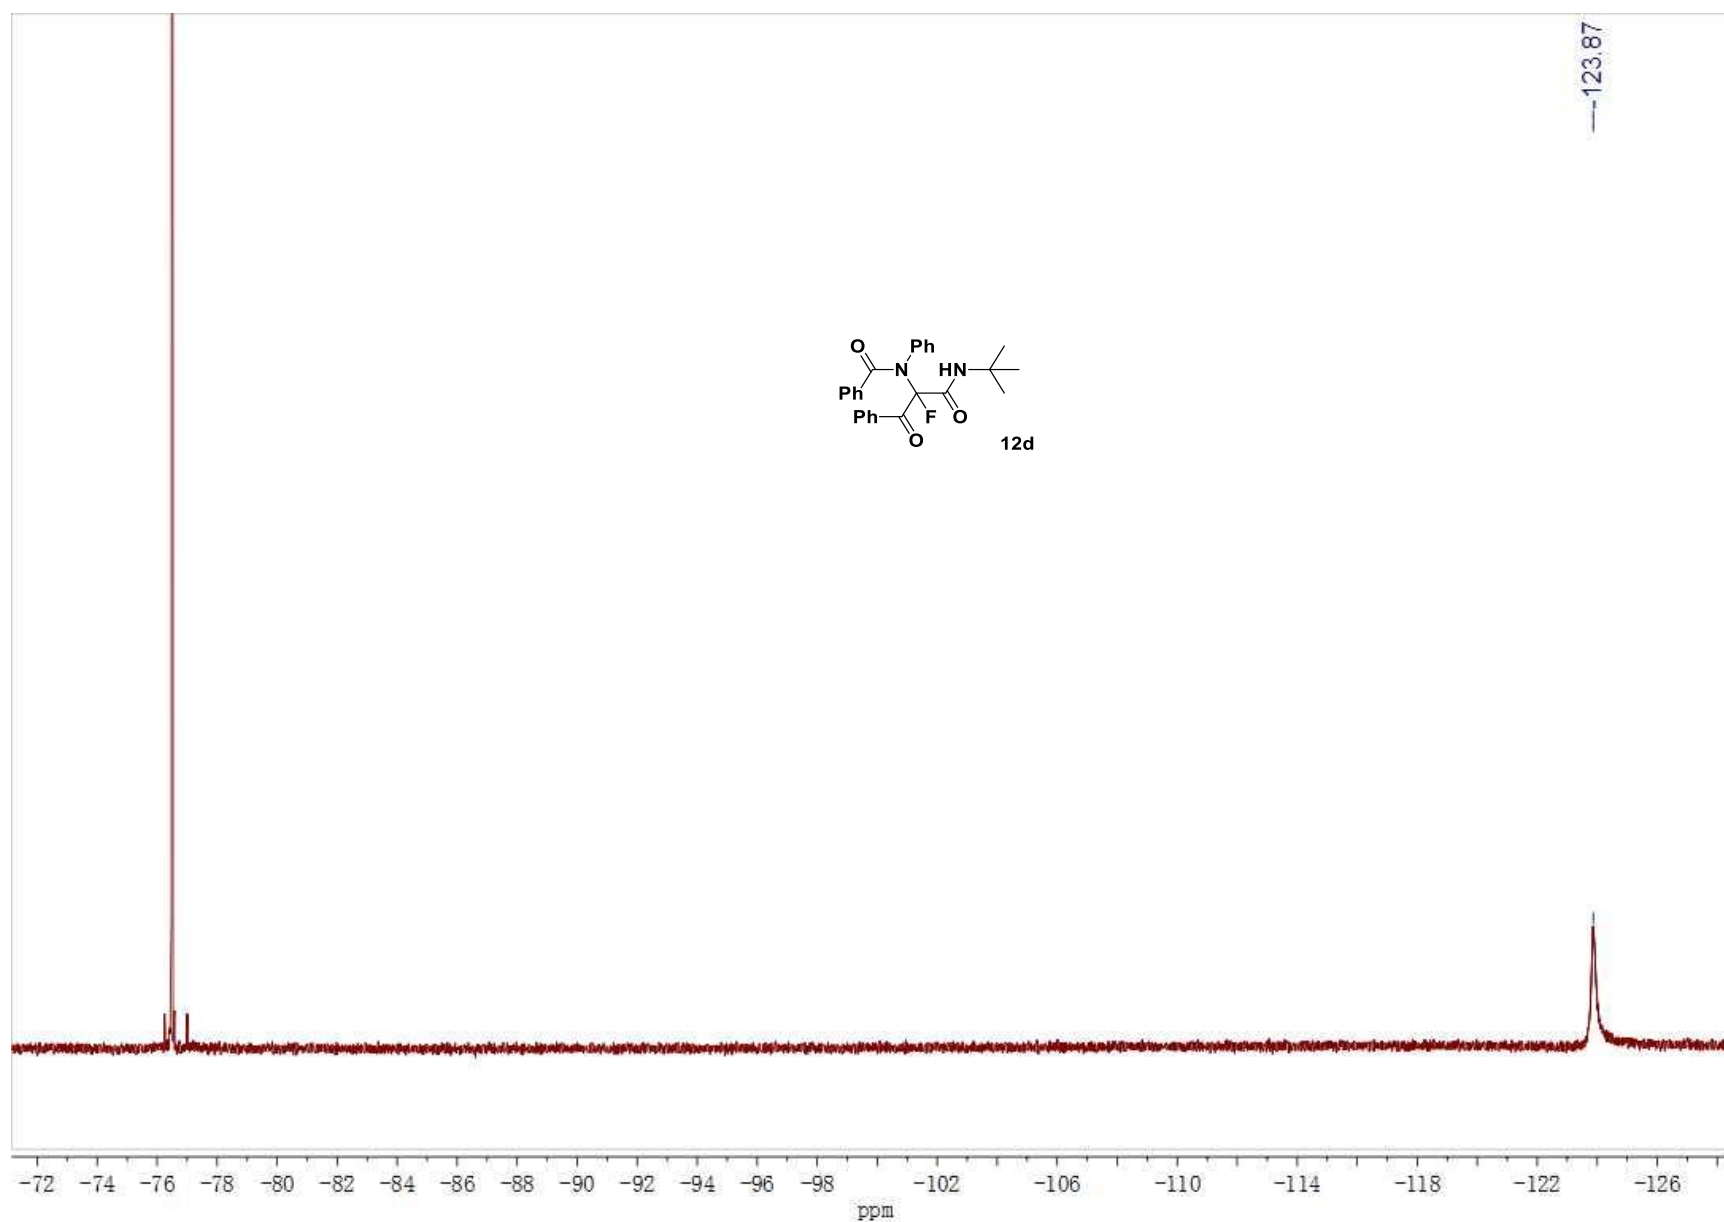

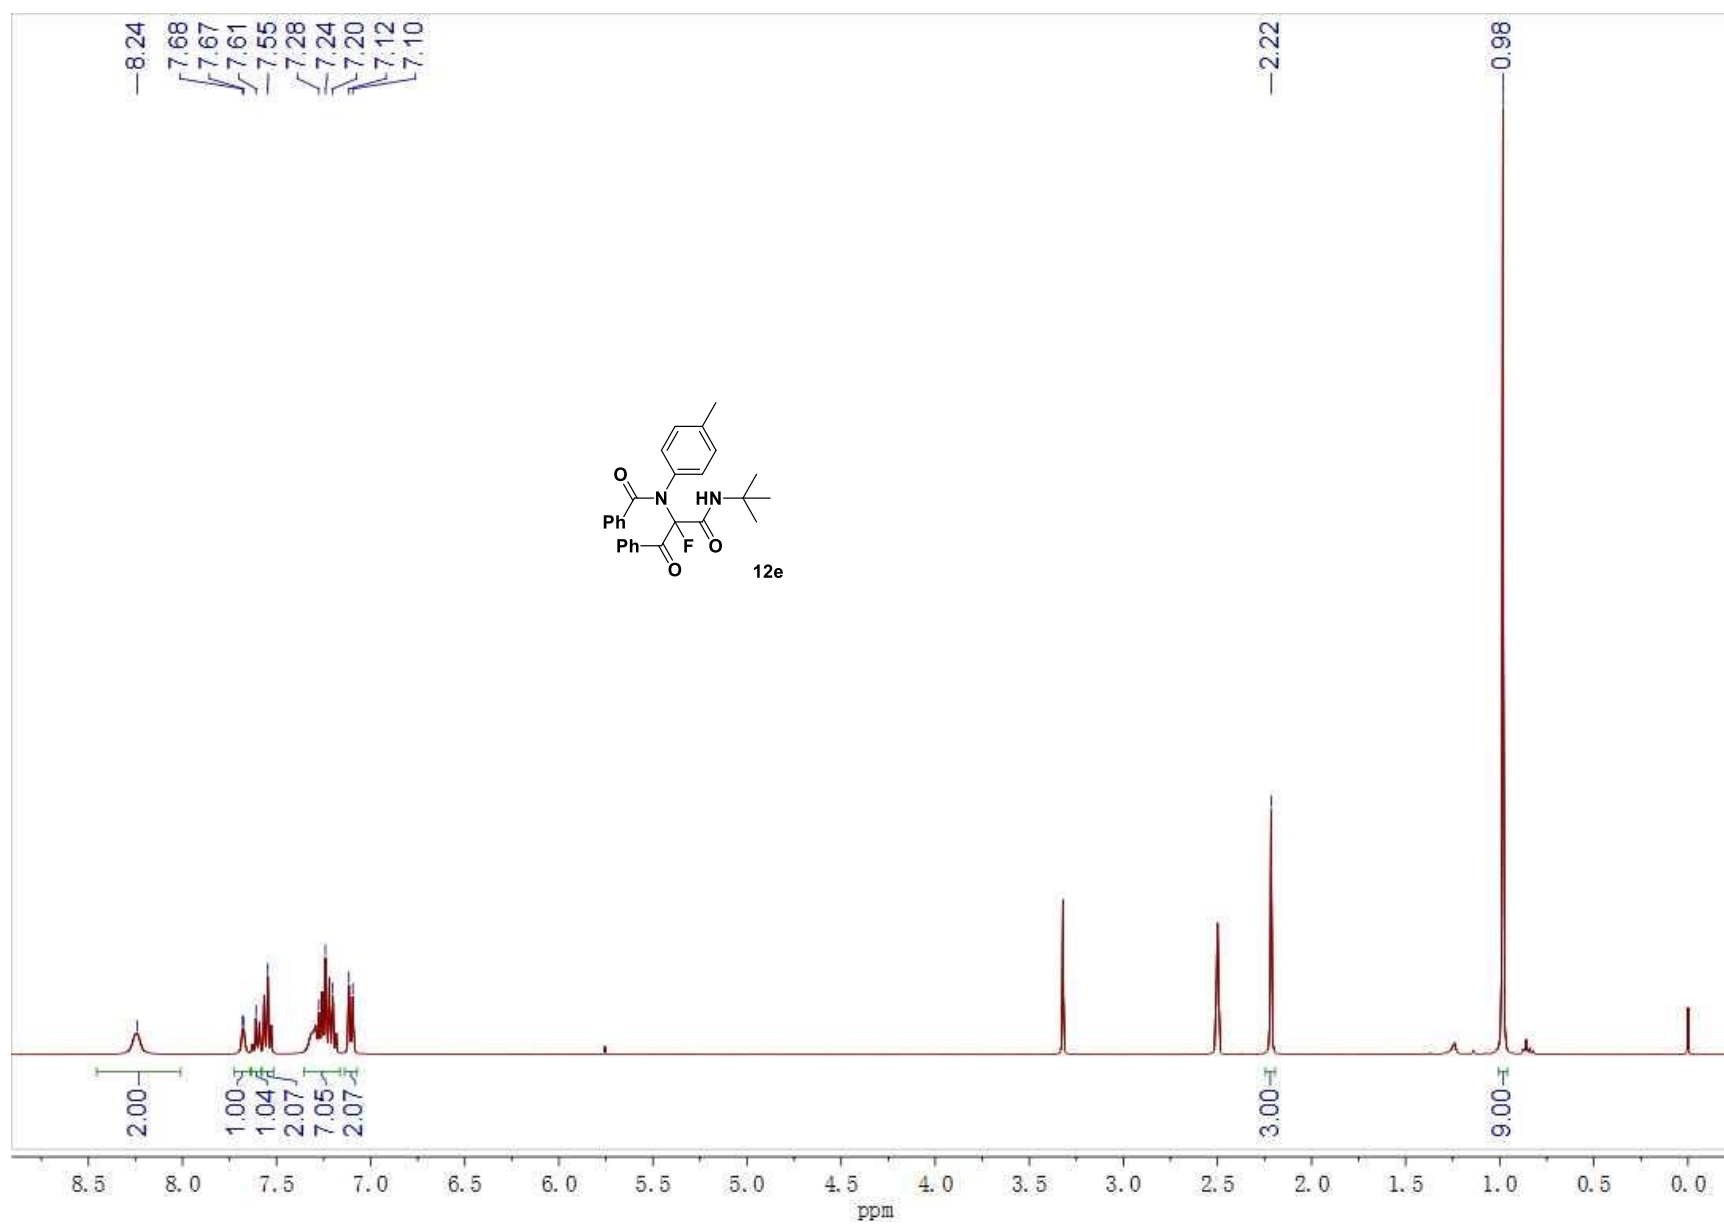

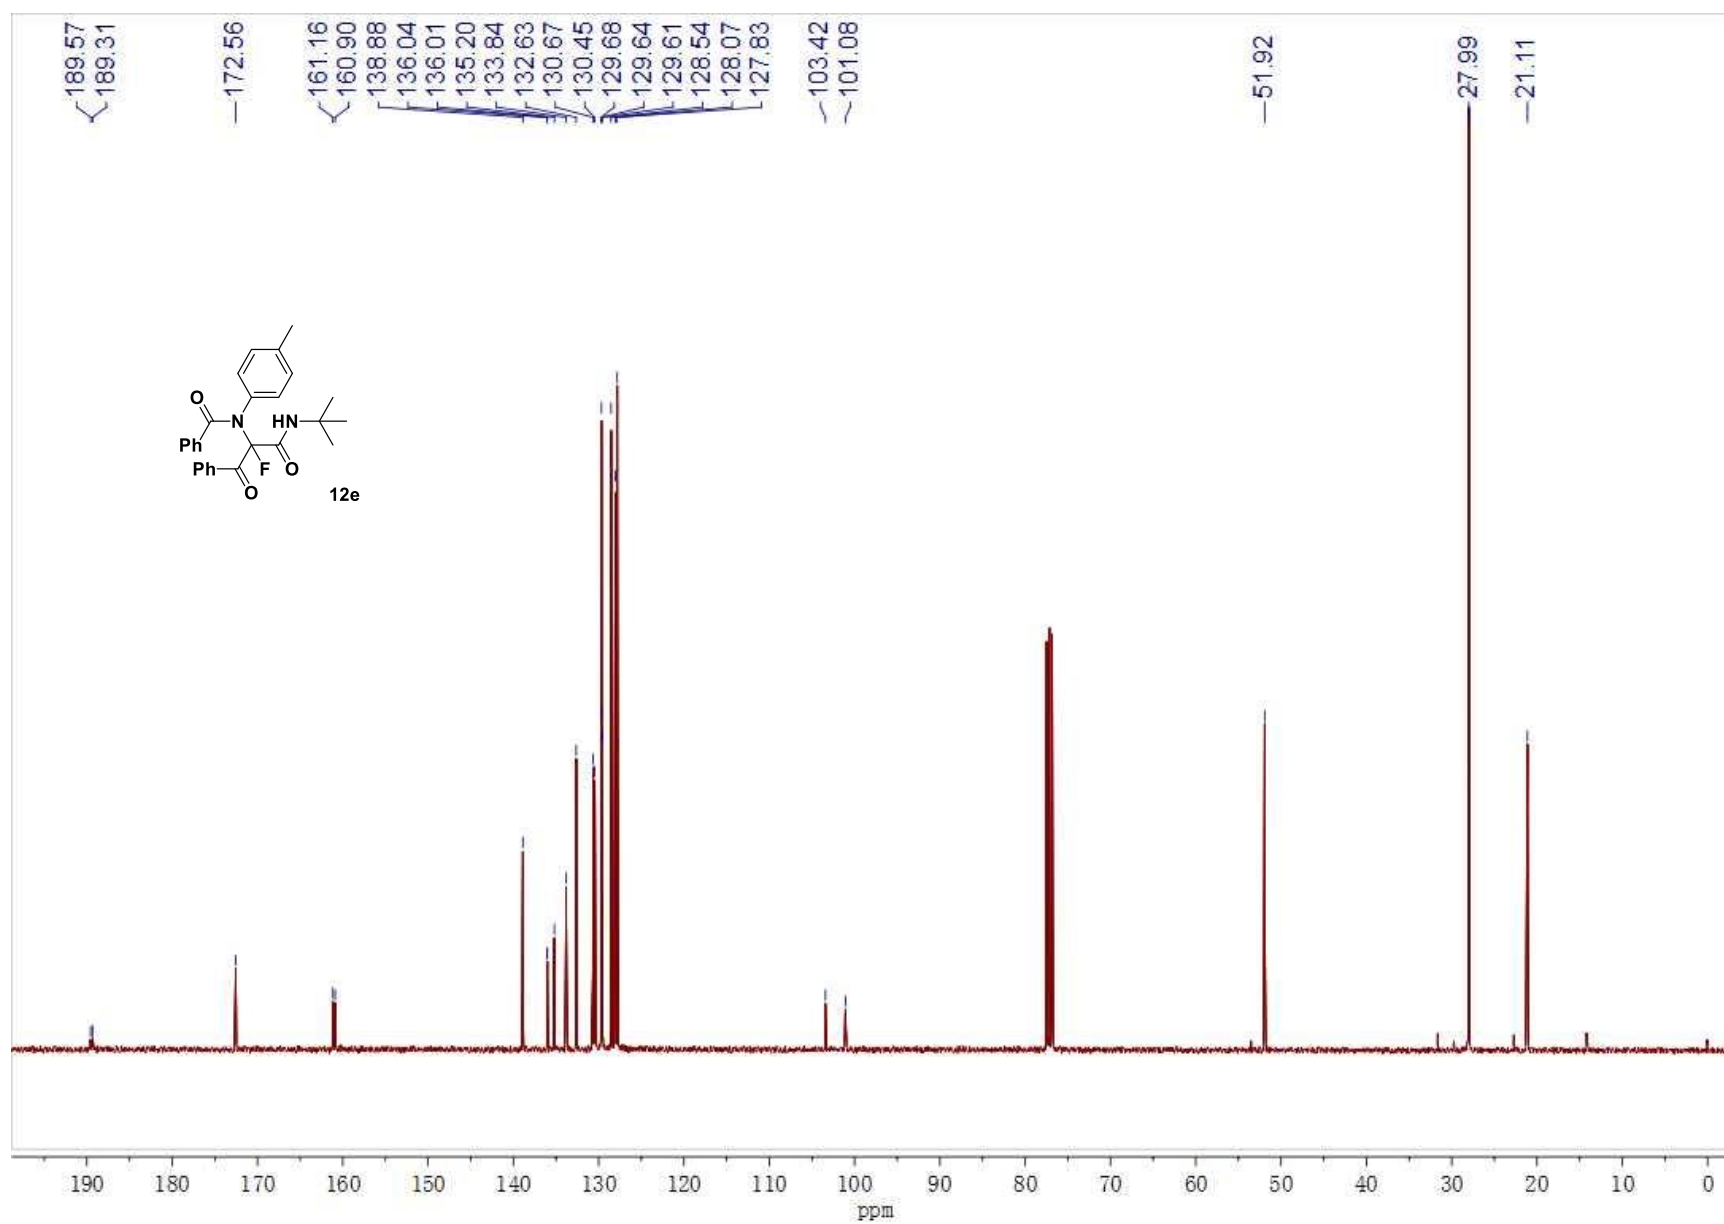

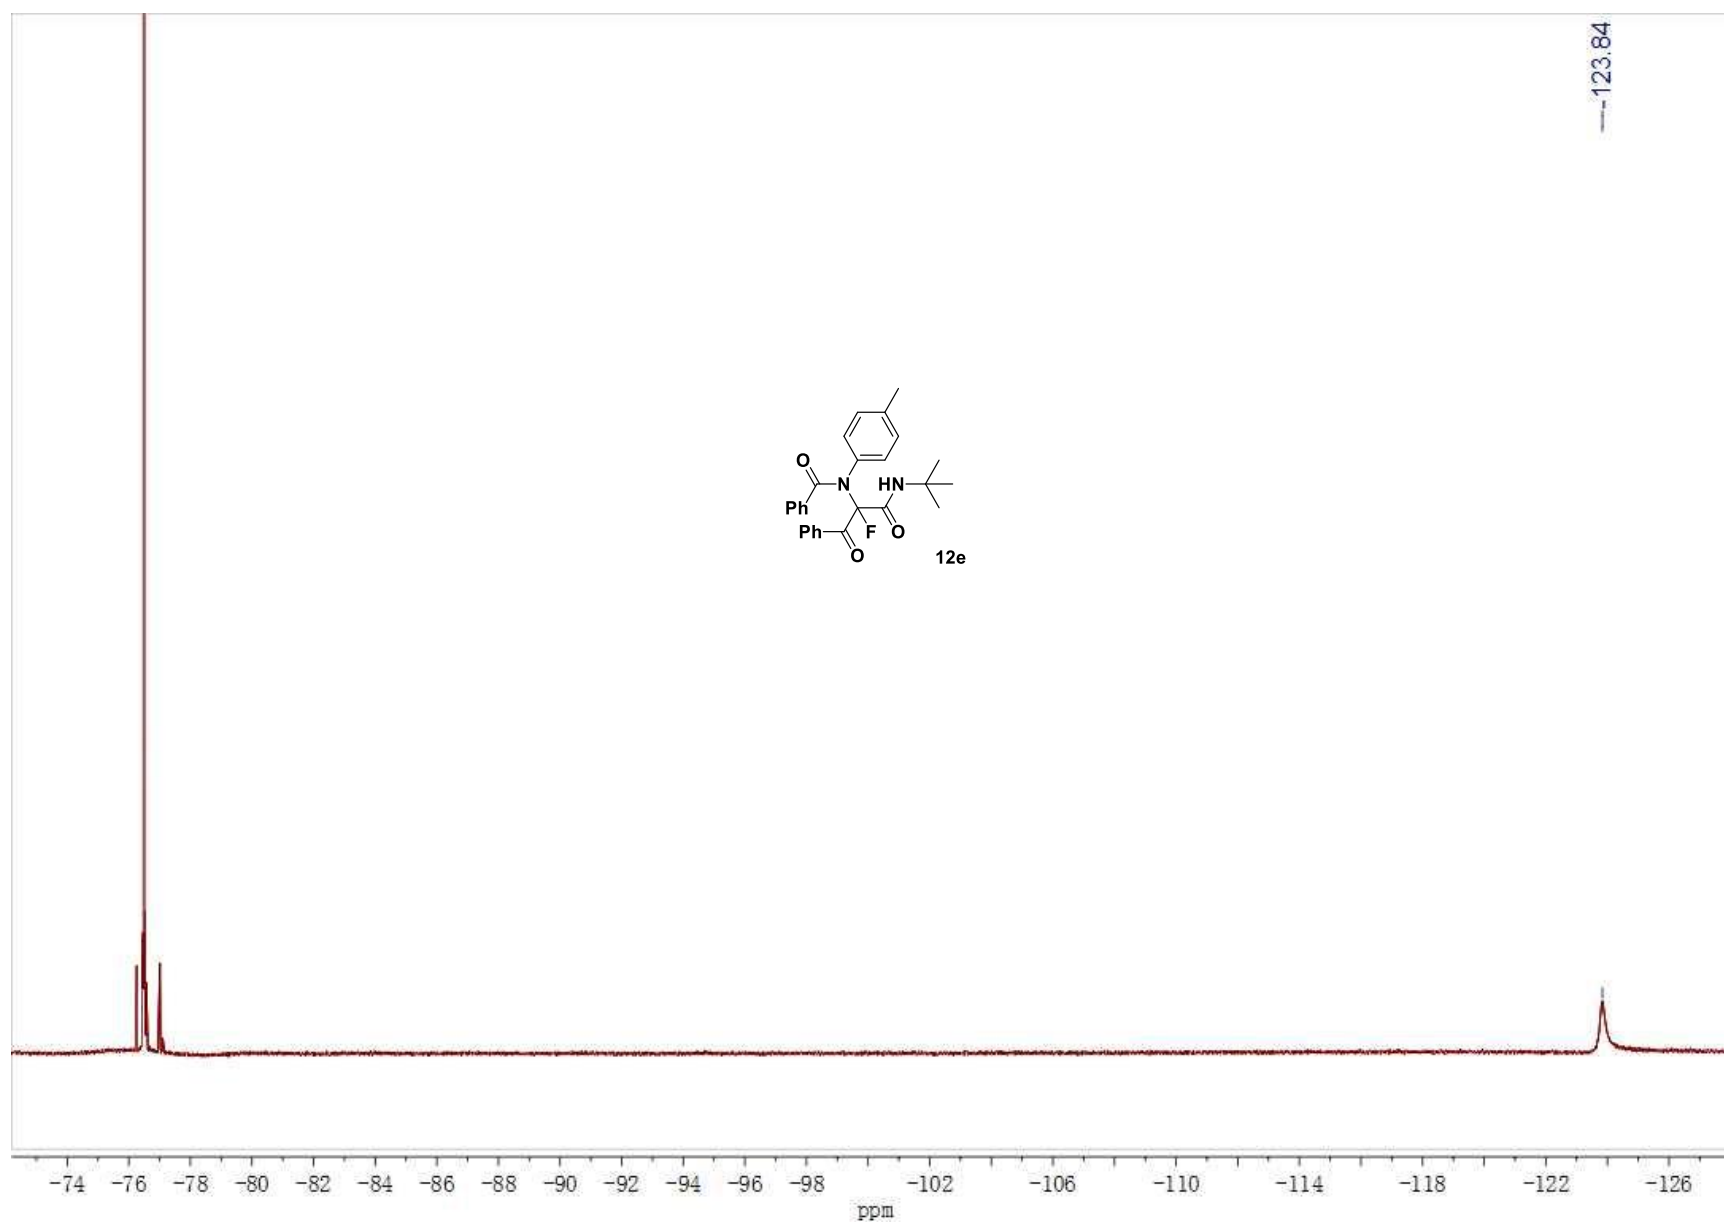

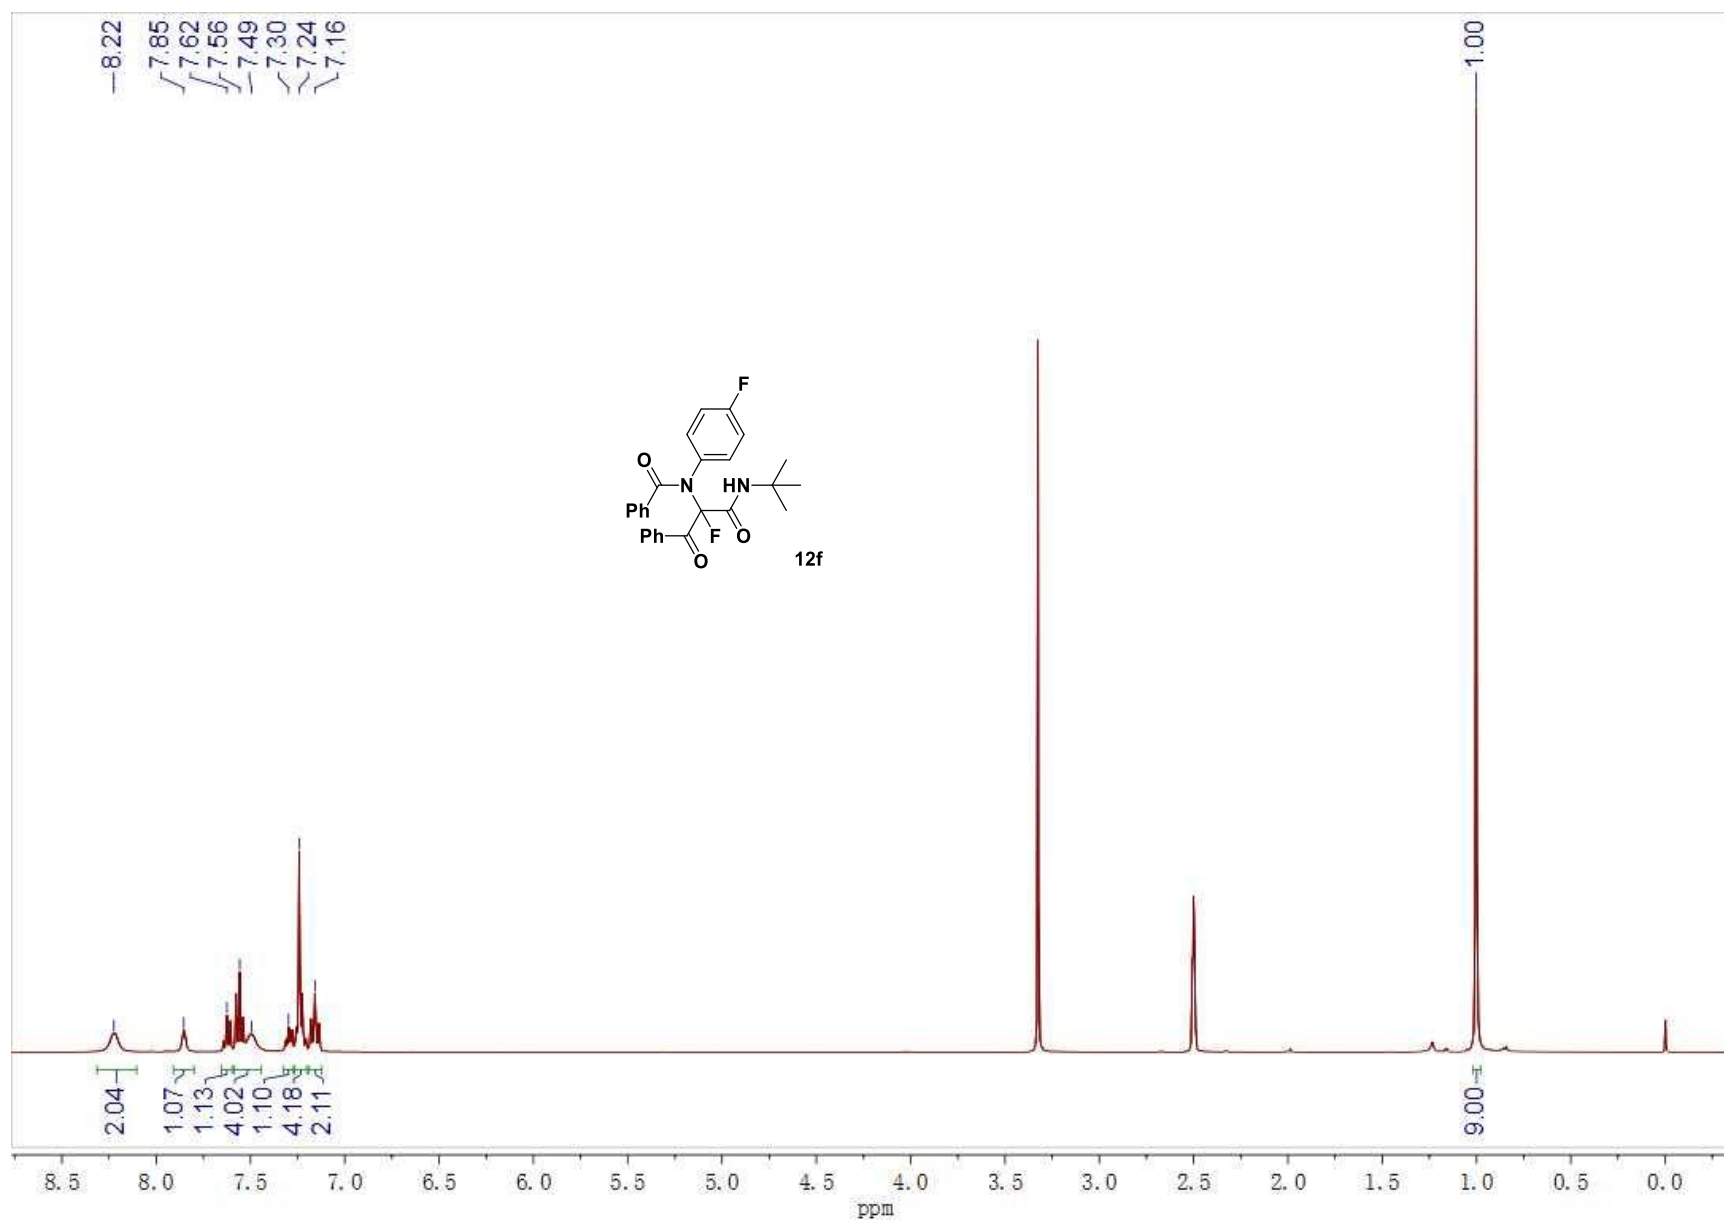

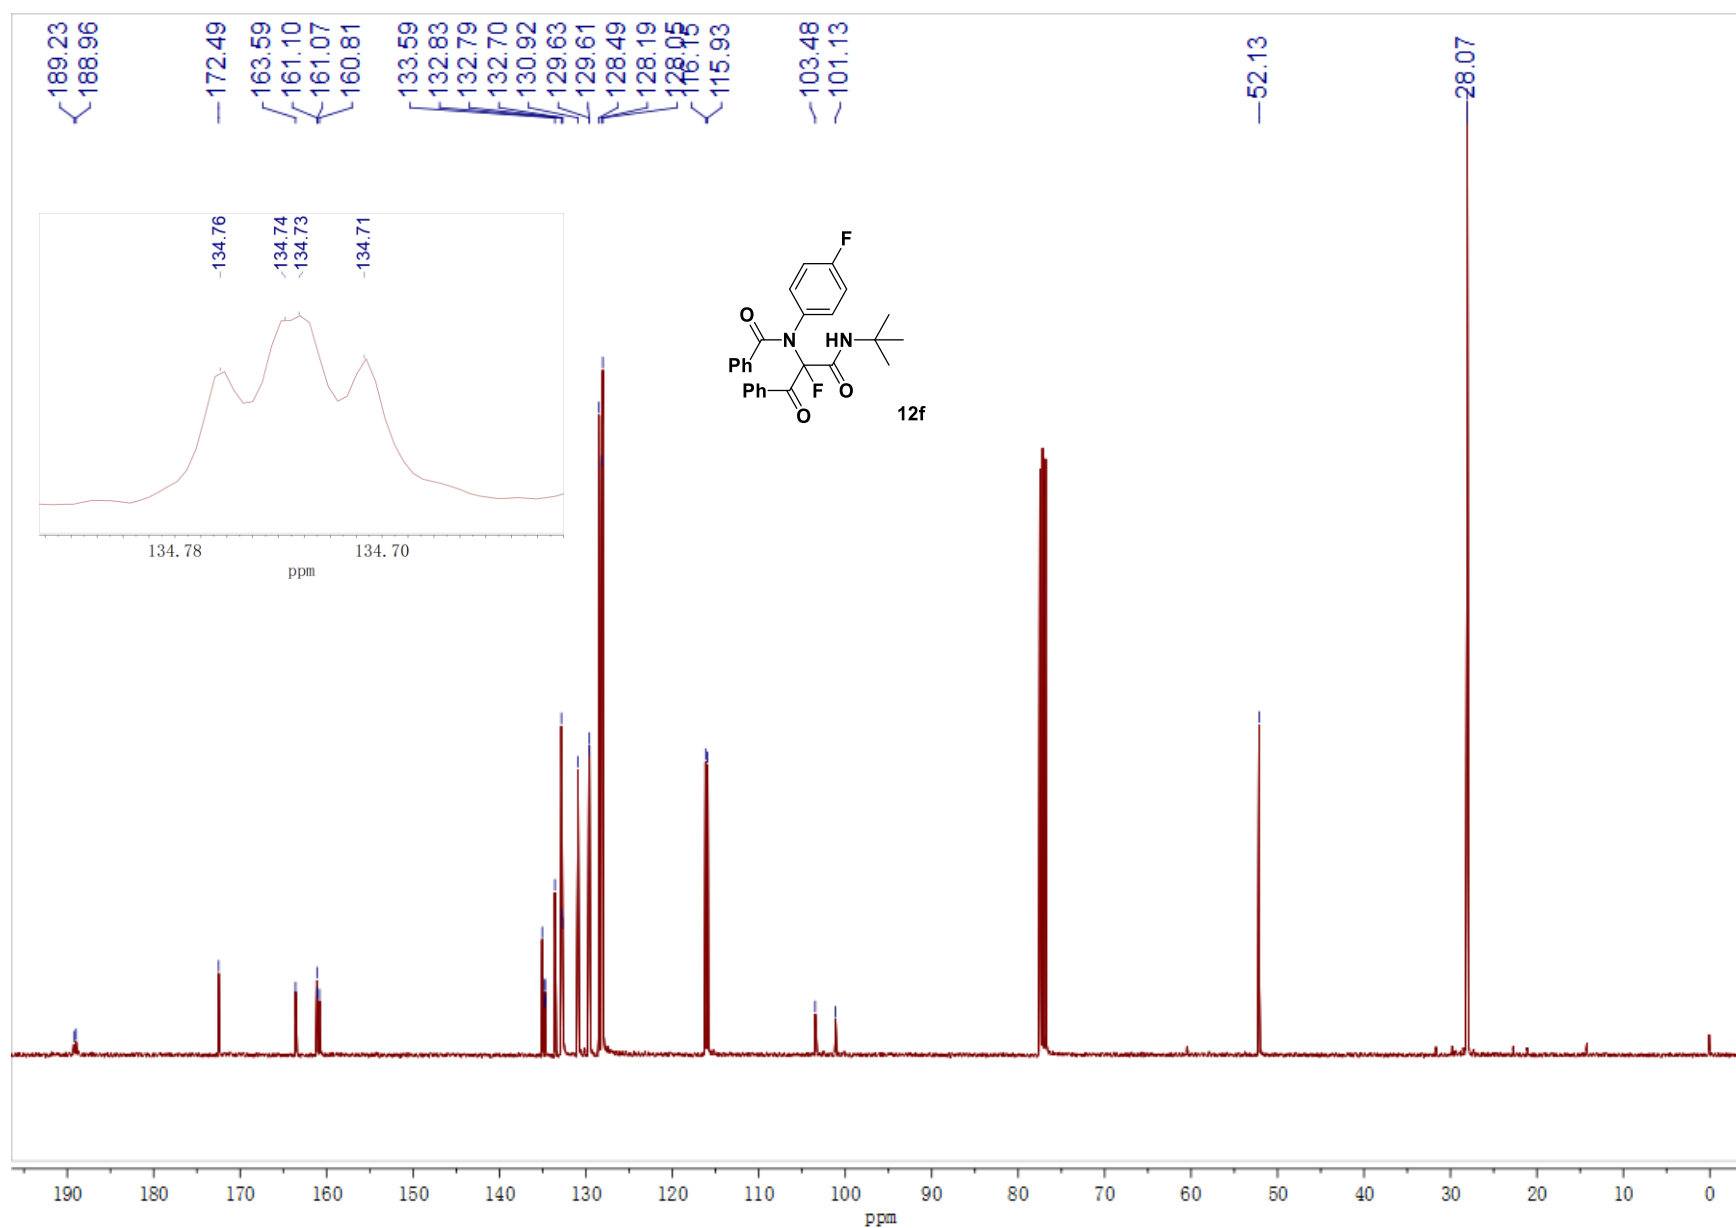

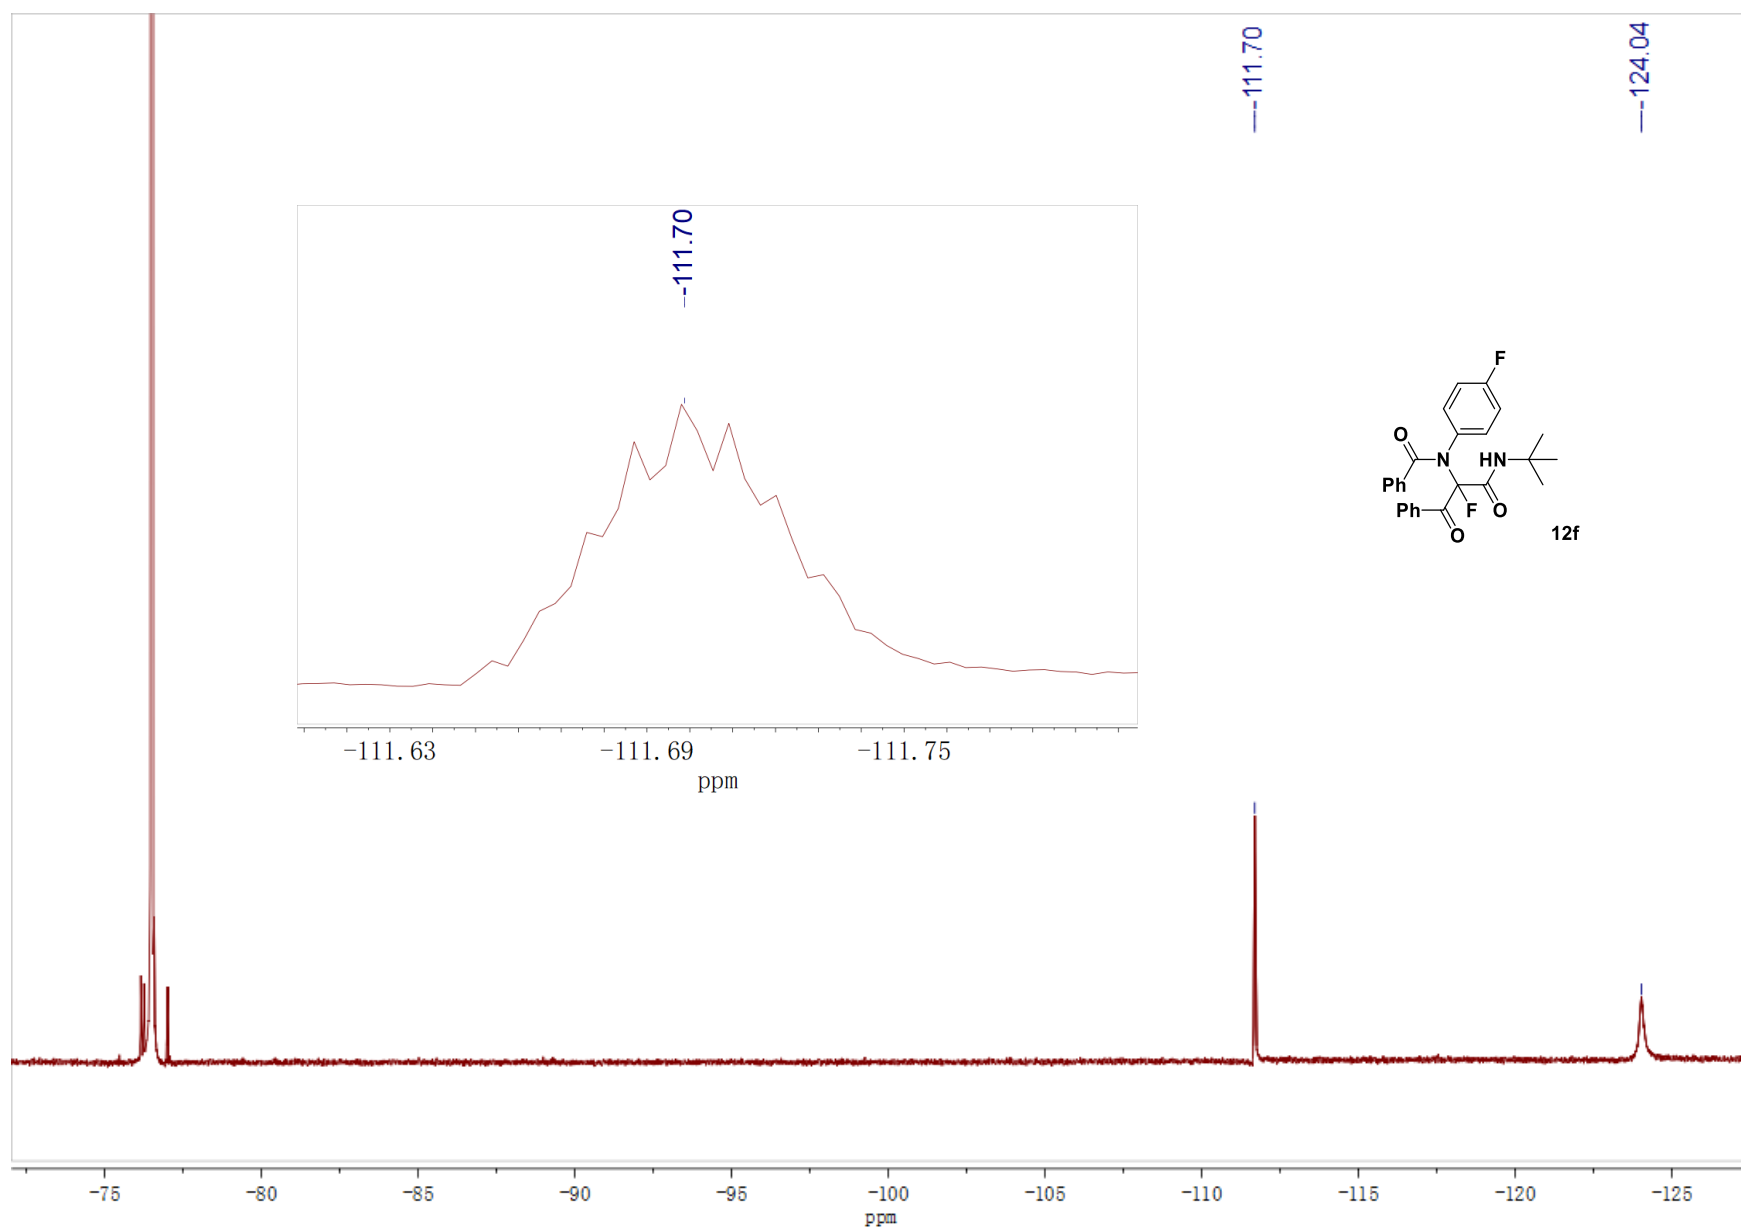

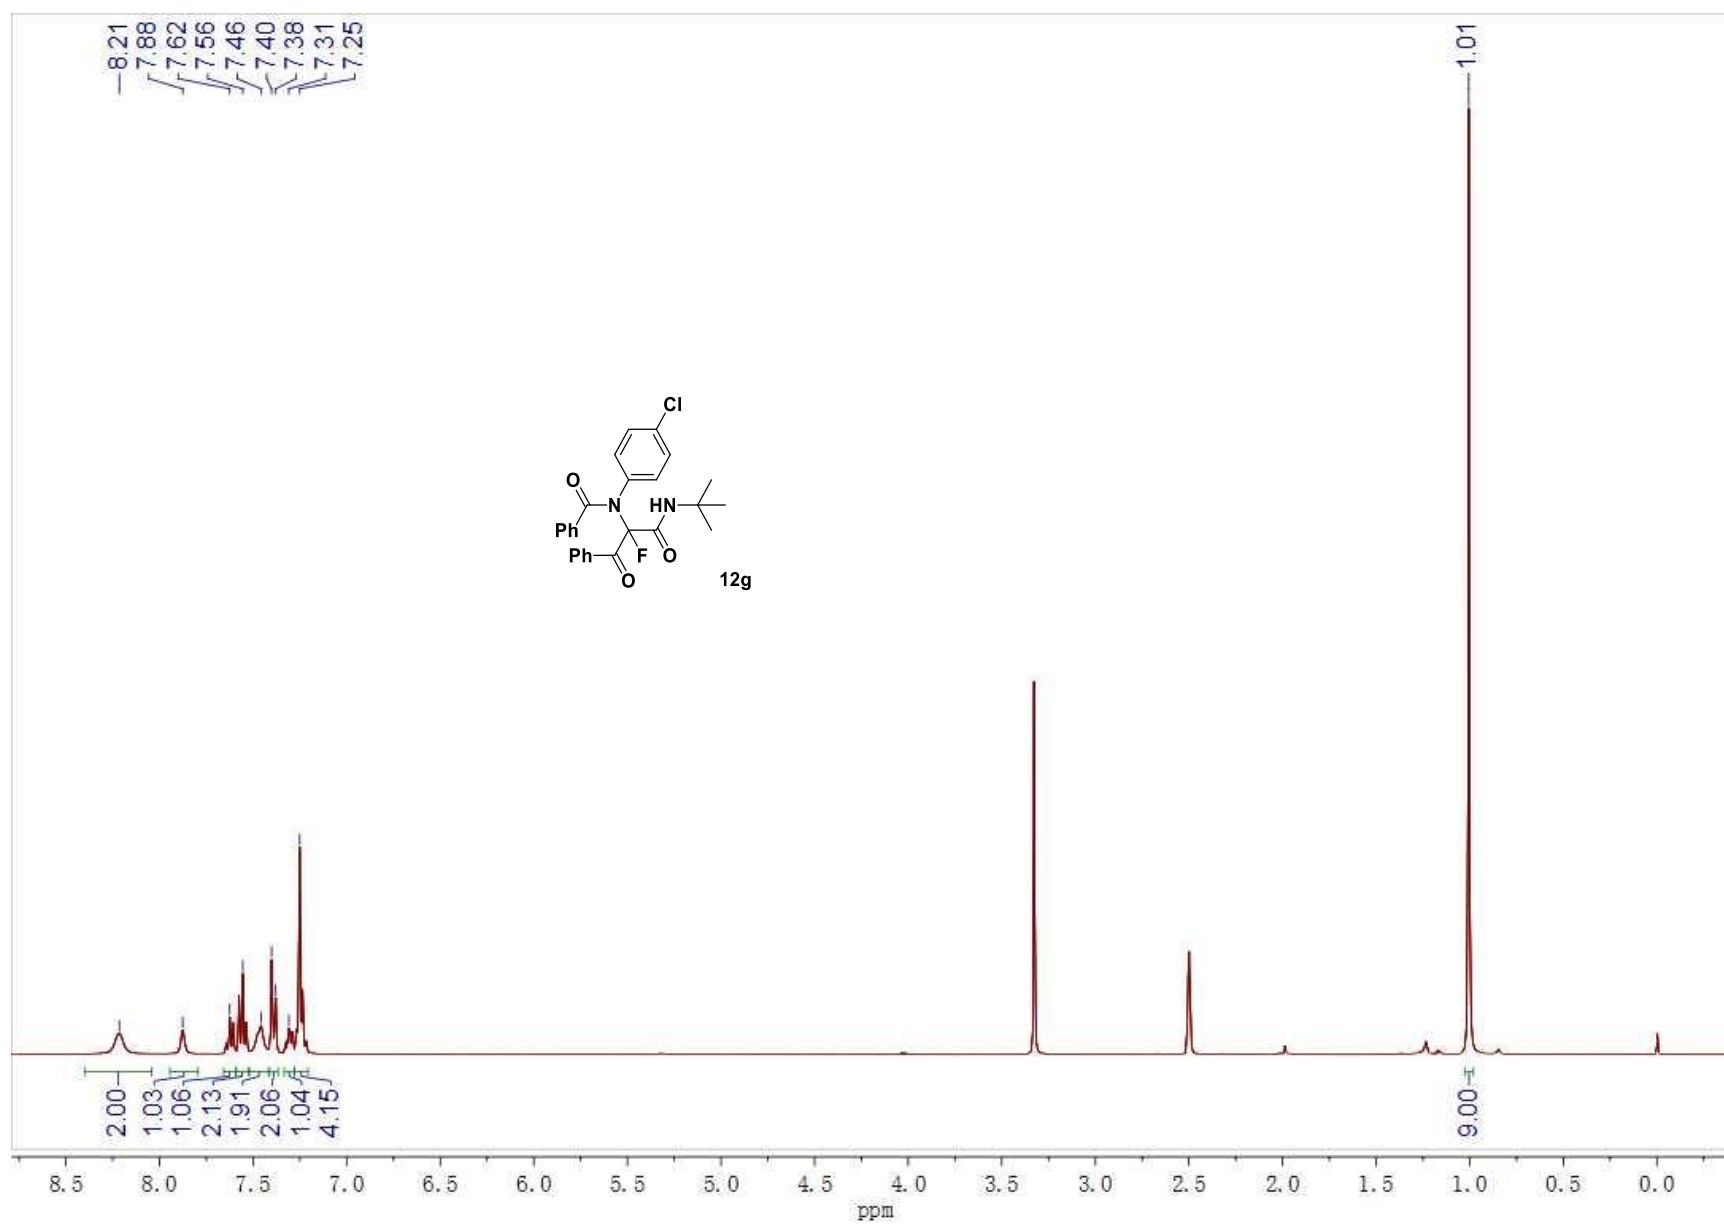

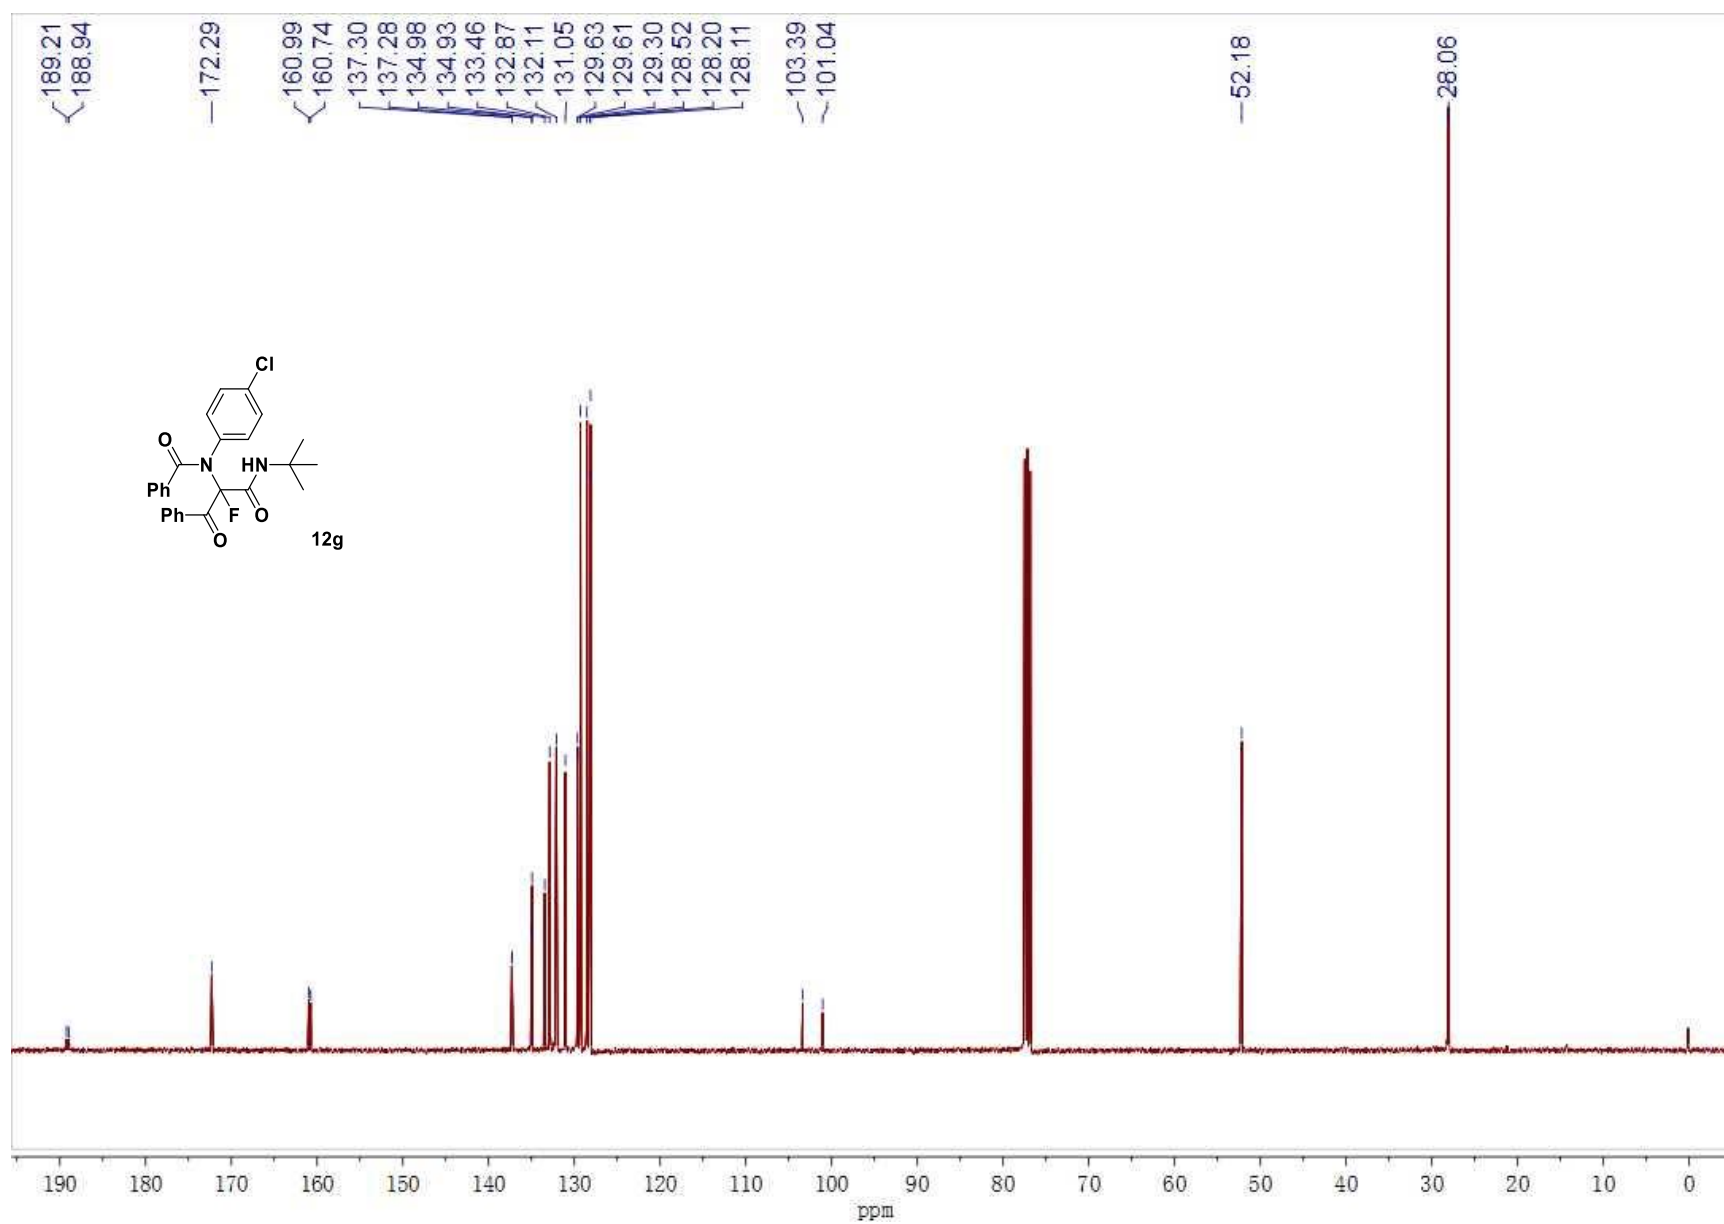

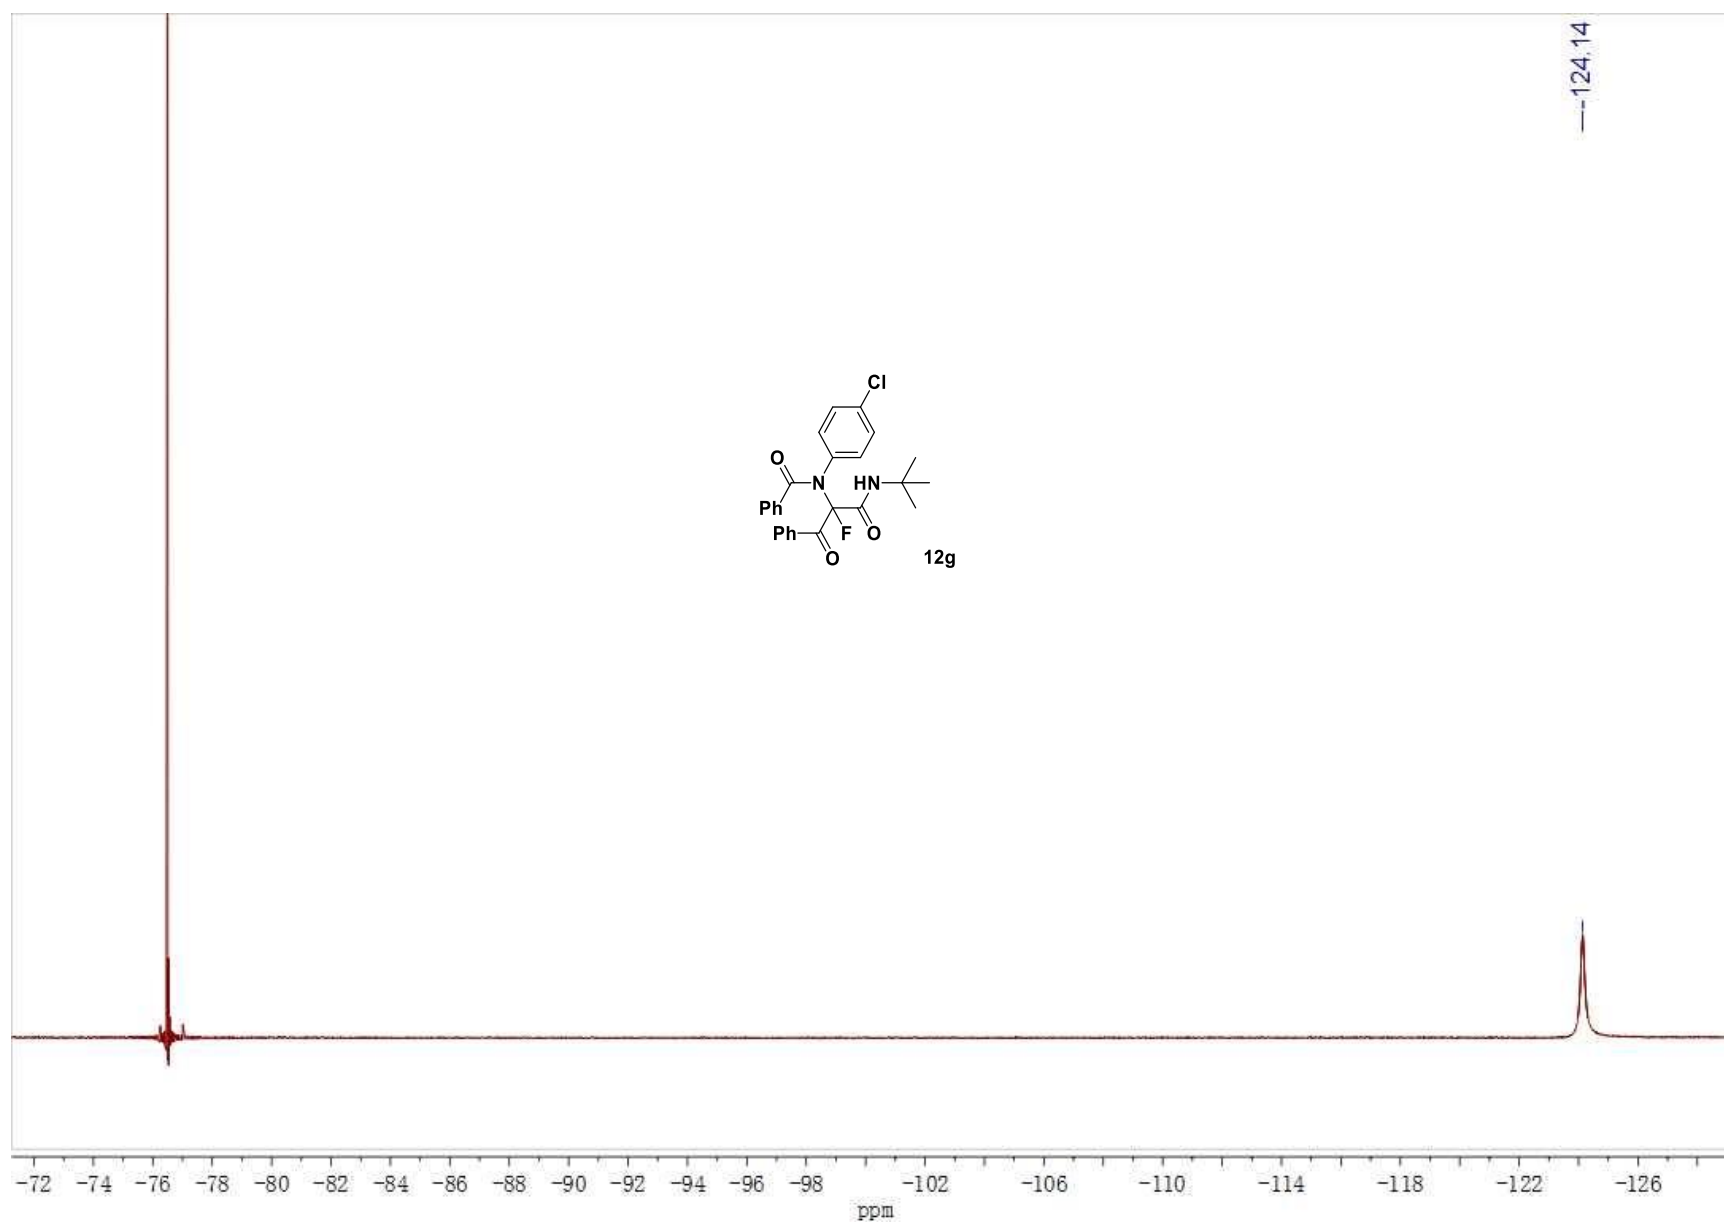

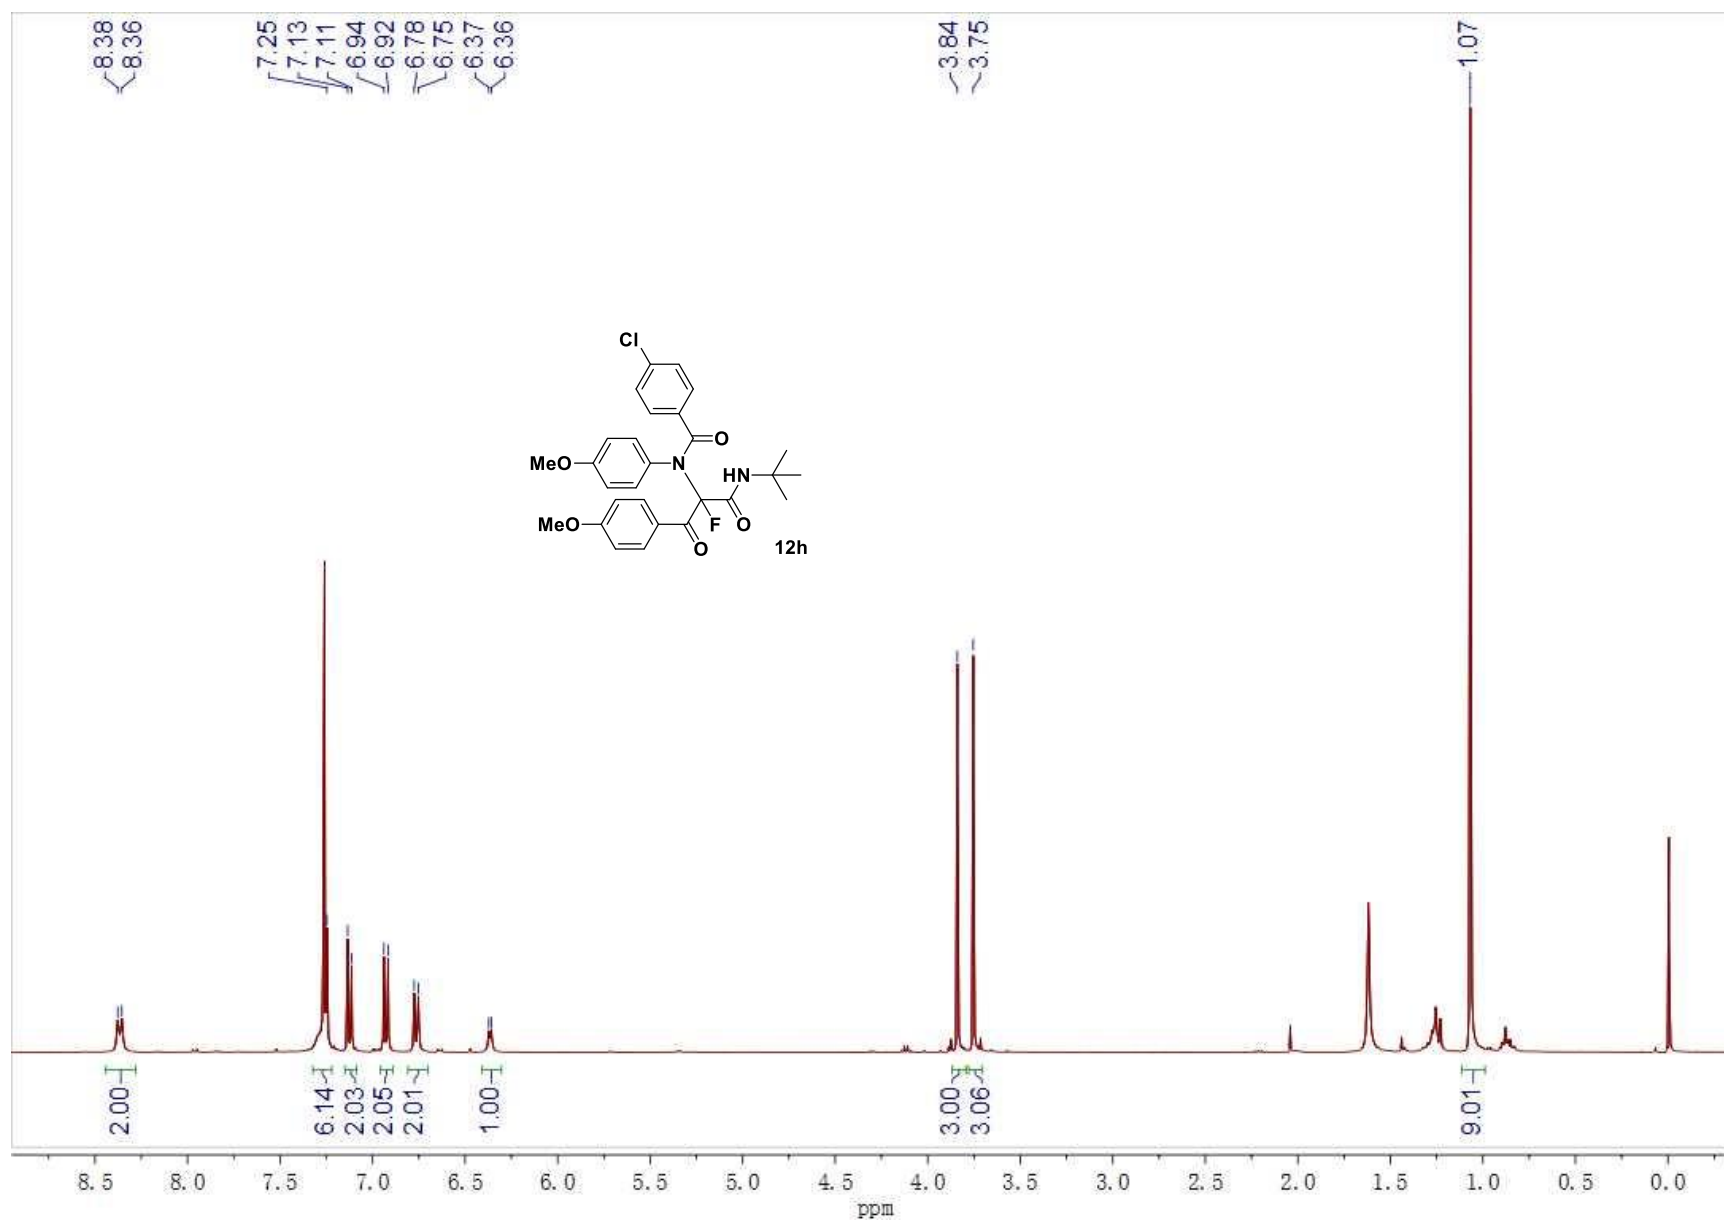

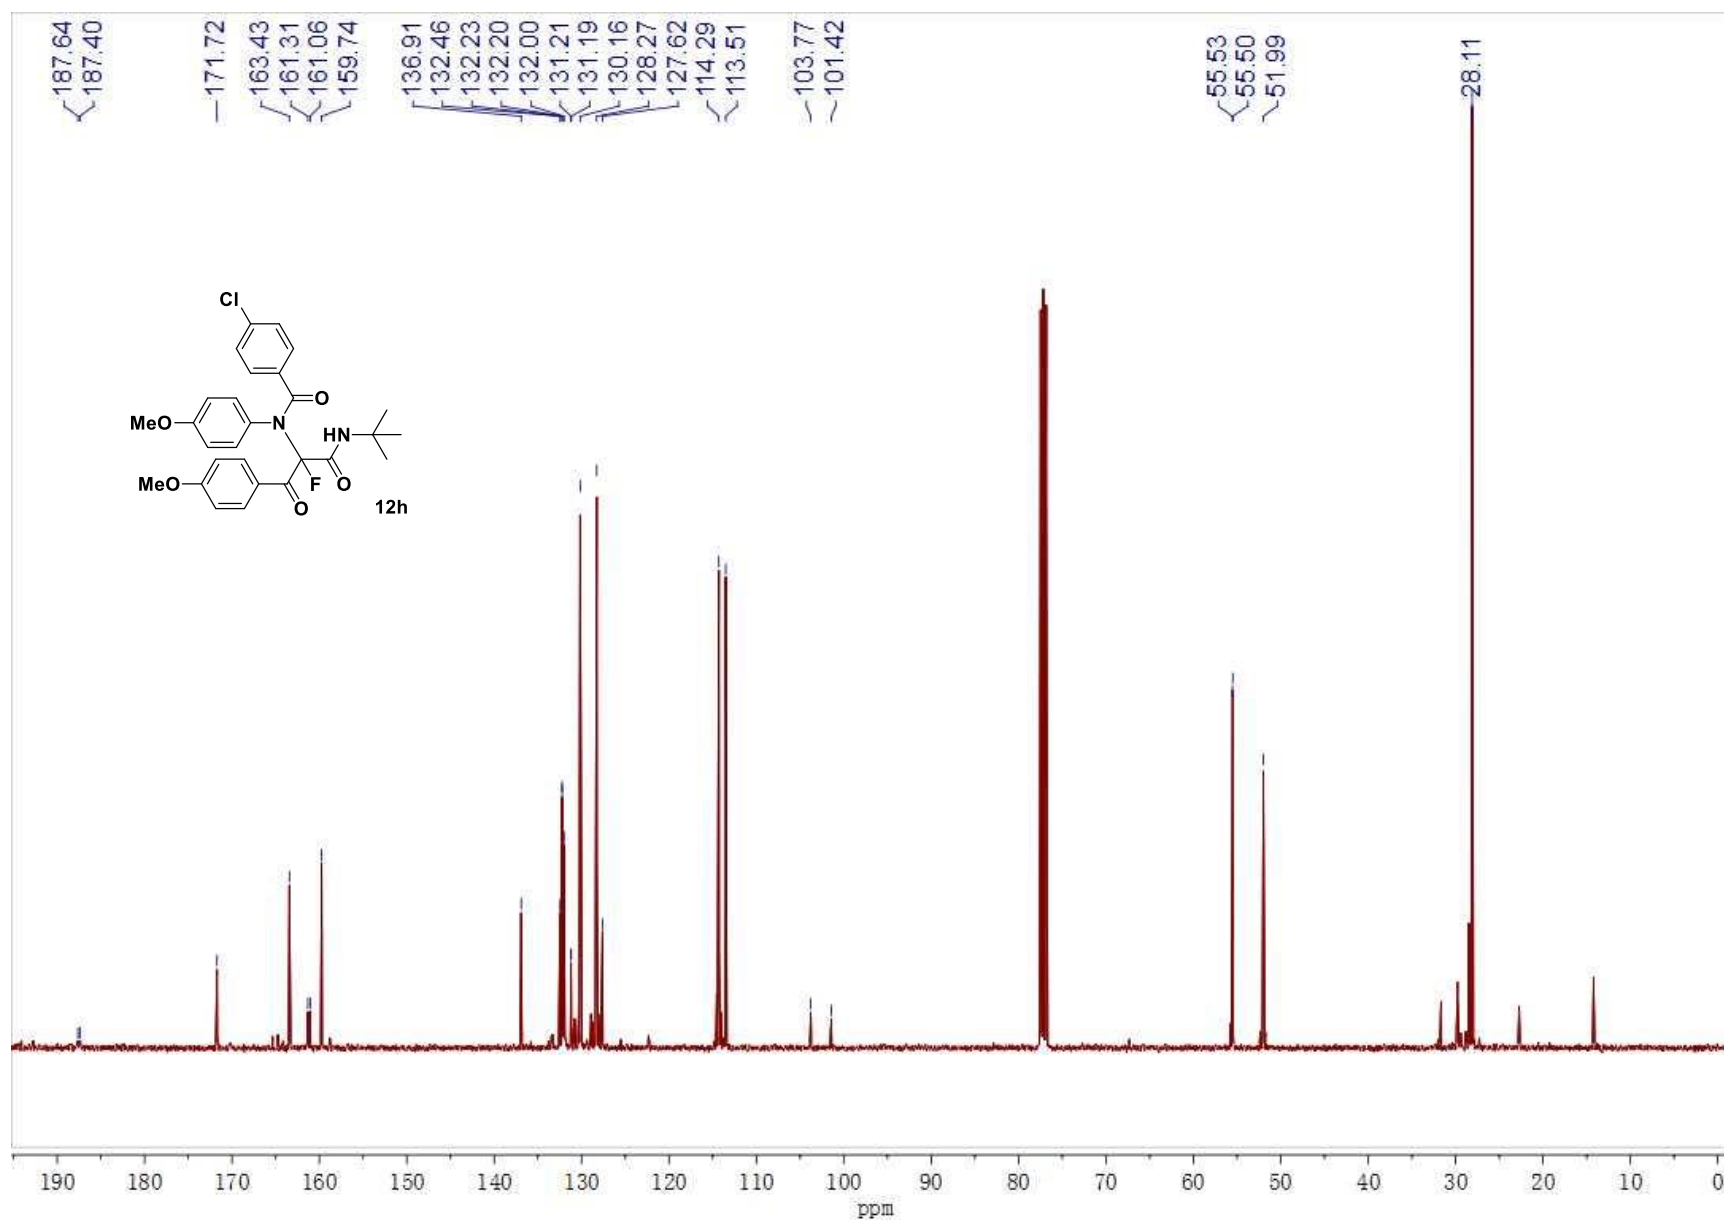

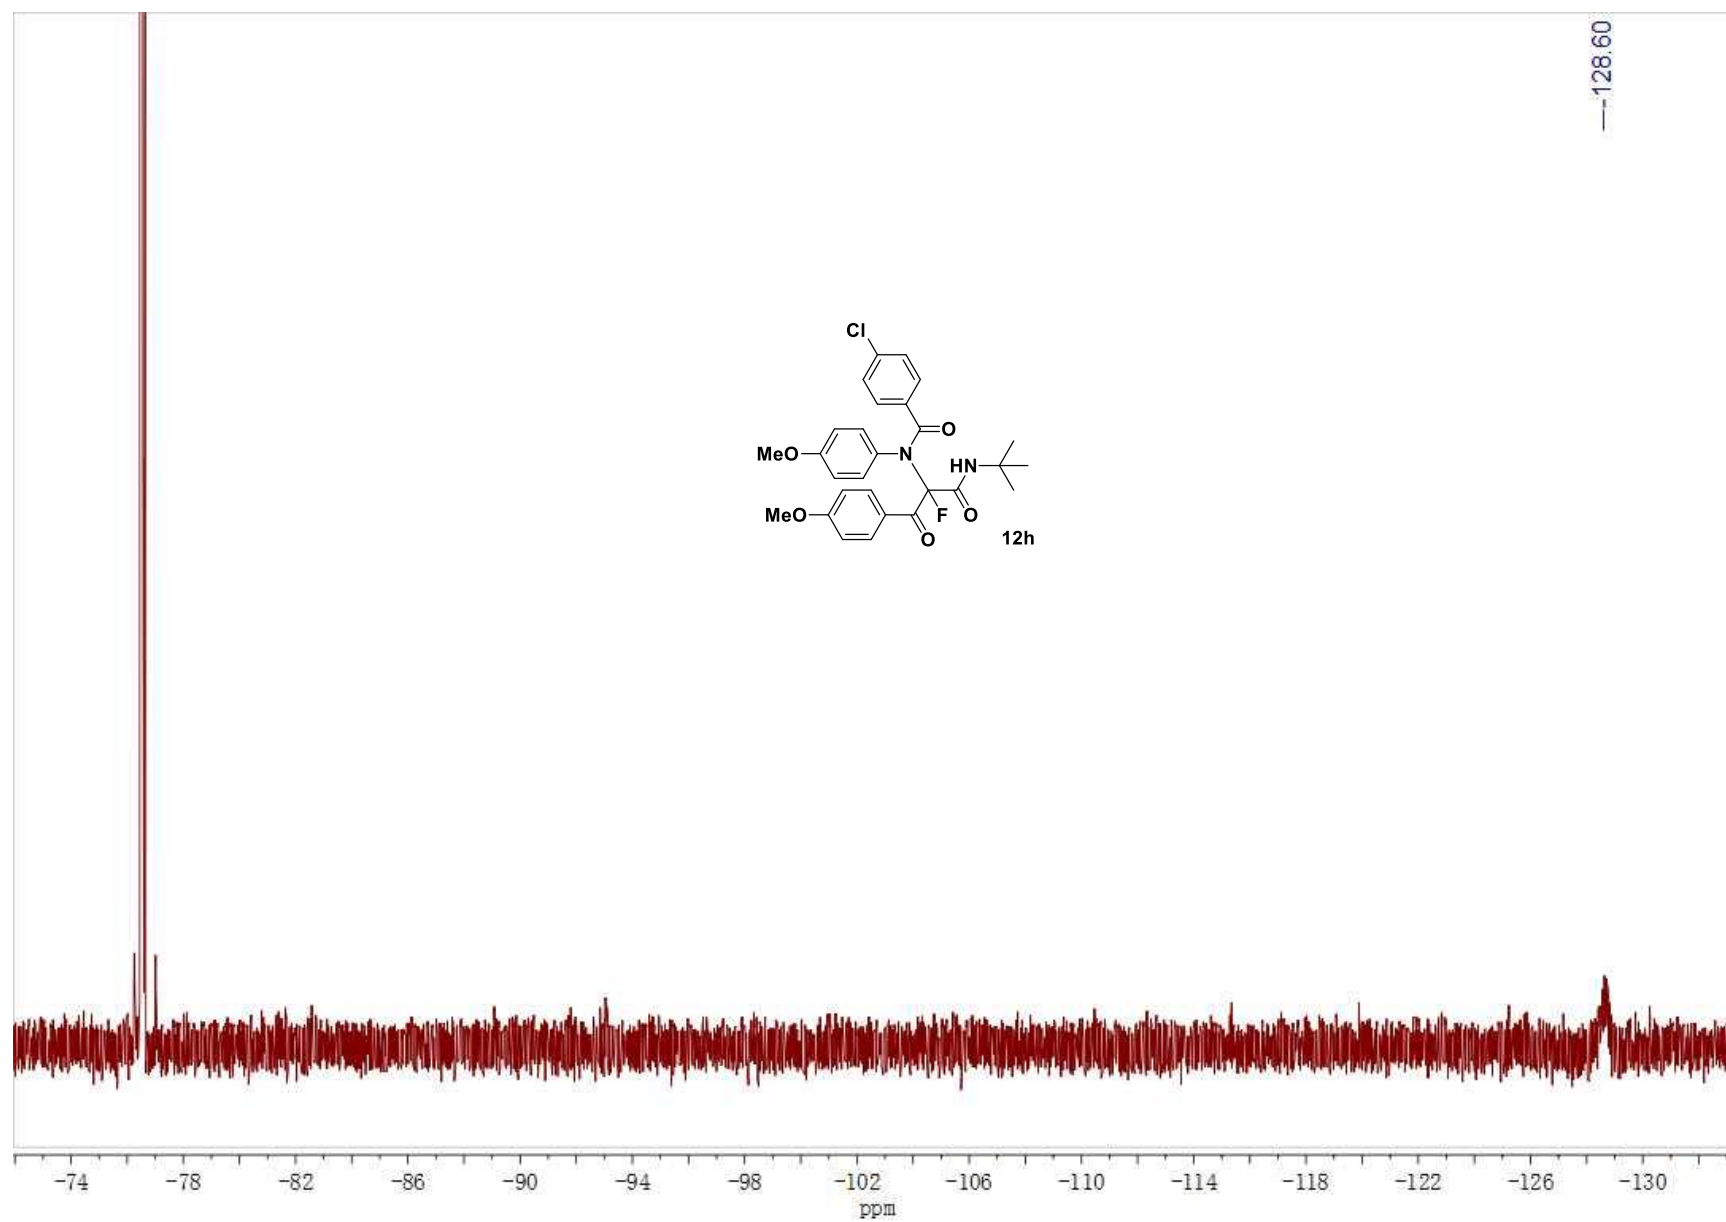

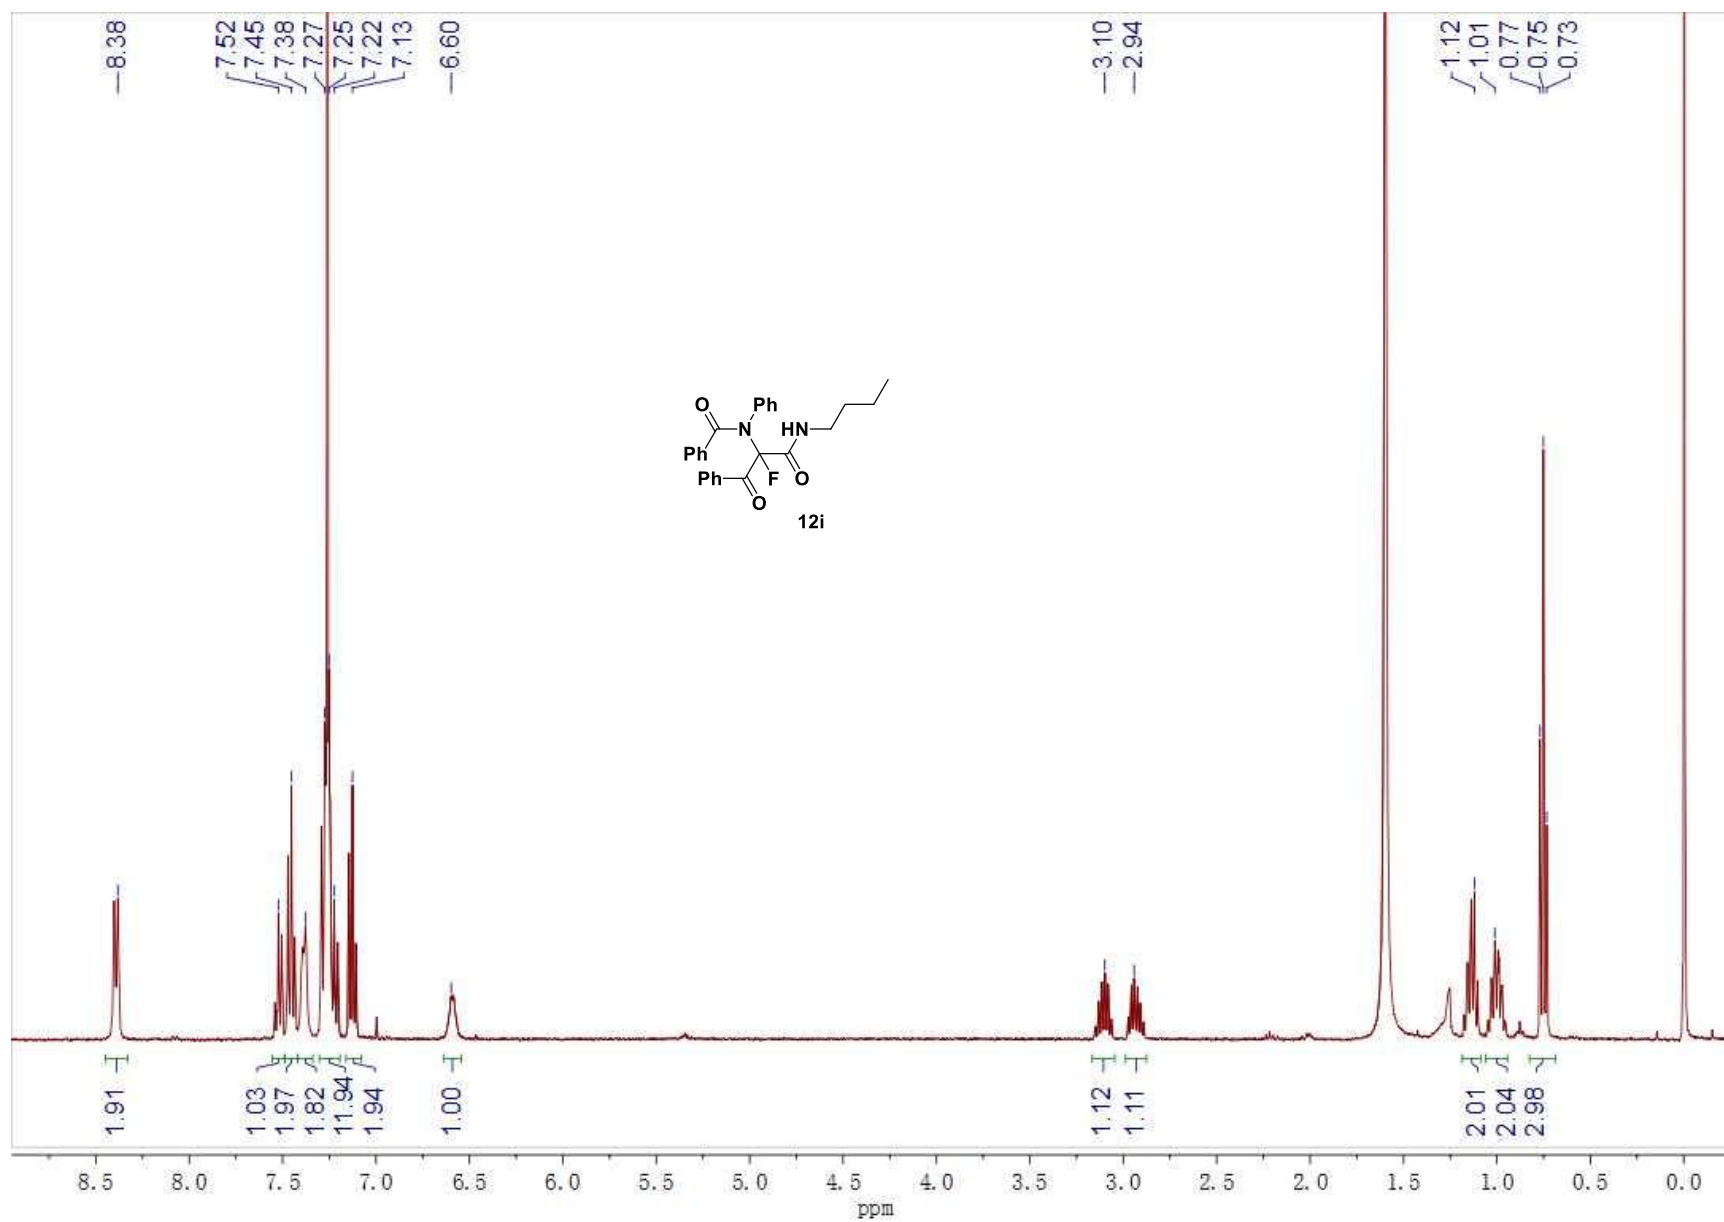

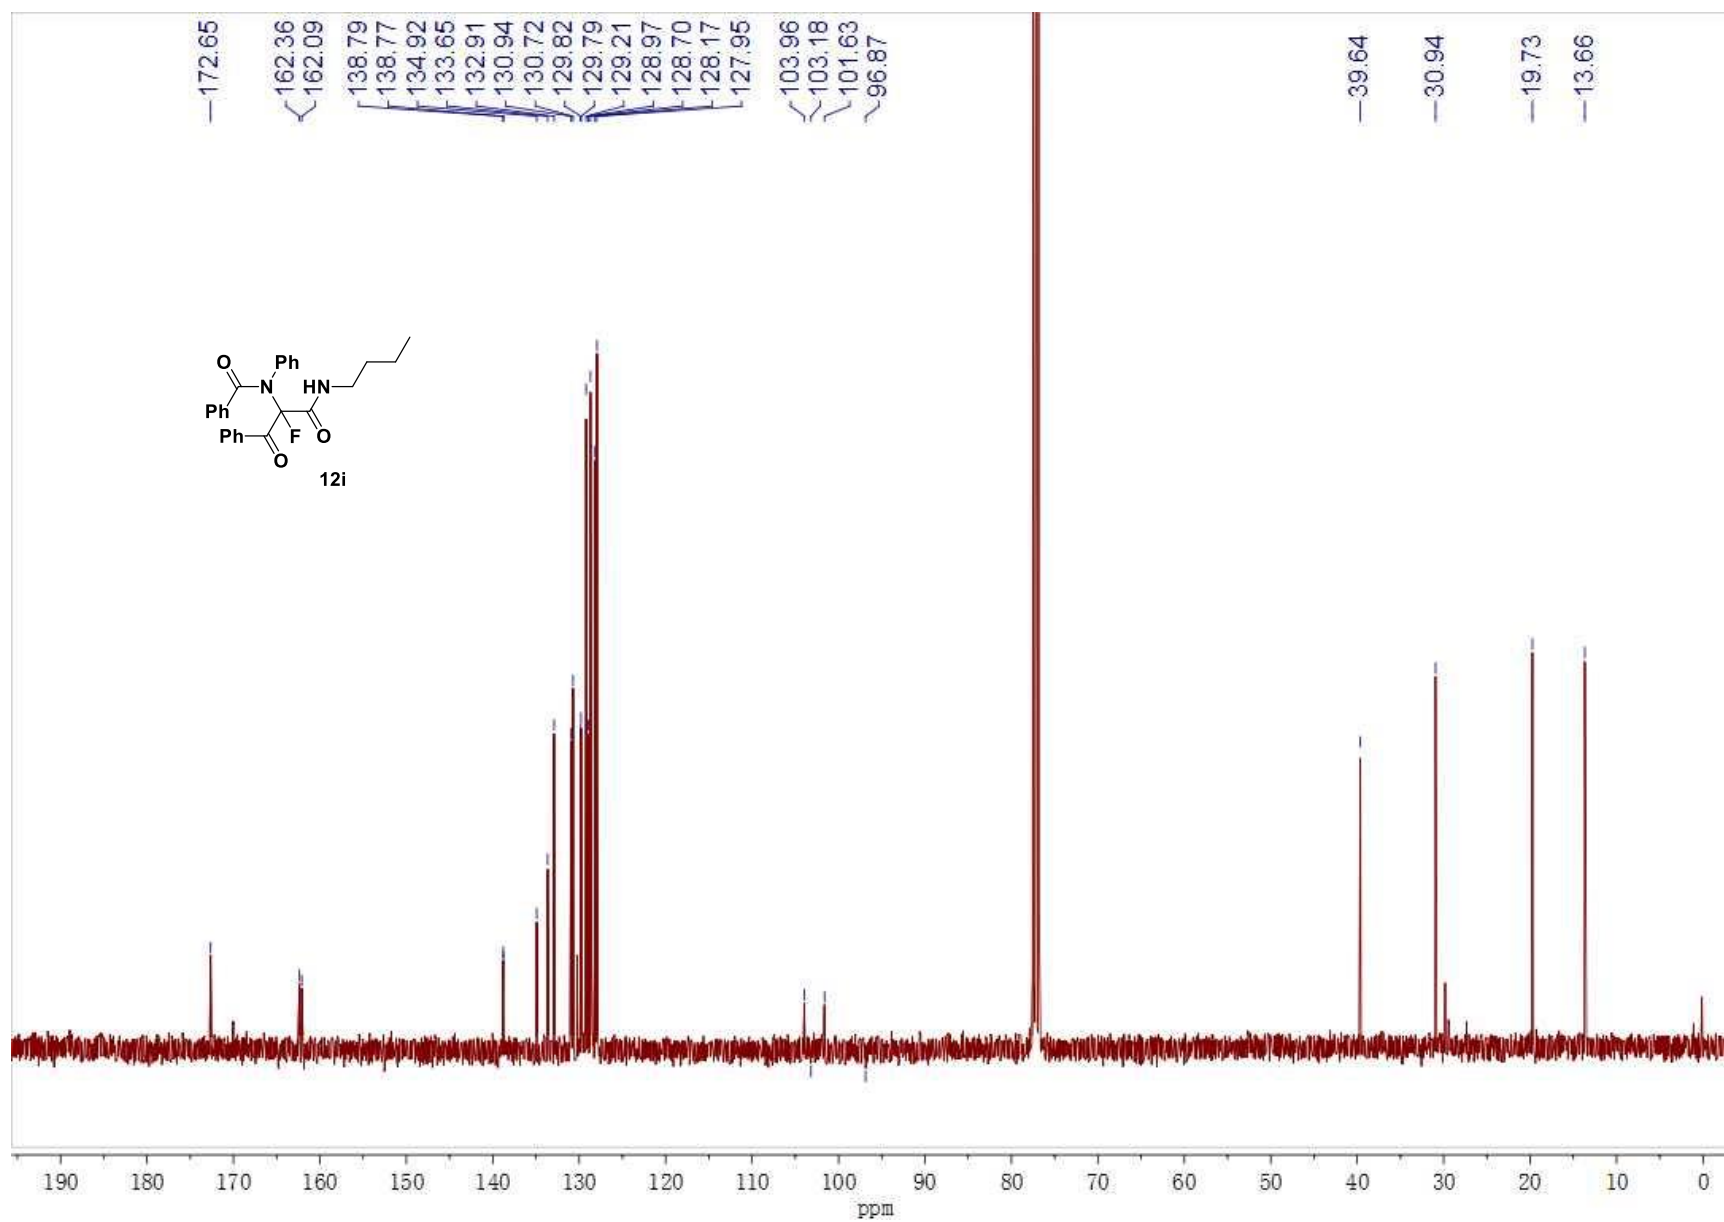

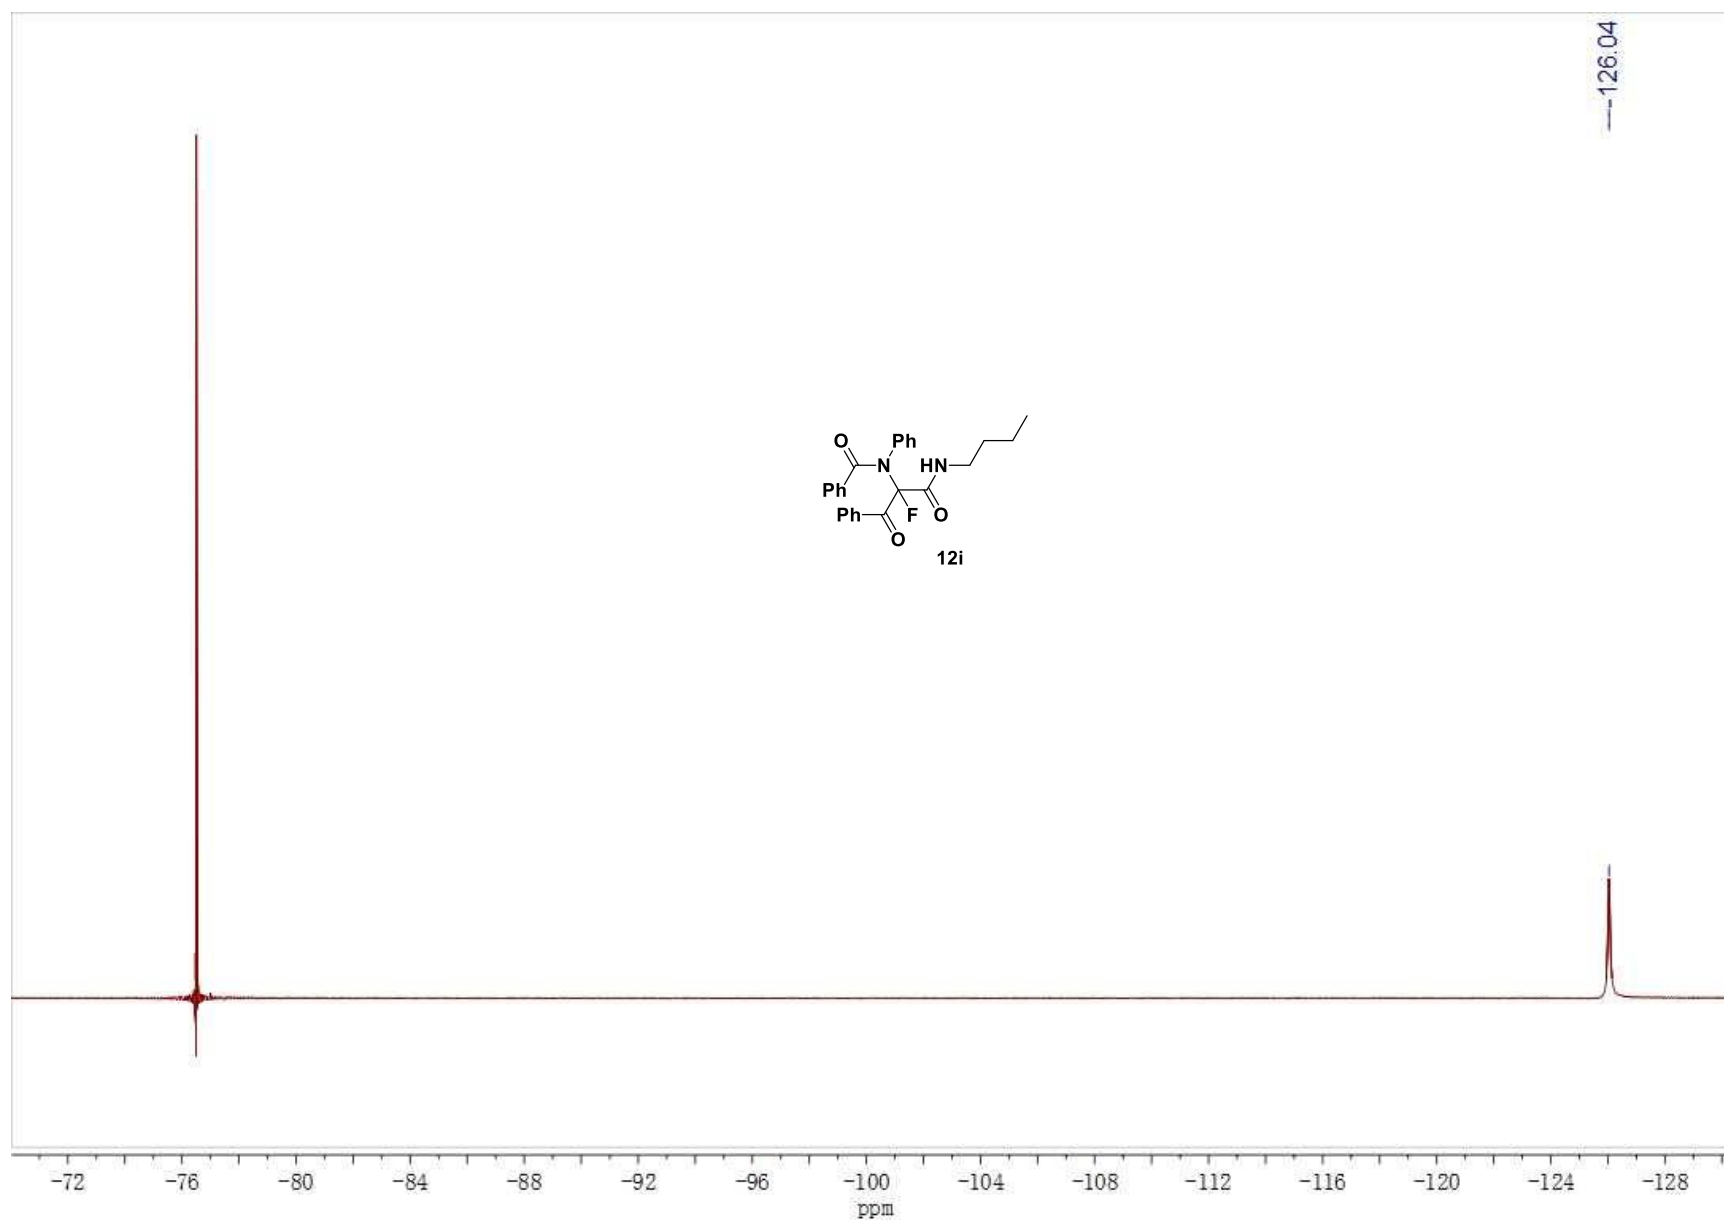

Supplement: Additional file 1 [file 1860-5397-16-163-S1.pdf]
